# Supplementary material for: iPSC-derived reactive astrocytes from patients with multiple sclerosis protect cocultured neurons in inflammatory conditions
Source: PubMed Central journal article supplement (PMC10313373; doi:10.1172/jci164637), 2023-07-03
Supplement: jci-133-164637-s072.pdf [file jci-133-164637-s072.pdf]

S1A

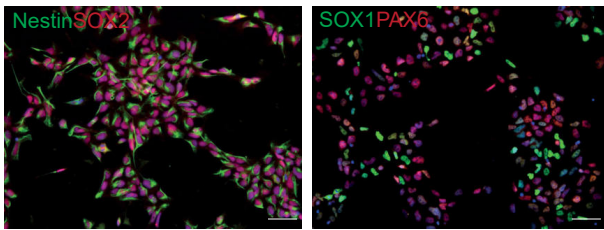

S1B

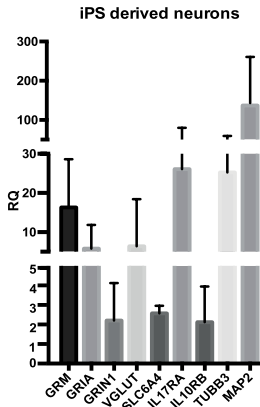

S1C

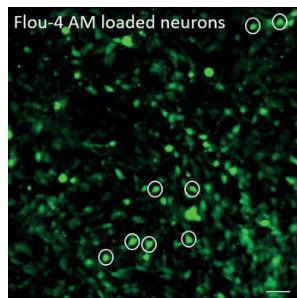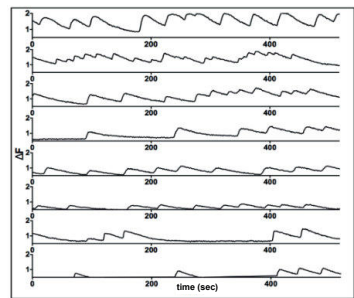

S1D

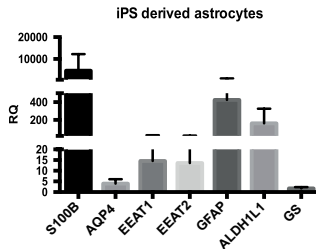

S1E

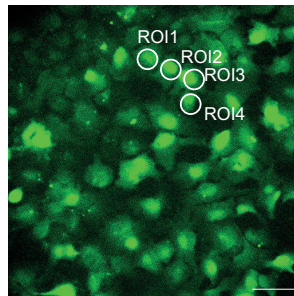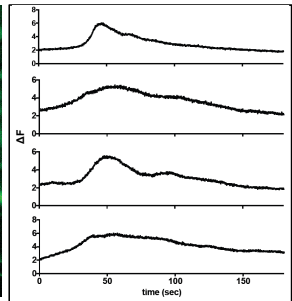

### Figure S1 (A) Characterization confirms successful iPSC differentiation into NSC.

Immunofluorescence staining of neural stem cell marker Nestin, Sox2, Sox1 and Pax6 of NSCs in p4.

Scale bar: 50  $\mu$ m. **(B) Rt-qPCR of differentiated iPSC-derived neurons presenting a heterogeneous neuronal phenotype.** Bar graph shows the mean RQ + SD of two different lines (BMS1; PMS2) of three independent experiments each. GAPDH and actin were used as housekeeping genes. **(C)  $Ca^{2+}$  imaging show spontaneously active iPSC-derived neurons.** iPSC-derived neurons were loaded with 1  $\mu$ M Fluo-4 AM for 15 min at 37  $^{\circ}$ C.

Imaging was done within an incubation chamber at 37  $^{\circ}$ C, 5%  $CO_2$  and observed with an Olympus Cell $\nu$ R microscope. Stacks of images were recorded at rate of 5 Hz for 3 minute and activities of single neurons were tracked with ImageJ. **(D) Rt-qPCR of differentiated iPSC-derived astrocytes confirm a mature phenotype.** Bar graph shows the mean RQ + SD of all six lines. GAPDH and actin were used as housekeeping genes. **(E)  $Ca^{2+}$  imaging show spontaneously active iPSC-derived astrocytes.** iPSC-derived astrocytes were loaded with 1  $\mu$ M Fluo-4 AM for 15 min at 37  $^{\circ}$ C.

Imaging was done within an incubation chamber at 37  $^{\circ}$ C, 5%  $CO_2$  and observed with an Olympus Cell $\nu$ R microscope. Stacks of images were recorded at rate of 5 Hz for 3 minute and activities of single astrocytes were tracked with ImageJ.

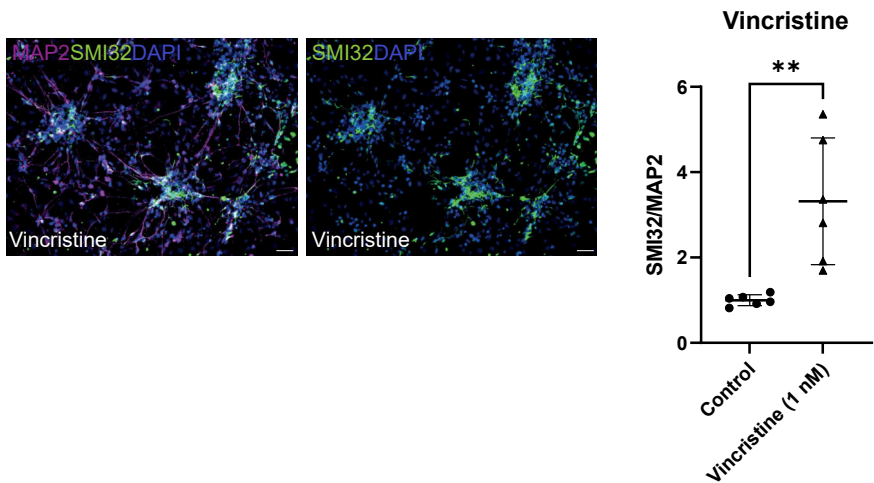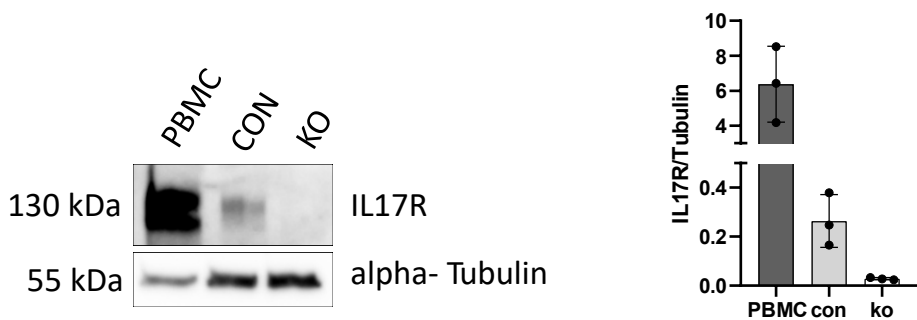

**Figure S2 (A) Evaluation of SMI32 as neuroaxonal marker.** iPSC-derived neurons were treated with 1 nM vincristine for 24h and stained against SMI32/MAP2. Neurons showed significantly increased in SMI32/ MAP2 ratios and confirmed SMI32 as suitable neuroaxonal marker. **(B) Western Blot confirmed knock-out of IL-17R in PMS1.** PBMCs were used as positive control and iPSC without knock-out as negative control for the IL17R-knockout line. All lines were normalized to  $\alpha$ -tubulin and bar graph shows the mean + SD ratio of IL-17R/ $\alpha$ -tubulin of three independent experiments.

## BIHi047-A autologous co-culture

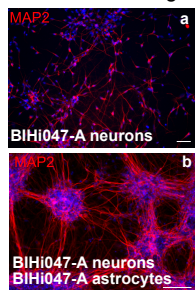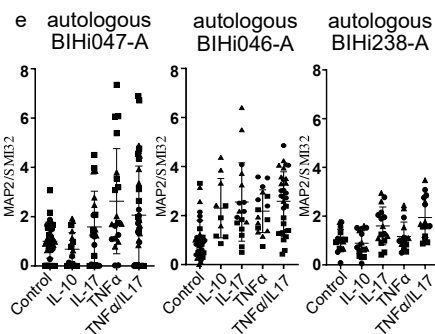

## BIHi237-A NGN2 co-culture

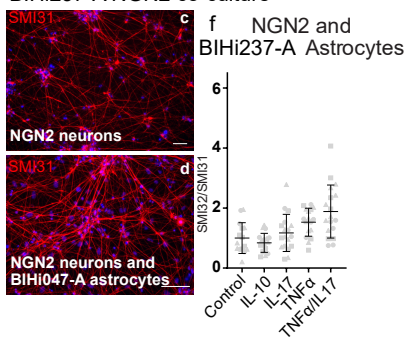

**Figure 3 Comparison of autologous and NGN-2 co-cultures** (a) iPS-derived neurons and (c) NGN2-neurons show similar morphology with a trend to more interconnectivity in the NGN2-neurons. (b) Autologous co-cultures show clustering of neurons, whereas in (d) NGN2-co-cultures there are more branching and interconnecting processes. (e) SMI32 analysis in co-cultures show higher variability than SMI32 analysis in (f) NGN2 co-cultures. Scale bar: 50  $\mu$ m. Disclosure: Fig. f also appears in Fig. 3D (PMS3).

## Cluster of inflammation PMS

## Cluster of inflammation BMS

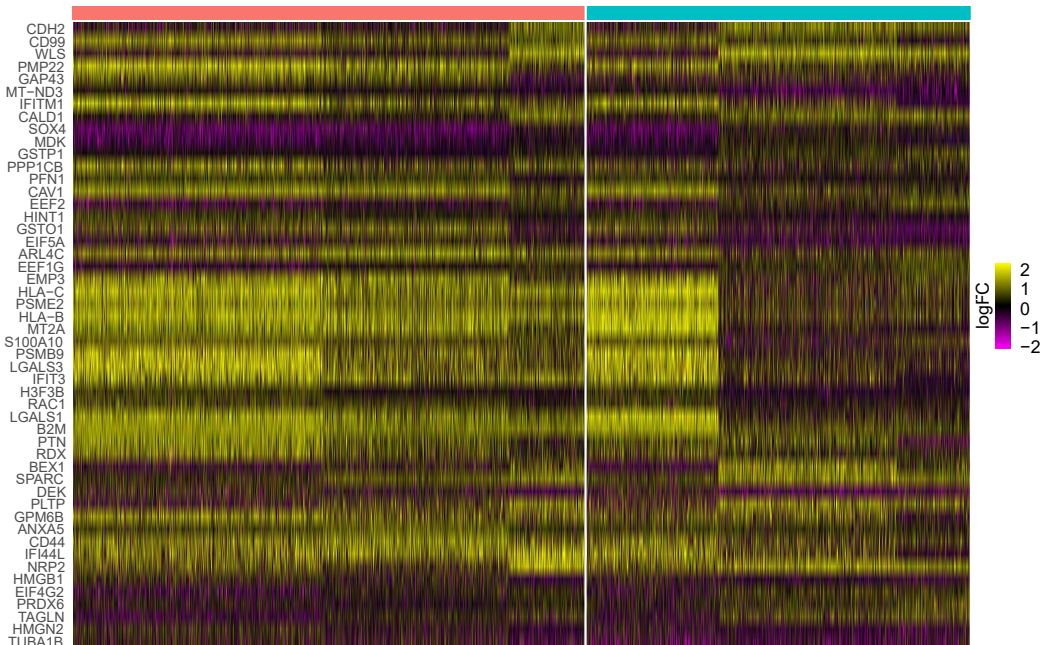

**Figure S4 Heatmap of the top 50 DEG (ranked by adjusted p-value) in the cluster of inflammation.** Single-cell RNAseq data, comparing treated PMS and BMS samples, each line represents a single cell.

S5A

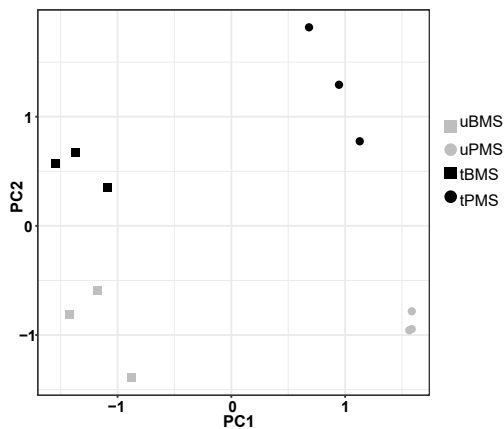

S5B

### BioPlanet 2019 of uBMS vs uPMS

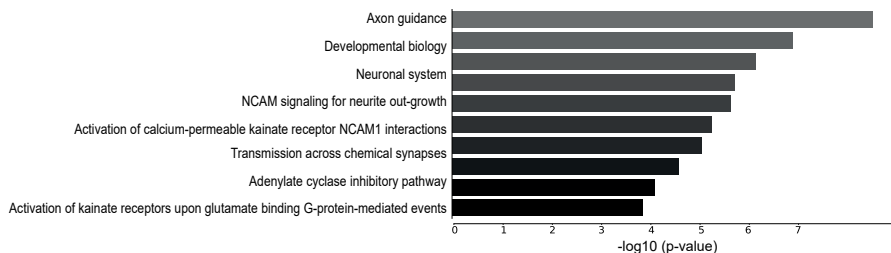

### GO Biological process of uBMS vs uPMS

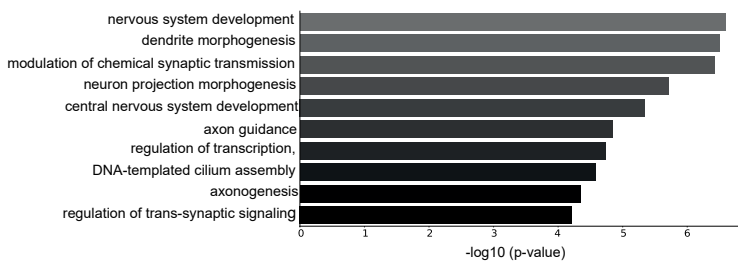

**Figure S5 (A) PCA plot of bulk RNAseq of mono-culture derived astrocytes show distinct segregation.** Samples were segregated according to patient group (PC1) and according to cytokine treatment vs control (PC2) **(B) Enrichr analysis of untreated BMS vs. PMS show activation of neuroprotective features.** BioPlanet 2019 pathway analysis showed activation of pathways related to axon guidance in BMS and GOs of biological processes were found in nervous system development.

TNF $\alpha$ /IL17 double dosage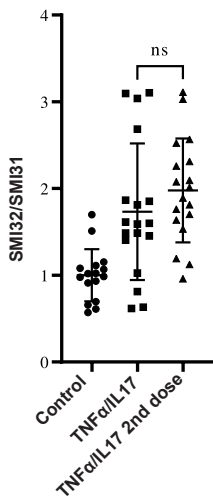

**Fig S6 TNF $\alpha$ /IL17 double dosage.** NGN2 monocultures neurons were treated with TNF $\alpha$ /IL17 (50ng each) for 24h. The next day neurons received a second dose of 20 ng TNF $\alpha$  and 8 ng of IL17 for 24h (measured concentrations in supernatants). No significant difference were seen between single and double-dosage treatment of TNF $\alpha$ /IL17. Each data point represents a microscopic field of view (641 x 479  $\mu$ m); pooled data from three independent experiments. Statistical significance was tested with a Kruskal-Wallis test.

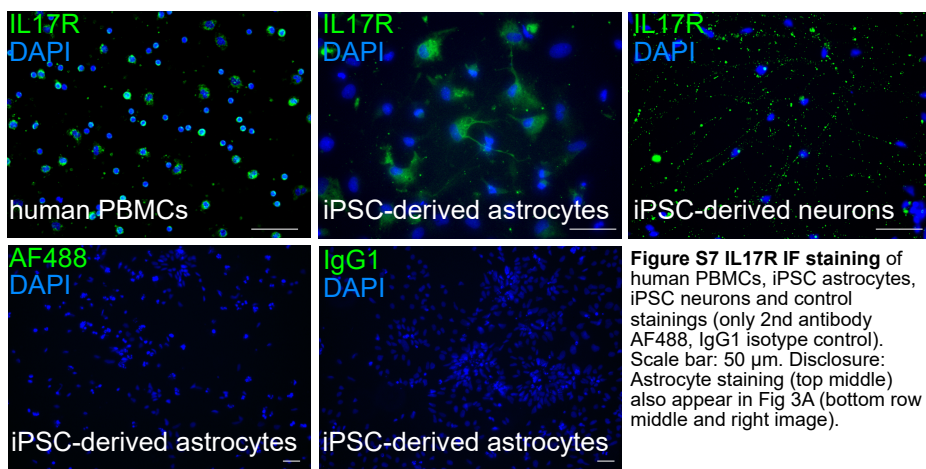

## Tofacitinib treatment on NGN2 monoculture

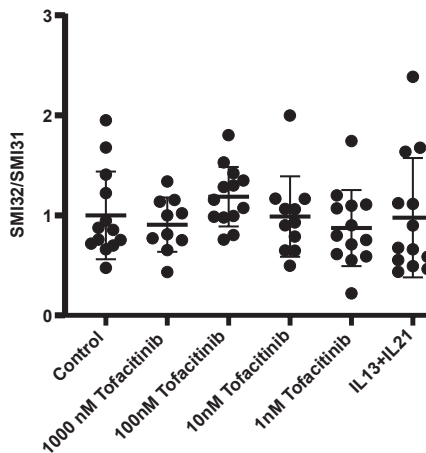

**Figure S8 Tofacitinib treatment of NGN2 monocultures.** Immunofluorescently stained SMI32/SMI31 NGN2 neurons were analysed with Imaris and presented as surface ratio of SMI32/SMI31+ SD and normalized to the control. Each data point represents a microscopic field of view (641 x 479  $\mu\text{m}$ ); pooled data from three independent experiments. No differences were seen after Tofacitinib treatment or IL-13 + IL-21 (50g/ml each) after 24h.

**Figure S9**

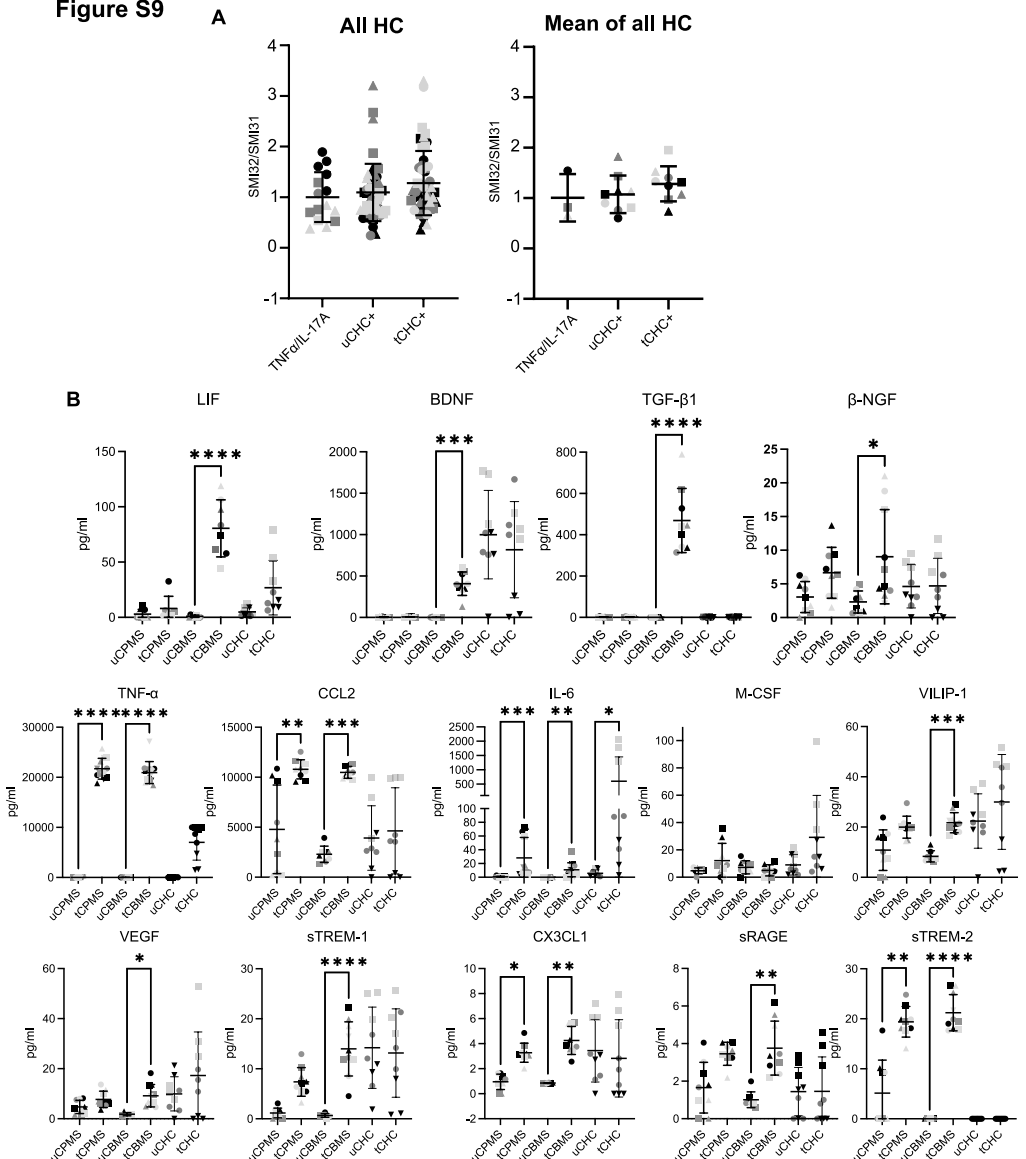

**Figure S9. Supernatant analysis of healthy control astrocytes with NGN2 neuron co-cultures** (A) NGN2 neurons were treated with TNF $\alpha$ /IL17A (50 ng/ml) for 24h (represented with "+") and medium was replaced with medium control, untreated- or treated co-culture supernatants from HC1-3. SMI32/SMI31 does not show significant reduction after treatment with HC supernatants (i.e. no reduction in neurite damage).

(B) Bead-based multiplex assay analysis of supernatants of HC1-3 (uCHC - untreated co-culture of HC astrocytes / NGN2 neurons; tCHC TNF $\alpha$ /IL17A treated co-cultures of HC astrocytes / NGN2 neurons) in comparison with MS supernatants (see Fig. 6). Each data point represents one sample of collectively three independent experiments. HC and MS supernatants have been measured in different experiments, therefore a batch effect between HC and MS cannot be ruled out. Statistical testing was only performed between treated/untreated samples of the same group. Similar symbols are used for the individual person's derived cultures.

Statistical significance was tested with Kruskal Wallis test. \* $p < 0.05$ , \*\*\* $p < 0.001$ , \*\*\*\* $p < 0.0001$ ; (IL-17A, IL-21, CTGF were not analysed),





|          |                   |          |                    |          |                    |          |                   |         |                   |        |                   |
|----------|-------------------|----------|--------------------|----------|--------------------|----------|-------------------|---------|-------------------|--------|-------------------|
| MDK.1    | 0.446170831972    | MYCN     | 0.43092085120878   | RP26     | 0.384949612417004  | RP23A    | 0.44500376581567  | COMM0.3 | 0.31277488542788  | MAAM2  | 0.6127748854396   |
| ROSS.1   | 0.665963949389    | TANC1    | 0.4067674055661    | F1R      | 0.38113615452979   | RP21.2   | 0.4526084005912   | CDXA    | 0.786283969447    | LAMA4  | 0.61265516652807  |
| TOB1     | 0.4359085290808   | FPAN.1   | 0.44753110384977   | R12      | 0.37108132725254   | RP26.2   | 0.45320484914014  | ATP9F.1 | 0.53088086666297  | IF10   | 0.61417007772406  |
| NCTN2    | 0.40002838064     | NRXN3    | 0.40011134706021   | NKX4.1   | 0.3706629592708    | RP26.1   | 0.45091031830497  | NRXN3   | 0.45091031830497  | MEK2.3 | 0.6130270124298   |
| CDMG     | 0.5255765213807   | PRML2    | 0.4497762122007    | R12      | 0.3661880800675    | RP27.2   | 0.4682787701387   | CDMG.1  | 0.61362427189505  | XIST   | 0.60630108812039  |
| PLOD4    | 0.3751151218899   | SNRP2    | 0.44712480011133   | FL1      | 0.3687355912135    | RP12.2   | 0.47499624208766  | GOT3.1  | 0.51022062385405  | VGII4  | 0.60381463846470  |
| TSPF     | 0.45225260311     | SNRP2.1  | 0.448306617150024  | PK1      | 0.3687355912135    | RP12.1   | 0.47499624208766  | CDG.1   | 0.49521190227598  | TBRM4  | 0.60381463846470  |
| ERAB11.1 | 0.4963939039449   | COL2A1   | 0.44143183745076   | RP1      | 0.36794387922577   | PR11.1   | 0.4999176439096   | DKX2    | 0.378468708459    | ANXA1  | 0.59519331917518  |
| PPFD     | 0.4120928849018   | MYO1A    | 0.43888888478712   | RP29     | 0.3631554247104    | RP18.1   | 0.50679000404375  | STX8    | 0.425556208949    | RKN1   | 0.59498454264617  |
| MFAP2    | 0.44601301101323  | MYO1B    | 0.4481625176014008 | RP1      | 0.3631554247104    | RP18.2   | 0.50679000404375  | STX8.1  | 0.425556208949    | CCDC1  | 0.59498454264617  |
| RM217    | 0.3147471790716   | LSM2.1   | 0.44610062323115   | RP18.1   | 0.36323310021085   | PDMA2    | 0.536611442051524 | PFM1    | 0.38491420882533  | GYPC   | 0.59720004882329  |
| CCD42P1  | 0.39369382104071  | SCY1     | 0.44797356308871   | RP12.1   | 0.35822702729279   | EF2.2    | 0.544726051782235 | FAM140B | 0.33222031393834  | ZIC1   | 0.59181744701588  |
| UMCK1    | 0.44601301101323  | MYO1B    | 0.4481625176014008 | RP1      | 0.3631554247104    | SR8      | 0.54509393142411  | SR8.1   | 0.54509393142411  | MYO1B  | 0.59181744701588  |
| EMF.1    | 0.49965162168189  | MYO2     | 0.44117416014986   | RP3      | 0.35006628718376   | RP41     | 0.5507809999121   | COMM10  | 0.3838046029817   | SYT11  | 0.590091523171207 |
| CDP1     | 0.50034592044799  | PTCH1    | 0.43719576994585   | RM3A     | 0.34786760546171   | SPAT     | 0.55944328687697  | PRDM13  | 0.53213486209794  | AHNAK2 | 0.58824884235629  |
| FN1      | 0.4732225769311   | SHR3C2   | 0.40211155971211   | RP11     | 0.3469017155971211 | DB1.2    | 0.561233190227598 | SKOR2   | 0.39792051791207  | FUT2   | 0.58788855666069  |
| NP4      | 0.764793804259683 | CD118    | 0.4055548601782    | RP14.1   | 0.3389700842793    | AGTR1A   | 0.5717720818654   | PIGKB1  | 0.31783205895034  | AP2P   | 0.58685334955458  |
| PHD2     | 0.34202314688886  | SOX1     | 0.37727872801973   | RP1      | 0.33243828366594   | GP8.1    | 0.61038622491899  | CT10F7  | 0.38620904917026  | DGRR1  | 0.58251381994473  |
| CAV1     | 0.34202314688886  | PHK.1    | 0.37727872801973   | RP2.5    | 0.320657675542108  | CS1      | 0.61038622491899  | PCNA1   | 0.38620904917026  | P4FB   | 0.58251381994473  |
| CAV1.1   | 0.3717953481717   | RP10.2   | 0.37009554178718   | RP57     | 0.33002270000000   | PNL2     | 0.621793066127473 | MM2.2   | 0.47497216761602  | LHFPL6 | 0.57929558287818  |
| CDN3     | 0.5802845846674   | RP57.2   | 0.329429320175308  | REST.1   | 0.329429320175308  | REST.1   | 0.62074039517854  | JM1.2   | 0.400498898491215 | CFP2   | 0.5778958685467   |
| CTE2.1   | 0.5164888455582   | HMGB2    | 0.38834004032078   | TP53.1   | 0.32222222207878   | TP53.1   | 0.61243232207878  | TP53.1  | 0.61243232207878  | EP8    | 0.5778958685467   |
| CDAD2    | 0.654967945522    | KAMP.3   | 0.38846575188888   | RP54     | 0.3230555782967    | RR4.4    | 0.6568932380891   | RAN.4   | 0.37842662053183  | CAD1   | 0.57642006323053  |
| VCL1     | 0.38758204979759  | RP52.2   | 0.31096150124441   | CAVIN1.4 | 0.32329949931416   | CAVIN1.4 | 0.68237874433008  | TMED1   | 0.31180845954663  | PEA15  | 0.57607322949887  |
| CTE1.1   | 0.5164888455582   | HMGB2    | 0.38834004032078   | TP53.1   | 0.32222222207878   | TP53.1   | 0.61243232207878  | TP53.1  | 0.61243232207878  | TP1    | 0.57607322949887  |
| MTCH1    | 0.5496582429285   | PDOS.3   | 0.45905144812093   | FRAT2    | 0.30767878466807   | NME1.1   | 0.71266843710498  | PMB6    | 0.31668409439078  | JUN    | 0.5679419439078   |
| SEPTIN7  | 0.44178092951538  | LAPTM4A  | 0.45879180201595   | FRAT1    | 0.30767878466807   | PDMA2.4  | 0.71266843710498  | PMB6.1  | 0.31668409439078  | ATP5F6 | 0.5679419439078   |
| FS1      | 0.4415288605371   | DSN2     | 0.4490811363381    | LDG2     | 0.30138538419471   | AHNAK.4  | 0.72513838839602  | CHGC1.1 | 0.28132610833951  | CA1    | 0.5640154846012   |
| FXN1     | 0.49841915507586  | RABAC1.2 | 0.42666691088705   | RP28     | 0.2783630021407    | CA1R.2   | 0.72783630021407  | MYO1F.1 | 0.3024782398864   | COL2A2 | 0.56371614979791  |
| ANXA1    | 0.3859188180585   | ANXA1.1  | 0.40760718120598   | RP25     | 0.29898101474743   | UMC1.2   | 0.7322920171284   | RC3H1   | 0.32485057902008  | PHLAD1 | 0.55991626110718  |
| UMC1     | 0.3859188180585   | ANXA1.1  | 0.40760718120598   | RP25     | 0.29898101474743   | UMC1.2   | 0.7322920171284   | RC3H1   | 0.32485057902008  | PHLAD1 | 0.55991626110718  |
| LGALS1   | 0.4841394757841   | AP1S2    | 0.370137184058.3   | RP28     | 0.28087130821945   | CA10.4   | 0.739567619139    | EP1.3   | 0.3395870221673   | SORBS2 | 0.5699456100748   |
| LAMA2    | 0.30310674814552  | OPN2     | 0.4322535992216    | CCD109   | 0.27088400728452   | NP2.3    | 0.7754072115786   | PF20F.2 | 0.33022951299475  | TMOD3  | 0.5553464360879   |
| ND5      | 0.4524632731865   | PDLIM1.1 | 0.40855651493916   | OSTA.1   | 0.27088400728452   | NP2.3    | 0.7754072115786   | PF20F.2 | 0.33022951299475  | TMOD3  | 0.5553464360879   |
| LAMA1    | 0.30310674814552  | OPN2     | 0.4322535992216    | CCD109   | 0.27088400728452   | NP2.3    | 0.7754072115786   | PF20F.2 | 0.33022951299475  | TMOD3  | 0.5553464360879   |
| ANXA2    | 0.4632874841488   | PHLAD1.2 | 0.40222172151306   | TMEM81.1 | 0.25039196251294   | QSOX1    | 0.788433890042    | MYT1S1  | 0.30120670010217  | GUPR1  | 0.551761778469    |
| PH1      | 0.45024991972842  | CD44     | 0.42624878066352   | CD44.2   | 0.42624878066352   | CD44.2   | 0.42624878066352  | CD44.2  | 0.42624878066352  | GUPR1  | 0.551761778469    |
| EMF.2    | 0.49965162168189  | MYO2     | 0.44117416014986   | RP3      | 0.35006628718376   | RP41     | 0.5507809999121   | COMM10  | 0.3838046029817   | SYT11  | 0.590091523171207 |
| NP21     | 0.2652024376767   | TMBS10.2 | 0.4882546142911    | CNN3.2   | 0.52620982043942   | EP10.1   | 0.863626682649    | ATPC    | 0.34029442183834  | CS7B   | 0.53456797010065  |
| FN1.1    | 0.4732225769311   | SHR3C2   | 0.40211155971211   | RP11     | 0.3469017155971211 | DB1.2    | 0.561233190227598 | SKOR2   | 0.39792051791207  | FUT2   | 0.58788855666069  |
| EPN1     | 0.49965162168189  | MYO2     | 0.44117416014986   | RP3      | 0.35006628718376   | RP41     | 0.5507809999121   | COMM10  | 0.3838046029817   | SYT11  | 0.590091523171207 |
| DDP      | 0.3884074372602   | FL2      | 0.31096150124441   | CAVIN1.4 | 0.32329949931416   | CAVIN1.4 | 0.68237874433008  | TMED1   | 0.31180845954663  | PEA15  | 0.57607322949887  |
| NP21.1   | 0.501520376437    | TP10.2   | 0.37009554178718   | RP57     | 0.33002270000000   | PNL2     | 0.621793066127473 | MM2.2   | 0.47497216761602  | LHFPL6 | 0.57929558287818  |
| CFP1     | 0.4402794121295   | HMGB1.3  | 0.45879180201595   | FRAT1    | 0.30767878466807   | NME1.1   | 0.71266843710498  | PMB6    | 0.31668409439078  | JUN    | 0.5679419439078   |
| NP21.2   | 0.501520376437    | TP10.2   | 0.37009554178718   | RP57     | 0.33002270000000   | PNL2     | 0.621793066127473 | MM2.2   | 0.47497216761602  | LHFPL6 | 0.57929558287818  |
| NP21.3   | 0.501520376437    | TP10.2   | 0.37009554178718   | RP57     | 0.33002270000000   | PNL2     | 0.621793066127473 | MM2.2   | 0.47497216761602  | LHFPL6 | 0.57929558287818  |
| NP21.4   | 0.501520376437    | TP10.2   | 0.37009554178718   | RP57     | 0.33002270000000   | PNL2     | 0.621793066127473 | MM2.2   | 0.47497216761602  | LHFPL6 | 0.57929558287818  |
| NP21.5   | 0.501520376437    | TP10.2   | 0.37009554178718   | RP57     | 0.33002270000000   | PNL2     | 0.621793066127473 | MM2.2   | 0.47497216761602  | LHFPL6 | 0.57929558287818  |
| NP21.6   | 0.501520376437    | TP10.2   | 0.37009554178718   | RP57     | 0.33002270000000   | PNL2     | 0.621793066127473 | MM2.2   | 0.47497216761602  | LHFPL6 | 0.57929558287818  |
| NP21.7   | 0.501520376437    | TP10.2   | 0.37009554178718   | RP57     | 0.33002270000000   | PNL2     | 0.621793066127473 | MM2.2   | 0.47497216761602  | LHFPL6 | 0.57929558287818  |
| NP21.8   | 0.501520376437    | TP10.2   | 0.37009554178718   | RP57     | 0.33002270000000   | PNL2     | 0.621793066127473 | MM2.2   | 0.47497216761602  | LHFPL6 | 0.57929558287818  |
| NP21.9   | 0.501520376437    | TP10.2   | 0.37009554178718   | RP57     | 0.33002270000000   | PNL2     | 0.621793066127473 | MM2.2   | 0.47497216761602  | LHFPL6 | 0.57929558287818  |
| NP21.10  | 0.501520376437    | TP10.2   | 0.37009554178718   | RP57     | 0.33002270000000   | PNL2     | 0.621793066127473 | MM2.2   | 0.47497216761602  | LHFPL6 | 0.57929558287818  |
| NP21.11  | 0.501520376437    | TP10.2   | 0.37009554178718   | RP57     | 0.33002270000000   | PNL2     | 0.621793066127473 | MM2.2   | 0.47497216761602  | LHFPL6 | 0.57929558287818  |
| NP21.12  | 0.501520376437    | TP10.2   | 0.37009554178718   | RP57     | 0.33002270000000   | PNL2     | 0.621793066127473 | MM2.2   | 0.47497216761602  | LHFPL6 | 0.57929558287818  |
| NP21.13  | 0.501520376437    | TP10.2   | 0.37009554178718   | RP57     | 0.33002270000000   | PNL2     | 0.621793066127473 | MM2.2   | 0.47497216761602  | LHFPL6 | 0.57929558287818  |
| NP21.14  | 0.501520376437    | TP10.2   | 0.37009554178718   | RP57     | 0.33002270000000   | PNL2     | 0.621793066127473 | MM2.2   | 0.47497216761602  | LHFPL6 | 0.57929558287818  |
| NP21.15  | 0.501520376437    | TP10.2   | 0.37009554178718   | RP57     | 0.33002270000000   | PNL2     | 0.621793066127473 | MM2.2   | 0.47497216761602  | LHFPL6 | 0.57929558287818  |
| NP21.16  | 0.501520376437    | TP10.2   | 0.37009554178718   | RP57     | 0.33002270000000   | PNL2     | 0.621793066127473 | MM2.2   | 0.47497216761602  | LHFPL6 | 0.57929558287818  |
| NP21.17  | 0.501520376437    | TP10.2   | 0.37009554178718   | RP57     | 0.33002270000000   | PNL2     | 0.621793066127473 | MM2.2   | 0.47497216761602  | LHFPL6 | 0.57929558287818  |
| NP21.18  | 0.501520376437    | TP10.2   | 0.37009554178718   | RP57     | 0.33002270000000   | PNL2     | 0.621793066127473 | MM2.2   | 0.47497216761602  | LHFPL6 | 0.57929558287818  |
| NP21.19  | 0.501520376437    | TP10.2   | 0.37009554178718   | RP57     | 0.33002270000000   | PNL2     | 0.621793066127473 | MM2.2   | 0.47497216761602  | LHFPL6 | 0.57929558287818  |
| NP21.20  | 0.501520376437    | TP10.2   | 0.37009554178718   | RP57     | 0.33002270000000   | PNL2     | 0.621793066127473 | MM2.2   | 0.47497216761602  | LHFPL6 | 0.57929558287818  |
| NP21.21  | 0.501520376437    | TP10.2   | 0.37009554178718   | RP57     | 0.33002270000000   | PNL2     | 0.621793066127473 | MM2.2   | 0.47497216761602  | LHFPL6 | 0.57929558287818  |
| NP21.22  | 0.501520376437    | TP10.2   | 0.37009554178718   | RP57     | 0.33002270000000   | PNL2     | 0.621793066127473 | MM2.2   | 0.47497216761602  | LHFPL6 | 0.57929558287818  |
| NP21.23  | 0.501520376437    | TP10.2   | 0.37009554178718   | RP57     | 0.33002270000000   | PNL2     | 0.621793066127473 | MM2.2   | 0.47497216761602  | LHFPL6 | 0.57929558287818  |
| NP21.24  | 0.501520376437    | TP10.2   | 0.37009554178718   | RP57     | 0.33002270000000   | PNL2     | 0.621793066127473 | MM2.2   | 0.47497216761602  | LHFPL6 | 0.57929558287818  |
| NP21.25  | 0.501520376437    | TP10.2   | 0.37009554178718   | RP57     | 0.33002270000000   | PNL2     | 0.621793066127473 | MM2.2   | 0.47497216761602  | LHFPL6 | 0.5792            |









|           |                    |           |                    |           |                    |           |                     |           |                    |
|-----------|--------------------|-----------|--------------------|-----------|--------------------|-----------|---------------------|-----------|--------------------|
| EFA42.1   | -0.39399727388819  | CFP90     | -0.39598100840351  | CDG.3     | -0.26506014860712  | RPLP0.5   | -0.30999789533461   | F2R       | 0.3504254351468    |
| NK1       | 0.28283570495921   | SF8P4     | -0.27947488129509  | PRKDC.3   | -0.32785072724645  | CWC15     | 0.4303051282388     | PMPA1P    | -0.46129658989579  |
| BCDP      | 0.20028221187452   | S1BR1     | 0.21734200881124   | SLC4A3.3  | -0.28720824481063  | TPRAC5.1  | -0.35709833249082   | CCDC8B    | 0.25274963074243   |
| RPF1      | 0.29205093127446   | HADA2.1   | -0.28505008477124  | PKX.1     | -0.3251420497786   | PKL4      | -0.3251420497786    | PKL4      | -0.3251420497786   |
| DYSL3.2   | -0.3804878155746   | NSD1      | -1.2789256450582   | NSD1.2    | -0.3804878155746   | NSD1.3    | -0.3804878155746    | NSD1.4    | -0.3804878155746   |
| PCNT3     | 0.27170746024274   | ULB3      | -0.2898838458355   | STAT3.3   | -0.35429031012123  | ANKK1D.3  | 0.05091394423169    | EBF1      | 0.3602062252222    |
| ATPA6P.2  | 0.2551746454002    | JKCC1     | 0.28231649803492   | AKT6L.1   | -0.3090712417344   | GHC4P.2   | -0.28231649803492   | AKP4B     | -0.3090712417344   |
| YFP3.2    | -0.28073772027946  | PHF6      | -0.30476567947507  | HSF1.2    | -0.28383180148706  | CRMPL.4   | -0.28073772027946   | VDAC3     | -0.33861067052784  |
| BR1.2     | 0.20146388286211   | THM21B.1  | -0.10114131020779  | PHACTR1.2 | -0.34146891468972  | GTP7L.4   | -0.58583121056989   | TMED3     | 0.31368380766332   |
| CDND5.2   | 0.30113564628857   | TAD3.1    | -0.28510081351346  | TAD3.2    | -0.25447317831724  | PKNO.2    | -0.35931374131992   | MTN1D3    | -0.35931374131992  |
| ADPVD1.1  | -0.27329116492583  | PHF9.2    | 0.26793742112318   | TLES      | -0.296383630114    | NP0D1     | 0.48466249512047    | RAO23B    | -0.317308883217    |
| CCDC4     | 0.2603338904542    | PHF2.2    | 0.36243489104041   | EFSA.4    | -0.29631351931423  | CHK2L.2   | -0.37463327515219   | MG3F3     | 0.2460009751285    |
| HFE.1     | -0.2120344220177   | MRP2      | -0.21127176836916  | MAP1B.1   | -0.21127176836916  | MAP1B.2   | -0.21127176836916   | MAP1B.3   | -0.21127176836916  |
| SUMO3     | 0.2616542800789    | HMC5C1    | -0.46771319311932  | COAD2.1   | -0.39900102519471  | SPF3.3    | -0.51362969768861   | SRF1      | -0.35681153688861  |
| SPF1A1.1  | -0.34794576969096  | HSF6A.1   | 0.33017347187188   | EF3D      | -0.29153138473975  | COX2D1    | 0.40600687209883    | TBRL1     | -0.34841131424546  |
| BCAL1     | 0.21199111628255   | GNG3      | 0.28231649803492   | ATAD2     | -0.31514150361563  | ZMAT3.2   | -0.31514150361563   | PRK11     | -0.31514150361563  |
| GPC.2     | -0.41153067515172  | FAM17A1.1 | -0.31658978156169  | FAM162A.1 | -0.27810275825477  | PP1C.5    | -0.30999919800758   | NOVA1     | -0.6367088494185   |
| PEA13.3   | -0.35936120789641  | SRG5.1    | -0.2788688841156   | ZMAT3.2   | -0.31514150361563  | UAPL4     | -0.30999919800758   | FMA       | 0.3024868854035    |
| SACD1     | 0.31208597390388   | GNG3      | 0.28231649803492   | ATAD2     | -0.31514150361563  | SEL1L.2   | -0.4041126178205959 | TPS31.2   | -0.30020781714028  |
| LRP1.2    | -0.32981241144148  | NUCB2.1   | -0.2368219203834   | CDN1A.4   | -0.677466258181927 | FXR3.5    | -0.39431894854989   | HDFG3.3   | -0.3493647789826   |
| UPP1.3    | -0.4783702329608   | ZNF58     | -0.30054648284233  | KNP1.3    | -0.3993925346602   | ARBP3.3   | 0.3993925346602     | MTCH2     | -0.3691516182833   |
| CCND3.2   | 0.25007014949859   | TPSN1A.1  | -0.24848089966829  | IFP21.1   | -0.26009191578584  | PYK2.2    | -0.3929161210757    | PNP       | -0.3088151085627   |
| CALB1.2   | 0.45464002321776   | PKM.1     | -0.25503790201565  | SPO1.1    | -0.27496745605808  | EFNA3.5   | -0.3739312087017    | UZB1N     | -0.32106219530454  |
| CTNNA1    | -0.28081972941233  | RHO2B.2   | -0.3334454099959   | GRN2      | -0.32138521815429  | RABL2.2   | -0.44613920877407   | CYTM1     | 0.3600431184515    |
| BR1.2     | 0.20146388286211   | NEF1.1    | -0.45774054412491  | FLVCR1.1  | -0.2881385096465   | GTF2J.3   | -0.45948737002448   | DNAH3     | -0.31037116441114  |
| CFSC.3    | 0.25464002321776   | WDR11.1   | -0.245232826661    | MYR4C.2   | -0.28602819604706  | BARD1.3   | -0.381169658297     | PLD3      | -0.340486958297    |
| DOT.2     | -0.2504950451552   | FNDC3B.1  | -0.312187465623    | FN1.1     | -0.3567050360239   | TNND1.1   | 1.0981007125469     | JAG1      | 0.3800117931902    |
| CKC2      | 0.25007014949859   | TPSN1A.1  | -0.24848089966829  | CFBP3.1   | -0.2851998205648   | SYNPO.3   | 0.29561852087051    | SAGEB1.1  | 0.29561852087051   |
| ZND6      | 0.25007014949859   | TPSN1A.1  | -0.24848089966829  | RALGDS    | 0.25008995757887   | RALGDS    | 0.25008995757887    | PAN.5     | -0.3121126195882   |
| SAB       | 0.2645649674736    | YBX1.1    | 0.31287279540252   | DNMT1.2   | -0.2973203895478   | ARL4S.5   | 0.4707620896953     | EFNA5     | -0.3264731620764   |
| TEAL8     | -0.26273982989009  | CTP1.1    | -0.25048124203891  | SVL3      | -0.44501001910232  | CKD16     | 0.447470182801      | RFC3      | -0.2792680304646   |
| LAMP1.2   | 0.28974021415004   | FAM181.1  | -0.28974021415004  | FAM181.2  | -0.28974021415004  | FAM181.3  | -0.28974021415004   | MAP2G1    | -0.28974021415004  |
| YDC       | 0.286086313111     | PDI1      | -0.380082771734673 | CD47.4    | -0.380082771734673 | RPL6.1    | -0.29640766966666   | SLCB3A1   | -0.34063131917105  |
| UPP2.2    | -0.26170132903269  | PIHF      | -0.2645488218435   | BNP3L.1   | -0.33327340480384  | TRIM24.2  | -0.40613466139424   | PGRFP1    | 0.2727400290633    |
| TRP1.1    | 0.3211020776208    | TRP1.2    | 0.3211020776208    | TRP1.3    | 0.3211020776208    | TRP1.4    | 0.3211020776208     | TRP1.5    | 0.3211020776208    |
| NAT10     | 0.2343475268541    | MAP3K13   | -0.30064910050306  | AKR7A2    | -0.25786588826663  | RPL71.1   | 0.24272926721151    | CRSP1D1   | 0.3087240152128    |
| TOP1      | 0.27821431161657   | IFP2A2.1  | -0.34614842888109  | DAO3.3    | -0.2940018111069   | FAM174C.1 | 0.49190114178104    | MGM1      | 0.2789071759841    |
| ANAPC1    | 0.21408717897628   | TRP1.1    | 0.3211020776208    | TRP1.2    | 0.3211020776208    | TRP1.3    | 0.3211020776208     | TRP1.4    | 0.3211020776208    |
| CHMP2A    | -0.25987863280443  | MTL19     | -0.28858664420564  | SAR1A.1   | -0.25752813798822  | CECR3.2   | -0.3490093191001    | CANP2     | 0.2700748055667    |
| CHORDC1   | 0.24848089966829   | IMPFD2H.1 | 0.24848089966829   | MTM15.1   | -0.2553380183536   | JPK1.1    | 0.512473980191001   | MICB      | 0.27430281899548   |
| HAC1.3    | -0.300050428872    | CHMP1.1   | -0.300050428872    | CHMP1.2   | -0.300050428872    | CHMP1.3   | -0.300050428872     | CHMP1.4   | -0.300050428872    |
| COP3.2    | -0.26684348746833  | SBP2      | -0.26684348746833  | MEF1      | -0.25182286439908  | NAV1.2    | -0.25182286439908   | PHGDH     | -0.3358251240649   |
| ANKK3.3   | -0.3041920197996   | EVN1      | -0.30205752757089  | YPL3      | 0.26401934251193   | PABP1C.3  | 0.43696946622459    | NUDT2     | -0.3254251888769   |
| ANAPC5    | -0.2491450208713   | CHMP1.1   | -0.300050428872    | CHMP1.2   | -0.300050428872    | CHMP1.3   | -0.300050428872     | CHMP1.4   | -0.300050428872    |
| ANAPC6    | 0.25179951440019   | CENL.2    | -0.26054455867727  | SMAD5     | -0.26054455867727  | NGFR1.3   | -0.56580931729848   | STRAP     | -0.28251298194845  |
| FEZ2      | -0.30331251293755  | ARHGAP4   | -0.31911975062316  | NAO2      | -0.2640604009084   | CHP1.3    | -0.25072050037001   | NERF3     | -0.5234600848984   |
| HCFR1.1   | -0.27305147110061  | ASC1.1    | -0.27305147110061  | ASC1.2    | -0.27305147110061  | ASC1.3    | -0.27305147110061   | ASC1.4    | -0.27305147110061  |
| ACT10     | -0.28533026411898  | MAN1A2    | -0.274810914664177 | FXYD6.1   | 0.54471780208129   | ACT11.2   | 0.49510785142482    | NPDC1     | 0.27807698743248   |
| DNAH21.1  | -0.21471912442485  | FAM202D.1 | -0.21471912442485  | FAM202D.2 | -0.21471912442485  | FAM202D.3 | -0.21471912442485   | FAM202D.4 | -0.21471912442485  |
| SLC16A1.2 | 0.2553396200882    | POLM1.2   | -0.2553396200882   | DRAP1.2   | -0.2553396200882   | OTX4      | 0.30059518718142    | PKM       | 0.2820039086835    |
| TMED10.2  | -0.2677480112589   | APF       | -0.2677480112589   | EFY3J     | -0.28934507408016  | BTCL1     | -0.38467993032878   | C1orf75   | 0.2769256444883    |
| TRP1.1    | 0.3211020776208    | TRP1.2    | 0.3211020776208    | TRP1.3    | 0.3211020776208    | TRP1.4    | 0.3211020776208     | TRP1.5    | 0.3211020776208    |
| GTBP4.1   | 0.306414569870162  | PFAH1B1   | -0.31289093811547  | ITGB1B1.1 | -0.27438929755633  | ARL1.1    | -0.27438929755633   | LAMTOR1   | 0.35079168560238   |
| GRM6B.3   | -0.2823860539581   | FAM204A   | -0.2823860539581   | KRT10.2   | -0.3087468825092   | JARID2    | -0.41564920484146   | SESG1A    | 0.32599351589111   |
| DNAH21.1  | -0.21471912442485  | CAVNL1.2  | -0.21471912442485  | AGO1.1    | -0.31581007950067  | UTR1.2    | -0.484918015841209  | UBR1      | -0.484918015841209 |
| CCO4.2    | -0.258821898639784 | CPBP1.1   | -0.258821898639784 | AGO2.1    | -0.31581007950067  | AGO2.2    | -0.31581007950067   | AGO2.3    | -0.31581007950067  |
| FRP1B     | -0.2828478483848   | MEK3A.1   | -0.2828478483848   | ATP5F1A.1 | 0.3182910178511    | MDM2.3    | 0.30348683238833    | ATP7B1    | 0.40538091902485   |
| CLTB      | -0.26125131704025  | TPS3B.1   | -0.31285411084172  | ENO1      | 0.30080084939111   | INC04G1.3 | 0.66781032722622    | EPH2B     | 0.2717046482115    |
| KLHL3     | 0.26707044119353   | TRAF1.1   | -0.26707044119353  | TRAF1.2   | -0.26707044119353  | TRAF1.3   | -0.26707044119353   | TRAF1.4   | -0.26707044119353  |
| CD3D      | 0.3066212321088    | MFN1      | -0.27893794102561  | KDM1A.2   | -0.35469921547388  | CDM1.2    | -0.41908516715555   | OLA1      | -0.31638717068897  |
| XPO1      | 0.21076037472484   | TRP1.1    | 0.3211020776208    | TRP1.2    | 0.3211020776208    | TRP1.3    | 0.3211020776208     | TRP1.4    | 0.3211020776208    |
| TRP1.1    | 0.3211020776208    | TRP1.2    | 0.3211020776208    | TRP1.3    | 0.3211020776208    | TRP1.4    | 0.3211020776208     | TRP1.5    | 0.3211020776208    |
| MTM179.1  | -0.25807817479123  | ADD1      | -0.25807817479123  | ADD1.2    | -0.25807817479123  | ADD1.3    | -0.25807817479123   | ADD1.4    | -0.25807817479123  |
| COM3      | 0.60082782456435   | LAMC1.1   | -0.37176915047099  | PRH1.1    | -0.28082647488825  | PRK4.1    | 0.49710789351583    | CHK1      | -0.31903807048031  |
| AMP1.3    | 0.30548078818459   | TRP1.1    | 0.3211020776208    | TRP1.2    | 0.3211020776208    | TRP1.3    | 0.3211020776208     | TRP1.4    | 0.3211020776208    |
| THY1      | -0.271251010386    | SRGAP1    | -0.2812989885195   | HADB1.1   | -0.25786592644019  | VIMN2B.2  | -0.37749277994876   | COL18A1   | -0.27870591487967  |
| H16.1     | -0.27788480202076  | PLP1.1    | -0.27788480202076  | CIORP.3   | -0.3500295474414   | CCO4A.4   | -0.32965019420171   | BTFL4     | -0.30281894044621  |
| HNF4A.2   | -0.33928084581509  | TRP1.1    | 0.3211020776208    | TRP1.2    | 0.3211020776208    | TRP1.3    | 0.3211020776208     | TRP1.4    | 0.3211020776208    |
| TRAP1.1   | 0.21340514048002   | LRP1      | -0.27974412646729  | NUDC1F    | -0.25824067346627  | RA1A1.1   | -0.4587166400024    | STRP      | -0.3099651425202   |
| BK1.2     | -0.489832947016    | AKK2      | -0.28960070447029  | DKC1.3    | -0.28942041371002  | PKOJX     | 0.50126156840082    | SMARCA4   | -0.3846246409984   |
| NFKB1.2   | -0.301540015389    | TRP1.1    | 0.3211020776208    | TRP1.2    | 0.3211020776208    | TRP1.3    | 0.3211020776208     | TRP1.4    | 0.3211020776208    |
| DAD1.2    | -0.25968304901552  | RTP2      | -0.2697208028626   | G8P2.1    | -0.32639745323975  | YWH43.3   | 0.47421176124468    | DAD2P1    | -0.3195413244737   |
| ID1       | -0.2762780820469   | IRF1      | -0.3519538840971   | TEL1      | -0.41560870209194  | YWH43.3   | 0.47421176124468    | MC46      | -0.31692050683385  |
| AP1       | 0.2172559215454    | TRP1.1    | 0.3211020776208    | TRP1.2    | 0.3211020776208    | TRP1.3    | 0.3211020776208     | TRP1.4    | 0.3211020776208    |
| TRP1.1    | 0.3211020776208    | TRP1.2    | 0.3211020776208    | TRP1.3    | 0.3211020776208    | TRP1.4    | 0.3211020776208     | TRP1.5    | 0.3211020776208    |
| PHF40A.1  | -0.28542799291952  | GGM1      | -0.28542799291952  | TRAP1.2   | -0.29012544923031  | POU5F1.5  | 1.17395070447474    | SECE2     | 0.26064761878418   |
| TRP1.1    | 0.3211020776208    | TRP1.2    | 0.3211020776208    | TRP1.3    | 0.3211020776208    | TRP1.4    | 0.3211020776208     | TRP1.5    | 0.3211020776208    |
| AD1D1     | -0.21917915546093  | PHL1.1    | -0.20984274898954  | DNH3E.1   | 0.3235164794237    | HLA-E.1   | 0.32424018455011    | CHCHD5    | 0.27820780937447   |
| HURP1D1.2 | -0.2862302018924   | NSD1.1    | -0.2862302018924   | NSD1.2    | -0.2862302018924   | NSD1.3    | -0.2862302018924    | NSD1.4    | -0.2862302018924   |
| BAO.2     | -0.2880054002765   | GNM1.1    | -0.2904839979944   | HPH2A.2   | -0.31257895454507  | MRP2.2    | -0.4876             |           |                    |

|          |                   |                   |                    |               |                     |            |                    |
|----------|-------------------|-------------------|--------------------|---------------|---------------------|------------|--------------------|
| SCG3.2   |                   | -0.26464743687516 | MANF               | SLFN1         | 0.34878176126171    | PAFAH8B3   | -0.42210144790775  |
| NREP.1   | -0.25817451905716 | SBP2.1            | 0.11974754888008   | UBN4.2        | 0.1747548187389     | SRP1       | -0.4177400303049   |
| PTX1.1   | -0.24406772124096 | CNN1L             | -0.24648623988053  | UBX2.3        | -0.13669887264026   | ANCY       | -0.37427272810529  |
| SOX11    | 0.25460721131848  | PL1.2             | -0.26545892000087  | NTK2.2        | 0.13447164224786    | BKCG.2     | -0.3622700192466   |
| TUBA1A.1 | -0.24805297316931 | RSF1              | -0.27441854907389  | NMCE4A.1      | -0.29149705939339   | FASN       | -0.34513073983052  |
|          |                   | FTSL1.1           | 0.26417692052062   | OTD1.1        | -0.12414262800303   | POD6       | 0.25301912914019   |
|          |                   | KF5A              | -0.20791743079066  | AMT.4         | -0.14431811312281   | POU3F3     | -0.2684366648024   |
|          |                   | KF3A              | -0.25077684272638  | IFGB5.1       | -0.40402339702082   | NAAS1      | -0.30813984513218  |
|          |                   | AP12.1            | -0.30780278438507  | FTX           | 0.15194122884791    | TRAF2      | 0.17678409296473   |
|          |                   | TAC1              | -0.3679002249474   | IRS.2         | -0.15102296545476   | TRAF3      | -0.31402849071046  |
|          |                   | FGFBP.2           | -0.354267819893006 | POU2L1        | -0.25220052388491   | TPSN3      | 0.27914579431307   |
|          |                   | MYCBP2            | -0.30720789494122  | DUT1.1        | -0.28819718181393   | CHOD3      | -0.28913340179486  |
|          |                   | SFRP.1            | -0.17055412151155  | CTE1          | 0.13802464555912    | USP2V.2    | -0.24131414141414  |
|          |                   | CHOD              | -0.267283994633961 | MMD           | 0.13120888574473    | SFRN1      | -0.28216031455222  |
|          |                   | GAO45A.1          | -0.31291318621495  | HNNP3A.1      | -0.28606500538241   | SFRN1P1    | 0.28062780084098   |
|          |                   | IFG4G             | -0.25501701182289  | HNS1C.1       | -0.286295201239771  | CEB2       | -0.286295201239771 |
|          |                   | RPL2L1            | 0.332862798681878  | DMH4.1        | 0.324588909760886   | MDM1       | -0.26811840495175  |
|          |                   | ITSM1.1           | -0.284447490426309 | RAN.3         | -0.266107350660857  | RRM1       | -0.404846273187269 |
|          |                   | ATM12B.1          | -0.25450147449314  | SAR.2         | 0.12709861207546    | EWRS1      | -0.314028819153131 |
|          |                   | ZNF92             | -0.279487366449257 | FLOT1         | 0.29231012213619    | VMP1       | 0.25008737406408   |
|          |                   | TRAF2F12.2        | -2.0473965525428   | DUSP4         | 0.289776097346039   | CS3RA7     | 0.297246749618     |
|          |                   | VAL1              | -0.25192347836982  | GNB1.1        | 0.3321005158837     | CEB1       | -0.263078819153131 |
|          |                   | CU1               | -0.547013885287481 | GNAQ          | 0.388750730831543   | HELI       | -0.48216492591532  |
|          |                   | NTR               | -0.26888827224729  | PPF2K         | 0.2864080407897     | MTRN2L     | -0.307338981139    |
|          |                   | SOD2              | -1.1420731474697   | CCND14N.4S1.1 | 0.2753683372782     | ELAVL1     | -0.2773504965379   |
|          |                   | LAMP1.1           | -0.251204238246307 | INAF1.1       | 0.35817983038746    | SMC5       | 0.30868490743213   |
|          |                   | CNTNAP.1          | -0.467653880169429 | CAMK2         | 0.38882823844417    | RAP2A      | -0.27779980267576  |
|          |                   | CNS1.1            | -0.253990579098304 | CBX3          | 0.263547633322      | NOCL1      | -0.38011691650073  |
|          |                   | PSME2.1           | -0.41789866210558  | MTX2.1        | 0.2860161440297     | SEC1IC     | -0.34940304401641  |
|          |                   | HGFBP1.1          | -1.0280489551486   | SCBP1A.1      | 0.30192700437166    | NFR        | -0.30621239061166  |
|          |                   | KF5R1.1           | -0.2840380711802   | KF5R1.1       | -0.25717311842835   | TRAF2      | -0.302402302895    |
|          |                   | MTNDS.2           | -0.476281641593538 | CNTNAP2.3     | -0.52978926557763   | RAO1C      | -0.3071027605026   |
|          |                   | PMP1A1.1          | -0.3039638323257   | INP           | 0.262881431431      | ECT2       | -0.2522288306262   |
|          |                   | SOD1A.1           | -0.148181791201728 | AKR8A         | 0.28738661190783    | TRAF3      | -0.286436648304    |
|          |                   | DPF1L3.1          | -0.38390462131795  | SCOC.2        | 0.31653820337972    | SPAG16     | 0.2536035045496    |
|          |                   | KCNK10F1.1        | -0.46662900770792  | DCTPP1.1      | -0.26248053964208   | EPHA11.2   | -0.285027628883046 |
|          |                   | MYL12A.2          | -0.25522640496819  | ADAM10.1      | 0.24615108119495    | ADPH1A     | -0.2942881071079   |
|          |                   | HSPB1.2           | -0.2400488475984   | HNNP4A.4      | -0.31279476550075   | COMT       | 0.3008812532309    |
|          |                   | MTNRX1L2.2        | -0.409374952047047 | FKBP1B.1      | 0.3151067508463     | PABPC4     | -0.37420683053398  |
|          |                   | NCAM1.2           | -0.402587751425005 | SCD10.1       | -0.287090951620749  | ACTO13     | -0.27434800216267  |
|          |                   | ELAVL3.2          | -0.402488751425005 | ATAT1         | 0.25373306411547    | CTSD       | 0.315125061457435  |
|          |                   | NSGARA.2          | -0.34360780122641  | AKR4          | -0.25617002615123   | CCP        | -0.2942881071079   |
|          |                   | PPFR3.1           | -0.296868128606083 | DOCS1         | 0.367711413613017   | MT-ATF8    | -0.4193847717999   |
|          |                   | SODC1             | -0.28295241042767  | TUBA1B.3      | -0.320947808358483  | TMA16      | -0.289640849760129 |
|          |                   | RGS12             | -0.48334348429656  | ENP2.2        | 0.36113631956565    | PKR3       | -0.295057823145    |
|          |                   | IGKC.CC.2         | -0.437016126105695 | KL12.2        | 0.292369405607948   | SNNP25     | -0.3009596040094   |
|          |                   | SESN1.1           | -0.302689912912125 | TPN1.1        | -0.26062100947122   | CHST4.4    | -0.32349981286259  |
|          |                   | FTL1              | -0.5119480203745   | CCDC8A.1      | 0.3143500624200997  | MSH4       | -0.31523046520202  |
|          |                   | INAL2             | -0.646793408872005 | RPN19A.4      | -0.408843850469133  | TMEM10     | -0.26139728911104  |
|          |                   | HGFBP11.1         | -0.32778862565881  | IPO7          | -0.258599849897     | FAM138B    | -0.27942053862016  |
|          |                   | ATF2B             | -0.448122979397074 | AKR1B1        | 0.29512074620426    | DSG10C     | -0.2950278633388   |
|          |                   | PHF21A.2          | -0.343947806227114 | PHD13.1       | -0.27315108934818   | ITSN1      | 0.36103434609092   |
|          |                   | MYC               | 0.6884826025433    | FTL3          | -0.622810486064124  | PKT7       | 0.29356704070285   |
|          |                   | CNDL1.1           | -0.48215414261025  | ENP2.1        | 0.362174812858807   | TRAF1      | -0.29505428095254  |
|          |                   | ELAVL1            | -0.5200910762196   | TOP2B         | 0.3557288099117     | CDNF48     | -0.295183523943    |
|          |                   | MIAT.2            | -0.69284732013773  | ZNF292.1      | 0.34330207788737    | CVS83      | 0.48296763081514   |
|          |                   | CRAB2             | -0.404581404873408 | APP.2         | 0.30996149065868    | SRRM1      | -0.28746028188367  |
|          |                   | MTF2A.2           | -0.5442286126135   | PCID          | 0.35813001754968    | TGSO1      | -0.2814489798      |
|          |                   | MTNDS.2           | -0.29231524897591  | MEAF6         | 0.35448389771122    | MMP2A      | -0.27304057605583  |
|          |                   | MTNDS.1           | -0.28521477292629  | BAG1          | 0.30121124461241    | EPF        | -0.30909047135074  |
|          |                   | TPN1.2            | -0.46848433107118  | RGNH          | 0.3871886651104     | ADPH1A1    | -0.286146648311    |
|          |                   | ITM1.2            | -0.52453573888807  | STRBP.1       | 0.29148807900407    | TUBB4B     | -0.28217360704677  |
|          |                   | MTNDS.2           | -0.26710025578423  | ANDR12.2      | 0.4804845453238     | ZNF17      | 0.3500562032002    |
|          |                   |                   |                    | RAE1          | 0.34607018119217    | TACR8B     | -0.2942881071079   |
|          |                   |                   |                    | UBL1.1        | 0.32038960222965    | LPP        | 0.26281107597615   |
|          |                   |                   |                    | CCF1.3        | -0.26927407488332   | TMCO1      | 0.25212055348333   |
|          |                   |                   |                    | SOX4          | 0.31417384097399    | NRX2F      | -0.2942881071079   |
|          |                   |                   |                    | ARID1B        | 0.316116789521925   | RPR2       | -0.29248340560486  |
|          |                   |                   |                    | LAMP1.3       | -0.25189804102573   | RMR2C      | -0.33149100370517  |
|          |                   |                   |                    | SOX8          | 0.313746810020508   | CHCH1B     | -0.2950278633388   |
|          |                   |                   |                    | TGSO1         | 0.303904008111624   | KIF22      | -0.2575117984401   |
|          |                   |                   |                    | CHOP1         | 0.281349096694794   | PGP        | -0.3074312520612   |
|          |                   |                   |                    | SPAG9.1       | -0.259626089050974  | MRP2       | -0.28588403888242  |
|          |                   |                   |                    | WFS1A         | 0.27956179788567    | MDM1       | -0.25888403888242  |
|          |                   |                   |                    | ATP9B.2       | 0.33363149197728    | HNNP3R     | -0.30382948476088  |
|          |                   |                   |                    | UBD1.2        | 0.34543179514919    | POK2B      | -0.30541920520202  |
|          |                   |                   |                    | HNNP3D.3      | -0.28052153338808   | RRP1B      | -0.3254447458822   |
|          |                   |                   |                    | NEAT1.3       | -0.96644900679192   | GLRP2      | -0.3569897313861   |
|          |                   |                   |                    | CEP2.2        | -0.26548129102026   | FOXP       | -0.3610278633388   |
|          |                   |                   |                    | NSF           | -0.79959144750213   | CDAP8      | -0.25552911891414  |
|          |                   |                   |                    | SPAG9.2       | 0.26930083373647    | BEX1       | 0.43350739973258   |
|          |                   |                   |                    | GAAL4.1       | 0.29101878996013    | INAF1P1    | -0.2584031381049   |
|          |                   |                   |                    | CCDC8B.2      | -0.4441139717822945 | MDM2       | -0.3008996229449   |
|          |                   |                   |                    | ATP7F         | -0.290242339952334  | THOC7      | -0.26071166283565  |
|          |                   |                   |                    | PCID          | 0.27007248895848    | REH1       | -0.28978135648289  |
|          |                   |                   |                    | OSRPL2.2      | 0.31303339761558    | MYR1.1     | 0.40266189714437   |
|          |                   |                   |                    | NGRN.1        | 0.31342946951167    | ELDC       | 0.37301961688516   |
|          |                   |                   |                    | CND13         | 0.27160401334107    | CALM4      | 0.357421568793002  |
|          |                   |                   |                    | ITSL1         | -0.3484024799884    | PFND2.1    | 0.357421568793011  |
|          |                   |                   |                    | NTS3B         | 0.30031310159007    | ATP5C1.3   | 0.27250241393368   |
|          |                   |                   |                    | TTG1          | 0.28248984138148    | CFB2       | 0.280881631891918  |
|          |                   |                   |                    | XPR1.1        | 0.345489487928084   | SC12A13.3  | -0.480984827104697 |
|          |                   |                   |                    | USP22         | 0.312161871693808   | MDO2.1     | 0.30248660321069   |
|          |                   |                   |                    | CTD1.2        | 0.27005784400153    | SHNG2.4    | 0.32757863480514   |
|          |                   |                   |                    | DRAXN.2       | 0.28657948254197    | LGMN.2     | -0.267491786989429 |
|          |                   |                   |                    | BAG6          | 0.29170017175404    | PHD3A.2    | 0.5418216158793    |
|          |                   |                   |                    | SOX4          | -0.388173849160971  | SC12A13.2  | -0.33564480884422  |
|          |                   |                   |                    | MTX4          | -0.31525744114618   | AGO1.2     | -0.30796519997412  |
|          |                   |                   |                    | MEG3.3        | 0.304053802434269   | SLC25A6.1  | -0.38478074617499  |
|          |                   |                   |                    | STY2          | 0.2548078831377     | EC1.1      | -0.38825671813073  |
|          |                   |                   |                    | ATAD1         | 0.25448289190236    | TUBB4.6    | -0.383789189940478 |
|          |                   |                   |                    | CTSD.4        | -0.2817848981457    | CCAP2.2    | -0.381588619966217 |
|          |                   |                   |                    | CLT1.1        | -0.3173712469712863 | BECL1.2    | -0.38891500678609  |
|          |                   |                   |                    | VGF.2         | 0.27036391268182    | EMGE       | 0.4489195807294    |
|          |                   |                   |                    | TNFR1D        | -0.30042801755685   | CLCA2      | -0.2811066428222   |
|          |                   |                   |                    | AFON          | 0.26701816959888    | CLCA2      | -0.2811066428222   |
|          |                   |                   |                    | USK1          | 0.25340021608248    | SRP2.5     | 0.53341257905754   |
|          |                   |                   |                    | AKR1B1        | -0.377444129642216  | TRIM13.3   | 0.3155923742216    |
|          |                   |                   |                    | ACOT7.2       | 0.289211551939664   | MKR2.3     | -0.29633023703141  |
|          |                   |                   |                    | AKAP3.1       | 0.35108868128143    | AFD1       | 0.302514609512605  |
|          |                   |                   |                    | APB1          | 0.290091403191516   | MKR1A.5    | 0.38467401397785   |
|          |                   |                   |                    | HMSGR2        | 0.368978483975977   | FPH14A.4S1 | 0.44949204584783   |
|          |                   |                   |                    | SRF3.7        | -0.25932474204683   | ZNF428.2   | 0.28166064491783   |
|          |                   |                   |                    | NIPNAP1.1     | 0.26194464042706    | SOX4       | -0.40529123529239  |
|          |                   |                   |                    | CAS9          | 0.25440301760189    | PCID       | 0.35846657881206   |
|          |                   |                   |                    | BSCL1.1       | 0.3830618938707     | PODM1.1    | 0.31228107565689   |
|          |                   |                   |                    | SC18A1.1      | 0.29071180424257    | TMEM132A.2 | -0.30313094034876  |
|          |                   |                   |                    | ARID1A.1      | 0.3411788176158     | CCF1.3     | 0.36409707066137   |
|          |                   |                   |                    | AKAP2.4       | -0.64281348641951   | TPR.2      | 0.35292526711149   |
|          |                   |                   |                    |               |                     |            |                    |

PKMFP.1 -0.28233928666892 PBK3 -0.259645409101943  
GPI -0.281932461625211 DD11 -0.25604228623506  
SMP19 0.26112574209802 GLRX3 -0.262815151040809  
STRB.2 -0.265778614168161 NDUFB8 -0.25247050280408  
SMARCA5.3 -0.308295681285502 TXNL4A -0.25192524524657  
MHSJ.2 -0.28579640474925 TWIST8 -0.25837988970207  
RFSCL.4 -0.2591768826283 IMPC2 -0.25866447299821  
ISOC2.2 -0.277941694672174 YF1A -0.251004120019691  
MAMM1.2 -0.2605772007311 YWHAG -0.251013513293589  
CCM4.4 -0.25427504186603 ALDH9A1 -0.2621731786653  
PBX3.2 -0.26464560884914 SESN3 -0.2578520512671016  
PRAT3 -0.27825651699142 DHX9 -0.25926511971281  
MPP1.2 -0.25767340660102 KEF1A -0.254655268505728  
BEX3.1 -0.27376544459075 ABCE1 -0.26157846369618  
NFC1.2 -0.318940749005106 PRKCI -0.25294464665855  
NFC1.4 -0.2881875990528 PRK25 -0.25289112395174  
SNRPB.5 -0.380893438851102 MT-ND4 -0.48028967521953  
FN1.5 -0.831572289957772 RHOB -0.339313647512197  
SFBSCR1.1 -0.26502650143223 DNAC2 -0.262570430955054  
KDM1A.3 -0.328621579092244 FANP11 -0.278850777310764  
DCP2.2 -0.265782868785049 CALM3 -0.27062357178908  
DCAF21.2 -0.2383113134064 SLC41 -0.25405500032348  
BTG1 -0.55764254066145 SNHG3 -0.2879839485761  
HADH2 -0.25087695727999 KIF5C -0.252884919928838  
MAGEF1 -0.2651278011141 ACT12 -1.09934089728901  
ID3.1 -0.53713175054249 THUMPD3-AS1 -0.26731125995151  
MAE1.3 -0.311506113836695 KPNB1 -0.26655316373308  
MPSFA2.2 -0.4722087564491 TMS6A4 -0.868150163103794  
CXCR4 -0.380186027747038 TUBB2B -0.42180778128523  
H2AFY2.2 -0.28623851878641 ERF3A -0.288232930279052  
CFE1 -0.7080840868051 DUSP6 -0.25512477379289  
GAWB -0.26953460501373 PCOLCE -0.25401694288912  
KCNMA1.1 -0.38494598052988 MRPS26 -0.25404966147034  
DOK4.1 -0.30433874923115 BAZ1B -0.25819206399907  
TMED9.4 -0.2910064622291 CFI -0.49929484291894  
MEST.3 -0.323234191879962 CSTF3 -0.254007567971756  
AHNAK2.1 -0.80191896496272 MAFK1 -0.302566448112159  
RRE1 -0.416405281324098 CAOM1 -0.271126585921478  
HNRNP11.3 -0.31565091924622 SLC2A3 -0.304280903700983  
CTCF.2 -0.2877431430823 HSPAB -0.337813818161029  
SUFPI10.2 -0.34669117832095 PDI -0.258087212849392  
ARL8B -0.347900240468038 FN1 -0.59150875298088  
UQC9B.3 -0.2774866212122 CCND1 -0.654022848767304  
TCF1.4 -0.297186632951398 RGS5 -0.32123858921329  
EEF2 -0.415184465503209 RAB16 -0.288223990535366  
YAF3.3 -0.374522186711165 GPC2 -0.26607473844088  
SNAI1 -0.333608540102523 CEB1 -0.31842147059799  
PDP1.3 -0.40541717698402 GSTO1 -0.284538281884626  
MED13 -0.38493344261652 NEON -0.280700520678689  
CCL1.3 -0.336314579448005 SLC3 -0.40690072175944  
IARS.1 -0.259338112682337 DAAM1 -0.270286867695185  
TRMT10C.1 -0.469558514557233 MEK3A -0.2620073044858  
PFWD.1 -0.264120806571229 TSC2D1 -0.45412330939992  
ZNF791 -0.327665658719932 HDGF -0.288297289272407  
ED1.1 -0.2610397356023 CNTNAP2 -0.750887914755685  
MDM2 -0.488282897090944 CCNE2 -0.288455236262027  
TMM4B -0.271326197467802 FADS1 -0.33086730078669  
STMM3.1 -0.257558843267848 IPO7 -0.288828544747006  
TMEM147 -0.25975104672916 SPPT2 -0.25428769414351  
C1orf1 -0.25717638261021 PCOLCE -0.28102091899388  
ETFR1.1 -0.3409990822159 TUBA1C -0.29302656364844  
PRK8 -0.15907413404011 BIC -0.36140327510602  
SRF7.4 -0.28100902423837 TCAF1 -0.25806108447703  
RPP21 -0.355619872279003 ID4 -0.25205305890064  
PAGM1.2 -0.27824998478571 PROM6 -0.266718283055676  
LRK9C -0.481615136465476 PUPK3 -0.264009200201289  
DCTN1.1 -0.294939817654745 AKAP12 -0.31138046881622  
LRN1.2 -0.26560754018088 KLC1 -0.33931244007425  
SNRPB.3 -0.31591754607616 TPST2 -0.5997129725698  
CRELD2.1 -0.268512145624214 UGP2 -0.30954515880783  
MUPP2.1 -0.44399794849005 SYT1 -0.4385002497218  
MEX1.4 -0.306486581330453 MT-CD2 -0.420873019745154  
GGCT.2 -0.328379050320987 MLL11 -0.55754610834107  
PURA -0.31276229092322 MTK1 -0.4831061059792467  
CTNNA1.1 -0.3756180582831848 INAH -0.591471410334582  
ANK2.4 -0.405210286628288 MT-ND6 -0.402283218622384  
EXOSC3 -0.25808812402208 PIGC2 -0.50411917325699  
EFL3 -0.353800217010338 WTAP -0.26405605225264  
TUBA4.4 -0.488217029223704 MYC -1.18895912993354  
FEN1.3 -0.30028208373119 MT-ND5 -0.513971240330899  
FAM14.5 -0.201648046432028 MAP1B -0.365408619002384  
ALB2171.2 -0.31588802379964 BASP1 -0.309652227466832  
LYPD1.5 -0.3870742099341 MT-CYB -0.296862423625095  
GART.3 -0.257327498617271  
APLF1.3 -0.29763235481146  
LYBE -0.297563235481146  
MAPKAP5-AS1 -0.39745340551286  
SLC16A1.4 -0.3591448177154  
TAF1D.1 -0.356219781148127  
C6orf33 -0.38874014905988  
HMGCL -0.24724149864872  
UQC9F51 -0.338364848483714  
RETFEG2 -0.2722404993303  
RSRP1 -0.38058489338024  
MPL1P -0.381709662808764  
ZFX -0.28323741384954  
MTCF2.2 -0.38803751901788  
PCML2 -0.298427391577946  
JOSD1 -0.38082850156497  
ELAVL1.1 -0.25158809813142  
MRPS33 -0.323261323944936  
RBPPL.4 -0.265675978670436  
TPS12.2 -0.33732308691944  
NDUFB3 -0.29665168768824  
POLM2.5 -0.3491332702093  
HSP4 -0.349730270267778  
NAP14 -0.271265435964221  
RUVBL1.4 -0.29756282293144  
POP -0.255016840626517  
RWD1 -0.31044848082817  
HMGC5.2 -0.36411620054738  
PMS2.1 -0.30962493931124  
TRIM2-AS1 -0.28996506577453  
TRAPPC4 -0.367997194700657  
CALD1.5 -0.48168972467138  
CDC8B.3 -0.30115708778817  
STK19 -0.26896303124539  
RAD29A -0.384404190474857  
MRPL52 -0.2684444521808  
TRAP1.3 -0.38152723996507  
CBR1.3 -0.251223931615404  
SERP1.2 -0.25776885464648  
CDX7B.4 -0.25327025364832  
APP.2 -0.34118842170496  
SAPF1.2 -0.32215970175793  
BXSR004.2.3 -0.279950432954767  
FBL.4 -0.33981752146728  
MKNL1.1 -0.31161381800621  
NDUFB2.1 -0.254786208697426  
CHD2 -0.388570495600867  
RABA -0.251251161103036  
ANP3E.3 -0.384231154062244  
MAGEH1 -0.281548837507695  
ATP6A11E1.1 -0.3467408083025151  
NDCC2 -0.286042590020288  
CL20F7.3 -0.25035500151875  
TUBA1C.3 -0.346451010991601  
ATP5F1B.3 -0.277091278451162  
NDR1 -0.2625554180786  
PFF1A.3 -0.301618316618202  
SCBS2.6 -0.317718355638454  
MRPL57.2 -0.274111202527432  
RHRC3 -0.50089618260611  
BD.2 -0.34113112712009  
TSC2D1.4 -0.283883299237384  
JUND.2 -0.361190408360051  
SEV1.1 -0.2760099563625  
ASCC3.1 -0.2539746333733  
MECP2 -0.32405795354725  
FRK1.3 -0.44797382718636  
SERPINE1.2 -0.370790433740482  
PMSB1 -0.28371062446515  
MKNK1D1 -0.2513862688517  
LDHA.3 -0.490741988121161  
GRI3 -0.28725135367309  
TAF13 -0.312613851265674  
TOP2B.2 -0.28430995329949  
CSD1.2 -0.285507013418843  
TDR1.3 -0.3560235081376  
RTN3.2 -0.3222852111094  
UQC9C.2 -0.33441640153302  
MRPL5 -0.405340107121483  
CSRF24.1 -0.33618845442233  
CCDC12 -0.339951768397754  
SLMO2 -0.30709677225543  
ATP5F1A.2 -0.2466668123502  
SURF6 -0.31245874096107  
CACR1P.3 -0.38287643833578  
CTSL.2 -0.34387456600528  
ATF3.2 -0.550810347714654  
PMSA2H2C.2 -0.509678537513  
GNAO1.4 -0.30164420300863  
PURA -0.2898035215831  
SRM1.3 -0.28094821038783  
PCC1.1 -0.26388096145118  
EEF1G -0.410479042934101  
MKNK3 -0.293492609791037  
THUMPD2 -0.40786297046736



|               |                     |
|---------------|---------------------|
| FADS1.3       | -0.384315137911595  |
| LINC00632.2   | 0.3329883284977     |
| CCL16A.1      | -0.30997161040985   |
| HCAP7.3       | -0.36009492113477   |
| MPLL4.1       | 0.27514348164163    |
| FBPBL1.2      | -0.30617264897015   |
| FPYPL3.3      | 0.31382466445444    |
| CHMPS.1       | 0.263782800012776   |
| TYRPF1A.3     | 0.29318995101244    |
| CEBP1.1       | 0.26982456294475    |
| FEZ2.4        | 0.282481766206859   |
| KMTF2.2       | 0.303271395555427   |
| CCN14         | 0.3202635540117     |
| SI00A16.4     | 0.388584242904286   |
| BAK           | 0.2525796274143     |
| ENGL2         | -0.174420063186414  |
| NCEP2AS2.1    | 0.395413201306038   |
| CL60F91       | 0.354334032333967   |
| EPH2AP3       | 0.252016251232121   |
| FABP7.6       | -0.789819362236865  |
| WDR34.2       | -0.263768231865257  |
| YTI           | 0.28529186678925    |
| PDGFB.2       | 0.347242203730133   |
| COL4A2.5      | -0.411421034983552  |
| LSM6.3        | -0.259820310204641  |
| MTX1.6        | 0.44815971977173    |
| SEPH2         | 0.384290816166277   |
| NONO.2        | -0.469769929677231  |
| NAL.5         | -0.61500206144607   |
| ACO27644.3    | 0.338685951384088   |
| LINC02802.1   | 0.34997706065316    |
| CHMP2A.1      | 0.232211738991118   |
| CBX6          | 0.269828648175041   |
| ZCNR1         | 0.282613691330429   |
| TAGLN.4       | 1.4840235579623     |
| FUS.4         | -0.30545594120882   |
| MOSTF3        | 0.52345401229528    |
| RORC1.3       | 0.254434802873009   |
| PRKRIP1       | 0.310767344306994   |
| ZNF501.1      | 0.343323705706862   |
| ZNF502.3      | 0.24414485019504    |
| LAMTOR3       | 0.28924655134788    |
| GADD45B.1     | 0.410340867529611   |
| EPF           | 0.38545476483817    |
| UACA.2        | -0.343798877187732  |
| BVR6.3        | 0.40225769828195    |
| ADRN1.1       | 0.254490606511636   |
| AMF1          | 0.34176133525902    |
| ADP94.2       | 0.2942843613911442  |
| DNR3.3        | -0.32752039937465   |
| RNF187        | 0.361988496052424   |
| CSNK1A1.1     | 0.256579904219877   |
| NDUAF8        | 0.300857437070599   |
| COL           | 0.372429253783591   |
| BUD23.2       | 0.343227212343447   |
| IRX1.5        | 0.34728244472235    |
| NCL.5         | -0.393984413015246  |
| CLNS1A.2      | -0.2730846590326    |
| TMEM87A       | 0.370243708652      |
| ASPC4         | 0.315311738991118   |
| SVIL.4        | -0.30064005199133   |
| CL20F73       | 0.361022839198076   |
| DNAAF1.2      | 0.264450733919608   |
| Clorf35.1     | 0.298761464923625   |
| MEU1          | 0.312607840885781   |
| TRAPP3        | 0.31120144546509    |
| MPL27         | 0.28737475272501    |
| CRK           | 0.311464050892262   |
| USP4          | -0.316813277916382  |
| CREB3         | 0.288636823489135   |
| PPA1.2        | -0.176988760954043  |
| MTHFD1L       | 0.334044566316103   |
| IFI6.5        | 0.253104250714349   |
| HDC4.3        | -0.245851675046581  |
| CHD7.4        | -0.245402007702888  |
| POU3F2.4      | -0.317306514005663  |
| RAB9A.2       | 0.33342909284628    |
| CL20F75.3     | -0.2097599830887    |
| DSTN.4        | -0.252696838183347  |
| TECEA1.1      | 0.346159787065236   |
| TYSC4         | 0.271737340349747   |
| EP18.2        | 0.364218019330011   |
| ATXN7L3B.3    | 0.31511978647306    |
| UHRF1         | 0.33454266091061    |
| BBC1          | 0.382784111065134   |
| SMS.4         | -0.404051914418028  |
| RPL36BL1      | 0.25335080274817    |
| RABZ1A.1      | 0.26962865160216    |
| PAFAH1B3.3    | -0.335523421616866  |
| YX1BP1.3      | 0.2939524003128     |
| R             | 0.264450733919608   |
| PRRC2C.3      | -0.262963605797959  |
| CDKN2A.4      | 0.34197789724421    |
| SHAR2         | 0.33443812141123    |
| CYTOR.5       | 0.30593299473546    |
| IGL1          | -0.295407053083949  |
| MRPS2C.2      | 0.25526371902028    |
| ZNAT3.3       | 0.27299676734931    |
| KRT16.2       | -1.0406321010757    |
| LILPL1        | 0.345451355295649   |
| EPSP.3        | 0.38563252661491    |
| ZNF433-AS1    | 0.334894806566875   |
| NAZAP.1       | 0.285548071666909   |
| OTUD6B-AS1    | 0.333411280765837   |
| DCN1D2.4      | 0.46820762487483    |
| ZNAT2         | 0.2698800129015     |
| IGFBP5.2      | 0.6334892385356     |
| SNRPB.2       | 0.2957044452929     |
| MPP1A9        | 0.27314502044834541 |
| GADD45A.4     | 0.69880498724609    |
| RAB30-DT      | 0.29087297082157    |
| NRXN2         | 0.315982297700137   |
| CAMK2N1.6     | 0.370963645245288   |
| IDA.6         | -0.434343266712333  |
| MPLR2B        | 0.277341051394634   |
| RNCS1.3       | 0.39224046332979    |
| BLOC156       | 0.306939390447495   |
| GLIM2         | 0.376095864390433   |
| STTL.5        | -0.451451424701197  |
| SESN3.3       | -0.258119169601722  |
| RIBS.1        | 0.250219232378922   |
| NT-COL4       | -0.243438813709551  |
| PSMD8         | 0.271568286676859   |
| MRP1          | 0.363112634771852   |
| FRSNC2.2      | 0.31985520526949    |
| FRDM2         | 0.27007340147401    |
| HMGSL5        | -0.39742872902565   |
| ADAP12.5      | 0.2890463800525     |
| PCF11         | 0.31978956529842    |
| AKAP8L        | 0.3047916362029     |
| MARSF1L1      | 0.3182179579113     |
| POLR1D        | 0.32964645454115    |
| SERN1C.3      | 0.259865005245168   |
| NRNPM4.5      | -0.3221291021164    |
| NRBP1         | 0.30952333099644    |
| PA2G4.4       | -0.284521814106705  |
| THUMPD3-AS1.2 | 0.31253443489551    |
| ARL4EP        | 0.31120582055494    |
| Ciof78        | 0.32820333434206    |
| ADGRG1.1      | 0.40913837635549    |
| FAM200B.2     | 0.26969265371787    |
| NME4.2        | -0.28897112527887   |
| LINC00667     | 0.25063424014826    |
| DPF2          | 0.284776477615      |
| TMEM158.6     | 0.39274673695184    |
| ZNF22         | 0.311298031489587   |
| ARFL.1        | 0.39961882138458    |
| SLU7          | 0.330931130640649   |
| ME3           | -0.52009848297639   |
| MARPK4.4      | -0.2678953366786    |
| MPL21.2       | 0.256516786431073   |
| TMEM251       | 0.2628262089697     |
| CCN1.2        | -0.3145847486181222 |
| NFB.5         | 0.270318585639019   |
| Ciof49        | 0.278342274806216   |
| RF21.5        | -0.2641813132616    |
| CIB1.3        | 0.270187852176057   |
| VPS25         | 0.26952034861341    |
| CAMG1.1       | 0.31511878551975    |
| KPNB1.3       | -0.26751255416472   |
| SELENOK       | 0.263997057251602   |
| VYF5.1        | 0.30238488774035    |
| CFL2.1        | 0.293671841674665   |
| SHHG15        | 0.50195510919749    |
| RSS1.5        | -0.30507716116164   |
| SRP1.3        | -0.307117881981229  |
| FGFBP3.5      | -0.282733517028308  |
| EAPP          | 0.326195391509421   |
| PSAC1         | 0.250629298497848   |
| KDM6B.1       | 0.265783679783309   |
| PRDC1         | 0.30119606718759    |
| TMEM178B.3    | 0.262918778138049   |
| SOX11.4       | -0.358016676565145  |
| PRAGA         | 0.28611062067587    |
| PNMA1.1       | 0.254881260753089   |
| CWC25         | 0.25601958929573    |
| CLIPOT25      | 0.302624857918738   |
| SELENOT       | 0.2906720367086     |

|             |                    |
|-------------|--------------------|
| SRSF8       | 0.374536254672026  |
| GET3        | 0.321393998604218  |
| RKRC2       | 0.32206041563409   |
| CDKN2B.2    | 0.27748420239896   |
| MIR98AHG.3  | 0.280441270727617  |
| CLQBPA      | -0.248480600608294 |
| MPLP1.4     | -0.21849156388383  |
| POCD2       | 0.263593853593029  |
| PCEN1       | -0.258880474027365 |
| MPHOSPH10.1 | 0.1327846231221098 |
| DAZAP2      | 0.2559866024752    |
| MAPP3       | -0.420101348135389 |
| URE2B.1     | 0.268887932402093  |
| PKNO        | 0.253625420188237  |
| LINC00472.4 | 0.28620876045272   |
| FLEK101     | 0.25663977177437   |
| SMN30.1     | 0.295278508884263  |
| CDCC50.5    | -0.272452548024175 |
| YF1A.2      | 0.254504329290878  |
| SREK1P1     | 0.31160509653025   |
| MSANTD3     | 0.280562304712559  |
| MSPR1       | 0.272420320848434  |
| ZCCHC10     | 0.29995069941557   |
| SNW1        | 0.295150314271405  |
| MPPS10B     | 0.320270264841431  |
| ATP2B1.4    | -0.27083466565847  |
| KIF9.1      | 0.272070938484194  |
| CHPT        | 0.31160389465722   |
| MED29       | 0.255032963818757  |
| CFAP97      | 0.277660595877467  |
| SENG        | 0.302206062922123  |
| MTLN1       | 0.315590420142011  |
| CERP8.1     | 0.326037674994679  |
| TCF7L2      | -0.254471719600144 |
| TRIP1       | 0.25420401180192   |
| KLFG2       | 0.2505322513365    |
| CLP1F0.3    | -0.28189308892052  |
| DNTHP2      | 0.2804209194437    |
| CCN2.5      | -0.57856993510531  |
| RAGD.2      | 0.26027880713223   |
| SLC8B7.3    | 0.251758012121248  |
| SFT2D1.1    | 0.250697867944147  |
| MAF.1       | 0.26764893621072   |
| USP16       | 0.2676242328549    |
| SCNM1       | 0.251231588536329  |
| NGDN        | 0.2625608704589    |
| UTP5        | 0.28884873899523   |
| MEED19      | 0.271380403209463  |
| TMEM205     | 0.27295144240588   |
| NANK1.1     | 0.2848170940927    |
| HST1H1E.2   | -0.28199372812413  |
| ZNF62       | 0.26507947309062   |
| CD163A.2    | 0.268807039339331  |
| IKSL3       | 0.349490419570692  |
| WDR5B       | 0.299833752762144  |
| SMN15       | 0.267148534958     |
| ARHGAP5.2   | 0.27227496397801   |
| PKIB        | -0.257202920940398 |
| ARMC6       | 0.2636888003704    |
| EWCE        | 0.25366217165329   |
| PITHD1      | 0.31723570583795   |
| FUNDC1.1    | 0.2624174772456    |
| FOUN4.6     | 0.254602862119293  |
| ITGAV.5     | -0.270569103893987 |
| MEFM.6      | -1.91619598732579  |
| TMEM126A    | 0.314424337181176  |
| COL11A1.6   | -0.28870865207445  |
| PPP1R2      | 0.30271064343334   |
| GARL.2      | 0.2519430212205    |
| GOLGA4.1    | 0.253728694876182  |
| CDCC9.1     | 0.346021637830148  |
| FAM12A      | 0.2650239472637    |
| TMF1        | 0.255648877392593  |
| GSPT2       | 0.3025231066803    |
| TTHY1.5     | -0.315290067382034 |
| DLL3.6      | -1.34457703806432  |
| MRRP10      | 0.275106146247058  |
| YFELL3      | 0.26310450254346   |
| MRRP38      | 0.284082261143557  |
| BAG1.1      | 0.253371881050357  |
| TFR2        | 0.26400363128949   |
| SMN10L1     | 0.29407335925123   |
| KLHL9.1     | 0.25714571886859   |
| CLGAP19     | 0.25738888515471   |
| ZNF64       | 0.25871870274294   |
| TOPORS      | 0.271160335933095  |
| PCN2.4      | -0.300126611041001 |
| MGA14B.3    | 0.254981020737993  |
| PLTP.5      | -0.252343437003049 |
| URML        | 0.2561099315165    |
| MAT1.6      | -0.25841754323653  |
| ALP1        | 0.27632962825727   |
| TVISTNB2    | 0.27574793687423   |
| SLC15A      | 0.25850454400173   |
| MAPP1A.3    | 0.31610587489747   |
| TUSC2       | 0.27058207818679   |
| SEK2        | 0.2579174749018    |
| JUNB.2      | 0.300137996722679  |
| KP99DA1.2   | -0.278813286795727 |
| SHWG2       | 0.30053702129222   |
| RBBP6.1     | 0.333817046671544  |
| LRP1        | 0.253748738707034  |
| MFAF1       | 0.273773032212057  |
| MYH9.5      | -0.282589936016925 |
| SACAC2.1    | 0.301163773083948  |
| ZFANCD2A    | 0.26388070921666   |
| KCAN1.5     | 0.369034695948152  |
| ZNF93       | 0.26394199031885   |
| CNKL1.1     | 0.2675187078755    |
| ANP32B.4    | -0.256094383518013 |
| MTNOD3      | -0.296511201021685 |
| TYCL5       | -0.36874095640444  |
| COA6.2      | 0.26159577832822   |
| CID         | 0.274590518605493  |
| HE2         | 0.497713386242     |
| ARLGP1.3    | -0.281518974112254 |
| KLCL4       | -0.259808741408491 |
| SDO10.6     | 0.37490024338384   |
| VGE.1       | 0.275463110280112  |
| SOD2.6      | 0.34527154468857   |
| HNRNPUL2    | -0.274057583644089 |
| MT-ATP6.3   | 0.25660311326494   |
| ZFP8L2.1    | 0.25124549351671   |
| MFKB4.4     | 0.3149138537977    |
| ELNA.5      | -0.3966301878711   |
| ACTN1.5     | -0.314976116132998 |
| COL4A1.5    | -0.353250101816285 |
| SHOR9L.1    | 0.27472375978486   |
| CCND1.3     | 0.300795398470892  |
| SPPL4       | -0.322196816385002 |
| MFP1.4      | 0.32380166871456   |
| IFRD1.1     | 0.267927824702757  |
| AJM6        | -0.307543202054664 |
| PHILDA2.6   | 0.4412103102351978 |
| MALAT1.4    | -2.46776431352434  |
| FTH1.7      | 1.0937784960308    |
| RPS15.2     | 0.611386173170259  |
| FTL6        | 1.11493578252415   |
| RPS12.3     | 0.70240891000324   |
| RPL2.2      | 0.70871408160336   |
| RPL28.2     | 0.624455410302177  |
| RPL41.2     | 0.632542176780037  |
| RPS24.4     | 0.60113994818679   |
| RPL30.1     | 0.623007602349991  |
| RPS18.4     | 0.6797704244754    |
| RPS26.2     | 0.60861098836235   |
| RPLP2.2     | 0.69224595136051   |
| SERF2.3     | 0.67838819913545   |
| RPL27.4     | 0.7086586734629    |
| RPLK2.2     | 0.6454340173304    |
| RPS27.2     | 0.70848451813627   |
| ATP5F1.5    | 0.80080171730919   |
| RPL1.5      | 0.64840167079712   |
| RPL37A.1    | 0.751897232429983  |
| RPLP3       | 0.67999076962943   |
| RPL1.3      | 0.59463181462108   |
| RPL17.1     | 0.625054601380411  |
| RPL0.1      | 0.53220916111636   |
| RPL21.1     | 0.62425199517208   |
| RPS4K.2     | 0.64000471945422   |
| TP13        | 0.65199429924411   |
| RPS21.1     | 0.6493020462631    |
| RPS21.2     | 0.56734790610363   |
| RPS19.1     | 0.69177883665724   |
| RPL2.2      | 0.54863365207124   |
| UBA52.3     | 0.598300347691873  |
| NME2.3      | 0.6013998844843    |
| RPL11.3     | 0.51291246146226   |
| RPS15A.3    | 0.5298829690766    |
| RPL13A.1    | 0.68978846562106   |
| RPL34.4     | 0.6006621480357    |
| RPL4.1      | 0.55598155136407   |
| RPL23A.2    | 0.64005115177667   |
| RPL6.2      | 0.59667399305214   |
| SHNG2       | 0.71216072428225   |
| HTM3.6      | 0.6227500581545    |
| FAU.1       | 0.447902395475586  |
| RPS4.2      | 0.47763880758002   |

RP55.5 0.54060407767417  
MF3B.4 -0.51680615558609  
RP2A.5 0.50905579737418  
RPLP.6 0.60406098949051  
RPL10.2 0.51356031448191  
RPL5.3 0.64593997487111  
RPS6.5 0.54574991704395  
RPL9.1 0.54788325757652  
ODT4.5 0.62167271816908  
PPOPI.4 0.60762400649505  
RPL8.4 0.46313429995519  
RPS8.2 0.43485341168373  
RPS3.4 0.59115336135014  
RPS2.5 0.79901170429345  
PFDNS.2 0.53266022976882  
TM6SD.4 0.59971676595586  
RPL26.3 0.45856747840257  
RPL3.2 0.5737344000018  
RPS9.2 0.53934412129624  
RPL2.3 0.519075843264908  
RPL7.2 0.55414898524685  
S10DA10.7 0.72012812312323  
RPS25.2 0.466604358157286  
MF3 0.52491673628985  
RPS27A.3 0.38426124590841  
SHBGR1.5 0.60555133694262  
RPS13.2 0.485538462049399  
RPL15.3 0.477065527055123  
RPL5A.2 0.422930515381653  
GAPDH.4 0.536086366127203  
RPL36A.4 0.53211792707282  
PTM1.5 0.59411317168884  
MT-CO3.4 -0.664592329538841  
RPS12.2 0.448721021739542  
RPS20.2 0.49777040248927  
CHCHD2.7 0.459422517244351  
RPSA.5 0.544097020262627  
EFNA5.4 -0.448060481319721  
RPS16.3 0.471893257970216  
GOLJ.3 0.57385112130384  
UQCX1.5 0.477339791936  
CNTRF.5 -0.435983622645655  
LN28F.4 -0.462132126778634  
NACA.1 0.420456765988826  
SGBP.3 -0.39082951797856  
BRB8 -0.37611706566671  
CLT6F75.1 -0.37013552116478  
RPS3.6 0.40855596253861  
TMA7.2 0.46806209227492  
SMAO1.1 -0.38693717101332  
RPL10A.5 0.52163896658363  
UQCX11.3 0.483643107447953  
RPL11 0.50020224648803  
ELOB 0.472511473925588  
ZC2H1A.2 -0.42439391587632  
METHF.3 0.570591084964542  
TBM17.3 -0.453748572957997  
RPL24.3 0.35625106982783  
YMGX4.5 0.719465109336564  
SET.1 -0.49462496438619  
RAB8B.1 -0.35922963900619  
ZNF32.1 -0.3959326309022  
ARL6IP1.1 -0.34448619137023  
GULP1.1 -0.327758423683584  
MARCKS.3 -0.447083898551316  
TBAO1.1 0.34448619137023  
EF1AY.6 -0.45399774770987  
C1orf152 -0.378579368393941  
T1A1 -0.35213968001243  
ODF2L.2 -0.347887762999563  
PAA1.2 -0.38117477960938  
RPL2.1 -0.332848031518476  
PCSK1N.6 0.38191416177322  
JAKM1.1 -0.36095962217266  
SEZ6L.5 -0.3947708121139  
UNCSO.1 -0.339743349643274  
FUT8.1 -0.351517212637501  
CECR4.4 -0.3821218267744  
SHOC2.1 -0.351787524575798  
SPPL2.2 -0.33278891010352  
CEBP6 -0.35020670421347  
GLTSD1.1 -0.338783971778449  
SYNRG -0.373043115702108  
EBLNRP -0.3189684802147  
CAP1.1 -0.319716451482163  
STX2.2 -0.36940120502834  
EF3A.1 0.41832596486883  
EBAG1 -0.3139595284051  
ZNF518A -0.368680289304838  
Ccor15 -0.3294207584786  
RPL36.1 0.437704413501774  
ATOX1.3 0.499588718867916  
CALM2.5 -0.493311330897129  
RPL4.1 -0.31709165666096  
EEF1AKM7.1 -0.278801149851711  
RPL7.5 0.431360861911243  
TMEM401.1 -0.318867511411515  
RPL7.3 0.417302811648036  
RBM7.1 -0.308821750997236  
RBM12 -0.310117664647998  
NGDN.1 -0.33212082513452  
UBR2O2.2 -0.303492958650022  
NRCC5.5 -0.384211961719404  
C12orf65.1 -0.349925717665563  
NUCK16 -0.4652082818783996  
VINK1 -0.346833923860824  
LIFS2.1 -0.279154791488009  
NR6A1.5 -0.449362367013335  
MTAL1 -0.249658021627399  
PCMTD1.1 -0.325186484989329  
VPS48 -0.35096404924431  
GNAI1.2 -0.313319749995854  
TMEM170A.1 -0.344542275293977  
SRP14.3 0.375707395383748  
VIMS.5 0.412463694949178  
CTM1.2 0.3166668931009  
BET1.1 -0.293679009109002  
Y1BB.5 -0.411330662964197  
FLNDC1.1 -0.3299737296346  
IGFBP7.5 0.36968855943287  
RBCD1.1 -0.39697101346083  
RPL12.2 0.365365861101243  
POCL1 -0.295408750442788  
JPL1.4 -0.356464546165479  
UR4G -0.31664964905978  
IF7A.1 -0.275022307523554  
PFP4F.2 -0.316339179952203  
CLT6F5B.1 -0.338490216464666  
MFA2.4 -0.33819290849094  
SC2A3.3 -0.42328100289807  
EMER1.3 -0.32968001118565  
KC1 -0.339065706499571  
IF7F -0.317926771151619  
CDC174 -0.3093121741421  
MTRNR2L11.5 0.65660557804733  
MTLN2 -0.29289988302053  
GPIA.2 0.426790331228143  
ING2.1 -0.315337990329646  
PFPN2.1 -0.32604947400456  
PFPN2.1 -0.32604947400456  
PFPN2.1 -0.32604947400456  
TXNDC15.1 -0.30934402268552  
CHMP2B -0.304717271609188  
UBN2A -0.32260221060035  
FTRBBP.2 -0.3097197296346  
MTRRS1.1 -0.292321751635308  
MER1 -0.34421807174981  
EIF1OT.1 -0.35911291253184  
ARGAP3.2 -0.297284001966712  
SRPK1 -0.2852087246414  
RDC1.3 -0.36596471206082  
GOL11B.2 -0.29193002762835  
FRKW1 -0.31099449256381  
SCN1 -0.36369341519701  
CIFD2.2 -0.401575704603387  
R71 -0.29262332151535  
RPS24.4 0.31411963401752  
RPS24.4 -0.279140802004093  
RBS1.1 -0.35011494664237  
CLDN10.1 -0.3121709495742  
FOXN3 -0.34871398513729  
MENE.4 0.38231787401247  
NBT1 -0.372016723356653  
STAM1 -0.285372751043406  
ACTR6.1 -0.292004424234805  
CUL2 -0.32931776789543  
CShf16.4 0.473888230639579  
GTF2A1 -0.30506207882081  
RUP4 -0.324467474450999  
CIE3 -0.3116319790492  
GSP12.1 -0.34835202457611  
SMAD4 -0.31792824748318  
FAM104A -0.371552948848483  
PITPNA-AS1.1 -0.313986236068448  
YAP2.1 -0.29932982159898  
SCCL6 -0.44705353879898  
UBR2O1.2 -0.32958481314127  
RUFY2 -0.288607970191642  
PRLA.5 -0.4226049449012

NRBF2 -0.34724693258538  
ZCCHC7.1 -0.283072714952316  
FADP7 -0.261494907918015  
HSD17B4.1 -0.26034980779037  
HST1H1E.3 -0.495859240523497  
MABR3.1 -0.120803104678415  
RACK2.2 -0.402161766879701  
MICUL1.1 -0.262453825204904  
BAG5 -0.357379159833587  
THYSP1.2 -0.353018061386111  
YBK1.3 -0.427888004659256  
MRC3.3 -0.30897100057603  
THYSP2 -0.35351061298437  
GOLGA2 -0.3152484729864  
CCSER2.1 -0.32998684844681  
CNOT4 -0.307126520884228  
WASL -0.330163134072539  
OBI1 -0.316138756025595  
URL2.2 -0.34867538732547  
PSPH1 -0.271161640817013  
SNV.1 -0.313293289391749  
RAB21.5 -0.354446818071387  
NSMCE3.1 -0.318145393525558  
GTF2B -0.30500676388175  
CSNK1E3 -0.31632085104646  
MNAT1 -0.302515705807366  
KIF18P -0.304110989484887  
EPN2 -0.329949957081961  
SNGL1 -0.316368108778711  
KLHDC2 -0.31147571052633  
KIN -0.28664727004894  
YBX1 -0.25503229416126  
CWC22 -0.271306236396508  
TMED7 -0.287370591010142  
TNKS2 -0.30854974398366  
PHF5A.1 -0.27299531851945  
FAM126A.1 -0.3186303717167109  
WDR33 -0.318862370266089  
RNF214 -0.269158068369225  
SPN1 -0.31802504929396  
MUT2B.2 -0.45790143616124  
SUO53 -0.326411091599586  
CHDC -0.309079175389403  
RICK2 -0.309669582182182  
RPL15.4 -0.360257468916897  
NAP1.1 -0.32927889117897  
STBD7 -0.316970477310126  
HST1H1C.3 -0.422466725871124  
ACBD5.2 -0.276617898479569  
DCNS3 -0.335737629119621  
MAPKAPK5.AS1.1 -0.282397978088411  
DOCK7 -0.3230240245468  
STX8.1 -0.256648160718805  
ACAF2 -0.324609011445754  
CTTNBP2ML1 -0.33705164596315  
ZNF720 -0.388888912377911  
KDSR -0.3088236086687  
BCL10.1 -0.25384869221806  
DNAI15.6 -0.375184824624543  
GSTL1 -0.324073248161021  
PTBP3.1 -0.35762927804151  
ADAM10 -0.293089062021046  
YEAT4 -0.315310457389866  
RPL7A.2 -0.352022299509341  
SCAMP2.1 -0.286409513534  
SANO1 -0.313670544026143  
FTS2.1 -0.31762417984157  
DRA3 -0.314060701245862  
MTE1 -0.3054244202977  
MAML2.3 -0.375569377016253  
RPL14.4 -0.424940631284474  
RICK2.5 -0.304409823147950  
TMEM30A -0.29222681257386  
SC2C1A2.1 -0.3148890895568  
USP1 -0.303717727932126  
COMMD6.4 -0.410086244837162  
DNAH14 -0.326125133828679  
TMPL1.6 -0.355884292121594  
MRAP1L1.1 -0.275705215155261  
PITPNB -0.332102133138036  
PBP1 -0.29922410916572  
USP3 -0.315459350579193  
KLF3.1 -0.291402294021214  
TSPAN1E2 -0.34848672334206  
FNAL1.2 -0.2946330881431  
MARCKSL1.6 -0.397082316297158  
MTE4.4 -0.303245882096  
RPL5.4 -0.318276774349252  
C1GALT1.1 -0.288605948146334  
VPS36 -0.313004963020714  
SPTLC1 -0.344304985708766  
ZCCHC9 -0.27301484347814  
PTGES4 -0.329971124405061  
MED1.2 -0.4004044400498  
MYO1B -0.34759964871419  
ANKK2.5 -0.3655346774594  
TRIC17.1 -0.318276774349252  
SRF3.4 -0.452492181568045  
WASF2.2 -0.342649501166188  
BAG15 -0.32840321511478  
WDR41.1 -0.275821992697635  
KOA1143 -0.274713438790294  
SEPN2.1 -0.24319857512296  
ARMT1.1 -0.2806444972386  
URB22 -0.27039862759966  
ATMIN -0.33314442119758  
VIRMA -0.29688731093178  
CDYL -0.29698784895096  
ATG5 -0.2596693380703  
SP3 -0.2815923235338  
SECSBP2 -0.29222327649869  
TMEM108B -0.37187843473242  
HMGN4 -0.304150759223666  
LRIF1 -0.281425076521975  
TOR1A -0.302770942521741  
SL1B2.2 -0.30044624063105  
RBM22 -0.330304917702057  
METTL3A -0.27897691264664  
CIC40 -0.36363929796959  
MARCH7 -0.321714937382631  
NUPA2 -0.28311244285109  
LAMTOR3.1 -0.31547482946501  
FRG1 -0.311738618415587  
TP53RK -0.27034938939219  
GCPK -0.340270280281658  
ANKK1 -0.287794616661903  
BLM1.1 -0.29789652509744  
GREB1 -0.354627750562374  
DCUN1D1 -0.25624421094602  
SNM12 -0.29990902836932  
ZNFWD11 -0.271999667746166  
DSE1 -0.30473407331284  
STTM2.7 -1.7149848830341  
EED -0.3005579252123  
RSBN1L -0.355919785144015  
KATNB1 -0.3125030134477  
DNAH2 -0.32629677202802  
ACVR2B.3 -0.3160236293025  
BCL7A.2 -0.334815090131421  
YAP1.2 -0.3163784750818477  
C16orf87 -0.309384371097935  
PRPSAP1 -0.28203025449381  
ZNF3.3 -0.3099417736211  
C13orf75.4 -0.4078178197948  
TLK2 -0.302145092918322  
NUR1 -0.279972340202914  
ADGR1 -0.2886871851221  
TMEM87A.1 -0.282135080370217  
LRRFP2 -0.3215804748804  
PARD3 -0.33447950110179  
CDL1 -0.28317961555158  
SPL1.3 -0.254361390354768  
WAC.AS1 -0.32304848516661  
SLC25A13.4 -0.32561097572318  
STRN3 -0.279001008146446  
CTSKO.1 -0.3107896796113  
CBL -0.27571101761658  
CBN -0.28012742045726  
HRAK223 -0.31809467196109  
ZNF431 -0.302412826318934  
PAGL1.5 -0.39646796797215  
SUCLA2 -0.39753095433464  
SMARCA1.1 -0.318239471251896  
ARMC1 -0.3259494389542  
ADAM17.1 -0.2955198428737  
SNHG6.1 -0.49530506250467  
TALP4 -0.30922777360504  
PWWP3A -0.31202047734463  
ARGGF1 -0.310960495649396  
DTWD1 -0.30888474206242  
PRAT4 -0.35684473982243  
MT.CO2.5 -0.38661379021382  
H3F3A.6 -0.281989767428643  
SLANF.1 -0.29917483914505  
SPECC1 -0.2846346240271  
CASP6.1 -0.278097921784557  
LINC00665.2 -0.29780848814002  
PRKRA -0.28364291129362

|                 |                    |
|-----------------|--------------------|
| BNP2            | -0.288279100357565 |
| TSPI4.2         | -0.34252513529322  |
| PPF10           | -0.1286234420803   |
| TF1             | -0.3115297120637   |
| EXOSC3.3        | -0.25856258941397  |
| SR18            | -0.2405556619796   |
| FOSSB           | -0.312736557325091 |
| EMC2            | -0.255152453491255 |
| ZMYM2           | -0.3093849189492   |
| ZC3H7A          | -0.28514771248882  |
| BCAP29.1        | -0.27152120083443  |
| KMT             | -0.24803904873686  |
| RECQL1          | -0.31122254233192  |
| CERT1           | -0.30678694176528  |
| RMDN1           | -0.278818330067009 |
| GDAP1.1         | -0.308164632652049 |
| NEPRO           | -0.263863360864275 |
| DR1             | -0.304974949991571 |
| MARS            | -0.294354305361021 |
| UNG.3           | -0.319830571845622 |
| UBA6            | -0.28622014243952  |
| CNOT2           | -0.29183131028569  |
| SOCS4.1         | -0.314515901461716 |
| EHMT1           | -0.319039185368419 |
| KLF.3           | -0.33944021264607  |
| CDC47L5         | -0.27645050664864  |
| RPS7.3          | -0.31203654133027  |
| KEL             | -0.32992804028999  |
| MEDL3           | -0.31285975942025  |
| SH3BP4.4        | -0.3126032571053   |
| SH3BP1.5        | -0.31450337938661  |
| TRAA            | -0.2912845857536   |
| RBM33           | -0.272398844806507 |
| RAD50           | -0.319592614134089 |
| MPL1L1          | -0.31892941348442  |
| PPP1R14B        | -0.454311844574605 |
| ARL8L1          | -0.309407451262936 |
| COTOP           | -0.307861460480505 |
| TOPORS.1        | -0.309114383097225 |
| MUPP1           | -0.34463031026844  |
| SHRNH           | -0.322477243836909 |
| SGO2.2          | -0.414982616162272 |
| ACS4            | -0.278071819710635 |
| MMP31           | -0.27883894545632  |
| XIAP            | -0.288152022143365 |
| MT-ATP6.4       | -0.471562295067891 |
| FAM88B          | -0.3200212395251   |
| REEP3.2         | -0.26135875459167  |
| CUJAP1          | -0.255667912137556 |
| ZNF738.1        | -0.272834511026662 |
| NSMCE4A.2       | -0.304631274474099 |
| SYMPK           | -0.261361826767634 |
| TCF12.2         | -0.357140349013028 |
| IMPAD1          | -0.258504620177777 |
| YFP6            | -0.28452807122665  |
| RAD18L.4        | -0.2920488783789   |
| PHN2            | -0.337066522193221 |
| PPPGC           | -0.25250165808694  |
| POCD6P          | -0.36640174279956  |
| SERINC3         | -0.315971865206735 |
| TGFB1.2         | -0.320050975216802 |
| HCAF2.2         | -0.583799814514562 |
| CDC73           | -0.30964115335704  |
| R3HDM1.1        | -0.276540105071665 |
| ELAVL1.5        | -0.47972674881364  |
| CMD1A.1         | -0.277241640480528 |
| SRRM2.1         | -0.336519007108136 |
| RMS1.1          | -0.302675668454189 |
| FRN4            | -0.312117013026286 |
| MBTPS1          | -0.263822010739546 |
| ORCA            | -0.291906122943778 |
| ZNF618          | -0.291588965270548 |
| PHPT1.3         | -0.39667684770583  |
| EPBA12.5        | -0.320827397516233 |
| SACK1           | -0.30593950707996  |
| NIN             | -0.27971908772397  |
| MAN2A1.1        | -0.28190931101874  |
| GAT             | -0.319425146263766 |
| UBN7            | -0.291734002986789 |
| GER1            | -0.33651371076658  |
| KIF3.3          | -0.30221246112858  |
| RPS17.6         | -0.324525721651482 |
| NUTM2A-AS1      | -0.26997324282077  |
| STRIP.3         | -0.34248471818699  |
| EXOC1           | -0.29170051238476  |
| TIC19           | -0.288868571851221 |
| ZC3H4           | -0.319472215014228 |
| POU3L1.1        | -0.46249818448391  |
| ATAD1.1         | -0.2500871936384   |
| CD1.1           | -0.34540081790419  |
| NTR.2           | -0.31296694242945  |
| ALCAM.3         | -0.34073073378851  |
| MKAP1           | -0.254940001120213 |
| ZREDS           | -0.31594533828423  |
| MED6            | -0.26294818476505  |
| RBM28.1         | -0.30245014249302  |
| ETNK1.1         | -0.312720114850135 |
| POCD4           | -0.27646728112812  |
| SBP.1           | -0.34453099977048  |
| FRLL1           | -0.3074171204219   |
| NUDT15.3        | -0.29363754681161  |
| UPL1            | -0.28253625613146  |
| RABP1           | -0.312273619050716 |
| ARF6            | -0.27533367903937  |
| UBLCP1          | -0.292001379790795 |
| MIR1.1          | -0.36218330562323  |
| BRWD1           | -0.266995089799208 |
| RF2.5           | -0.34011385100396  |
| BRPF1.2         | -0.2999348031679   |
| KLHL7           | -0.263576829340468 |
| AP3B1           | -0.2907979206852   |
| VPS36A          | -0.315358512541293 |
| DNM1L           | -0.31420085325737  |
| CDMM3.3         | -0.27180842816169  |
| LARP4           | -0.2908499060275   |
| ZNF71           | -0.345859712364658 |
| TMEM22.1        | -0.284772731283496 |
| HCAF2.2         | -0.277822323674004 |
| POCD7.1         | -0.31890292166363  |
| ZNRD1.2         | -0.25649092508036  |
| TYPC5           | -0.2753247488808   |
| TBR1.2          | -0.31194451628422  |
| PCYOX1.1        | -0.283360897403805 |
| CNCL1.2         | -0.29020357143212  |
| UTPK            | -0.3193104190264   |
| NUP58           | -0.291569493253284 |
| RNF8            | -0.269388600505948 |
| TRIM23          | -0.3076782123843   |
| KANS1.2         | -0.334239138905611 |
| MKHP1.1         | -0.301780802368523 |
| CDC4144L1-AS1.3 | -0.339617308637564 |
| GPCPD1.2        | -0.320137071364853 |
| IKAP            | -0.305920041163842 |
| MIR1.1          | -0.3451706050771   |
| NCL6            | -0.4730992902054   |
| JAGN1.1         | -0.287314500136096 |
| UREG1           | -0.28113864200923  |
| CDKRAP1.1       | -0.281825134931382 |
| SNRPD1.5        | -0.274682894949419 |
| EPBA1.4         | -0.4055828905777   |
| YFP4            | -0.28494040728414  |
| CDP54           | -0.263455599478781 |
| CLIPF25.1       | -0.3668198398951   |
| ARCA1.3         | -0.34459183809051  |
| RBM22           | -0.263378761249492 |
| CLDC4           | -0.28881644191933  |
| TRM59.1         | -0.3482986790291   |
| MKRN1           | -0.25564838401179  |
| RIP18.2         | -0.34883561236417  |
| CKK1.2          | -0.31194451628422  |
| NF1             | -0.264573382772321 |
| SRFBP1          | -0.26143464281995  |
| STX16           | -0.29179564896567  |
| EXOSC3.3        | -0.311448802398833 |
| FRXO1           | -0.2695882130927   |
| MKX6            | -0.27467812144812  |
| PTAR1           | -0.271176074225128 |
| CSL.3           | -0.253227606976481 |
| GPATCHE         | -0.2904140888075   |
| SEPTIN6.2       | -0.280012913162563 |
| CFAP20          | -0.307819993281384 |
| PAGR1.1         | -0.3025168508879   |
| IRF3BP1.2       | -0.32054548105623  |
| JAG12           | -0.3336644388752   |
| ZNF221.2        | -0.2650318796124   |
| MPP6.3          | -0.280276570805565 |
| EIF4EBP2        | -0.292836115448    |
| USP15           | -0.27148997546188  |
| LED1            | -0.256557325099499 |
| UTP18.1         | -0.263481376333683 |
| NUP50           | -0.283127661046167 |
| CMF             | -0.284662631491674 |
| ATF7IP.1        | -0.308774562088278 |
| BLOC1S4.1       | -0.26596827261037  |
| MIRP.2          | -0.17997948626139  |
| EXOSC9.4        | -0.3202106836616   |
| XPO7            | -0.25290362498896  |
| CIN3            | -0.25081981100425  |

RAB21 -0.273553157750267  
TMEM219.3 0.313554888237  
KATNAL1 -0.502210034340073  
ZNF131 0.49997200788778  
FAM58A -0.266716768202555  
DMP3.2 -0.5006661050733  
STARO7 0.37791060939747  
COL1A1.4 -0.544045292537391  
SOX4.5 -0.673097194781062  
CCK2.7 0.30211313868217  
ZC3H18 -0.310480485593636  
ELOVL6.1 -0.31988095204263  
MIND1.5 -0.3250281495114  
ROBO1.3 -0.339671046724223  
ME2.1 -0.392921649367249  
ZNF51 -0.320175246555694  
ZNFH76 -0.263934881806264  
CCNK -0.27745035857895  
GATA2.1 -0.257579164246557  
PLPBP -0.251854876134802  
VEZF1 -0.267015647637984  
VAPB -0.363939757385058  
IRE2 -0.279525663775846  
TMN2 0.34942833064551  
RPD1.2 -0.39358716334066  
HSP90AB1.5 -0.301375206773701  
CCDC28.1 -0.274055311508806  
MTX1.7 -0.513789789291096  
ERR4 -0.2575670943869  
AGO3 -0.261562643610808  
NOL1.1 -0.322230980731401  
BRAD1.4 -0.30781310883006  
MBD4 -0.26295642788781  
SNX4 -0.27753045798611  
TMEM203 -0.32147145711003  
PHK8.1 -0.27049963885117  
HNRNP3A.6 -0.37261522943457  
TRAK2 -0.2790244825229  
TACC1.3 -0.287298712986746  
HERC2 -0.303079961048907  
TUNA -0.36989793073864  
MRPS22 -0.26215375146546  
MAT3A.1 -0.32524467406121  
CHKA.1 -0.3226198992622  
ERIC1 -0.294346764263787  
NUDCD1 -0.25878605927697  
RHOGL5 -0.227900701243823  
ZNF451 -0.274065689691526  
GON4L -0.299075584981407  
NEIN.4 -0.371610701312891  
HSBP1.1 -0.367134006129159  
HMG81.6 -0.430631931986276  
CADPSAP2.1 -0.2956509633359  
LSP46 -0.276382724851855  
NTSC3A.1 -0.274318824824959  
GSK3B.1 -0.301867980116055  
BRP -0.25427122104118  
GABRB3.3 -0.35971759263386  
TSPAN18.4 -0.3154605281225  
HNRNP2.2 -0.31028115360746  
PPP4R3A -0.292488524171713  
CLDC6 -0.27366264008531  
HSA1 -0.33317086388522  
GALNT7.1 -0.287817068431088  
RBM39 -0.306001344651786  
ERCC2 -0.37904804661652  
IARS2 -0.291407388322842  
DNAAF3 -0.30358070115157  
CALM4.4 -0.31886635771637  
ADNP -0.305863297926864  
TRHNP1.1 -0.2956081241215  
URQL1 -0.31705198380171  
NRAS.1 -0.261462315155844  
CNOT1 -0.26993961631094  
ZEB1.2 -0.34997020121127  
PRRC2C.4 -0.375116254951762  
RNF216 -0.28856691236854  
CPSF1.1 -0.32923324566095  
SCO1 -0.27562614487013  
CASK.1 -0.25486994692624  
SLU11 -0.3232619444226  
CKAP5.2 -0.351224961660077  
DEK.6 -0.497939622648818  
TMEM161B-AS1 -0.3899798279253  
FN1A -0.2718461821943  
OSBP1.9 -0.27097320798412  
PHK2CA -0.30107195134422  
SPDL1.1 -0.30737247336684  
SMDT1.4 -0.374501921161364  
TRHNP2.5 -0.28273096204451  
C11 -0.3120869468922  
SMIM15.1 -0.266935954411158  
SLP1H -0.25044654906079  
RPOD1.1 -0.2797887101287  
ANKHD1 -0.283928247823373  
ATPW3A.1 -0.27177186040346  
SLGRP -0.3285889312007  
SAP30.1 -0.28030099876403  
EF3A1.2 -0.39161131871266  
SLC18A2 -0.3129158878138  
HNRNPAB.5 -0.421848183600032  
SLC18A9.1 -0.28747918163134  
RRC1 -0.284454510020849  
SCSD.1 -0.322798512201222  
GOLM4.1 -0.29644776662111  
CACUL1 -0.39862345262065  
TNRC6A.1 -0.30492932174331  
COP5.4 -0.36047084886122  
TRIL1 -0.30681983838007  
SPXN1.1 -0.26297033400985  
SLTD2 -0.31369697675282  
PRDM41.1 -0.27149418511029  
RBM6 -0.312348209083901  
RFC3.3 -0.25768567712838  
RPS.2 -0.255746388771717  
URX1 -0.28076115138686  
PODXL3 -0.316488807202776  
DOPA.1 -0.307403345783064  
NUPR2.1 -0.30441961919173  
NEMA.7 -1.8441322124155  
KAT5A -0.34446050505997  
AGC1.3 -0.29463605071759  
CST5 -0.3778680381617  
TGS1.4 -0.32453977249159  
KASS.1 -0.28764721564969  
ANK2.5 -0.44366502323011  
URB21 -0.26880661597439  
STAG2 -0.30651787366284  
TRIM33 -0.279772364826982  
FAF2 -0.28924446292736  
BRD3 -0.31214662656154  
PANK3 -0.261172124520717  
PRR14.1 -0.28259086796251  
HMG8B4.1 -0.271662340151642  
SRGA1.1 -0.3283350513766  
AGO2 -0.39248470997683  
ATG16L1 -0.2525251136277  
MAP1B.5 -0.30166127908157  
PCNKA.2 -0.31282367676263  
NUDT1.1 -0.30982472301878  
PHF23 -0.26425228076834  
ZNF22 -0.28632808068814  
RBP -0.30292629626536  
RCC2.4 -0.3521491707658  
PRRC2A -0.27782225676431  
NDUPAB.2 -0.4243127781395  
HSPB1.6 -0.3788237446527  
LCOR.1 -0.333497450995498  
KLHS2 -0.3855240032257  
MT-NC3.4 -0.34206460819455  
RSRP1.2 -0.27566303051953  
TMF.1 -0.29833985228291  
EPE1.1 -0.25446119532819  
MED13L.1 -0.28663286142915  
GRP1.1.1 -0.27244748795158  
PRKDC1.1 -0.27122426708369  
BAZZA -0.25558121197484  
SERPINE1.1 -0.320474676970478  
VAMP -0.34156682810462  
SDHD.2 -0.257162616365864  
SFEN -0.2950366508304  
NCHL2.1 -0.31517070836683  
MTF2.2 -0.328150148491225  
RIF3A.2 -0.31833628727632  
PTPN1 -0.272069140119373  
PBX3 -0.28368720926389  
KIAA158 -0.2657678252862  
KCC1E1 -0.28605828314076  
HMGNS.2 -0.26549836504675  
PPP1R15A.3 -0.3180817836421  
EMK1.1 -0.3287083809597  
CLIP122.4 -0.3646719812112  
SLCA4.7 -0.3329358336236  
CTN -0.28452092452723  
ONL.1 -0.2544044630396  
SFSWAP -0.258677884063892  
PRKC2 -0.29942629630561  
FKX -0.3526171108769

|             |                     |
|-------------|---------------------|
| MEIS1.2     | -0.279019816313301  |
| GNGL5       | -0.385008730007825  |
| CCDC14.2    | -0.32938490700782   |
| UTVL1       | -0.298331486161316  |
| RNF114      | -0.252367963831815  |
| EPHA2P1.1   | -0.260426152710798  |
| EPH4        | -0.279533903115139  |
| CMAS        | -0.266886718762346  |
| SNHG1.3     | 0.34716404030779    |
| PCOL1.3     | 0.414664917421819   |
| RNF115      | -0.258881500766624  |
| CEP350.1    | -0.335703090113112  |
| NAAL1       | -0.17540260880807   |
| RBFA1       | -0.274638100042471  |
| GARD1.1     | -0.272873000995365  |
| AATF1       | -0.26157442302883   |
| SRRM1.2     | -0.268258077216769  |
| ZNF146      | -0.266788105739536  |
| CEP350      | -0.29123885479627   |
| TIAL1       | -0.295805964597394  |
| SRSP1.1     | -0.254534552823452  |
| HETP        | -0.303032951515758  |
| UGCG.1      | -0.30360117885824   |
| SHTN1       | -0.250944339865538  |
| FIBIN.4     | -0.25262678070114   |
| SMAD2       | -0.25101618677239   |
| NSD2.2      | -0.264931976865393  |
| POU3D2.2    | -0.269732851096044  |
| WDR82       | -0.30802393556451   |
| DNAJC1.2    | -0.27566325523273   |
| SLU2        | -0.289071798770701  |
| RTTM2.6     | 0.353654743931389   |
| MHRB51.4    | -0.300678119076256  |
| EIF1D.3     | 0.39852093124844    |
| HNRNP40B1.4 | 0.34511774100551    |
| STK4        | -0.252964025388909  |
| CCNA2.6     | -0.40006232938889   |
| PRDX5       | 0.35566499186296    |
| RADS1AP1.5  | -0.29849468998854   |
| PRP1.5      | -0.35354644085276   |
| RATB1B      | -0.27826505911459   |
| RFC4.5      | -0.318626972387765  |
| MMA2.2      | -0.2509885384948    |
| TTC4        | -0.36211931697623   |
| RNS1        | -0.288816173021928  |
| RTF1.1      | -0.24601903469301   |
| ASPM.4      | -0.544389084086379  |
| MICOS13.5   | 0.33847596305684    |
| ZMYM4       | -0.286749684367749  |
| RBM5.1      | -0.28553401251742   |
| HVAL2       | -0.263989351783454  |
| RPAP2       | -0.29285926333679   |
| NCBP3       | -0.27612246704597   |
| CEP78.2     | -0.278205263743677  |
| CHORDC1.1   | -0.277601270174285  |
| AHLN12      | -0.26781462396663   |
| CHD1.1      | -0.31628490920603   |
| ARL14EP.1   | -0.268026624468702  |
| ZNF698.1    | -0.275436246451017  |
| HNRNPU1.2   | -0.274471596333408  |
| FAM107B.1   | -0.30562615396192   |
| PHACTR4     | -0.280051462415581  |
| HECTD1      | -0.2586367005384    |
| DPM1        | -0.26589802703203   |
| RPAP2.1     | -0.282126737991753  |
| EPK4        | -0.314118018131323  |
| CHEK1.3     | -0.274245466848041  |
| HAUS1.1     | -0.253781375641156  |
| RNF7.2      | -0.2573108046179    |
| GIGYF2      | -0.272546549450749  |
| RTN4.4      | -0.344262648828324  |
| RHNS3       | -0.339912506314025  |
| EXOSC6      | -0.250177239244881  |
| ZNF827      | -0.267443595976916  |
| SCYL1       | -0.336814963938321  |
| ARRDC3.1    | -0.267357728101938  |
| HLPD1.2     | -0.26229018523942   |
| SCAD1       | -0.265807403081699  |
| ELAVL3.5    | -0.56829371579863   |
| VEZF        | -0.274990397631371  |
| SMC1.3      | -0.300074906361125  |
| DHX15       | -0.26353834751335   |
| ANXA5       | 0.32112696956343    |
| ILKAP4      | -0.306482829254055  |
| NOCEL.1     | -0.2672775797765    |
| ZNF286A     | -0.262087459017948  |
| CCL4L2      | -0.310080746481147  |
| ST5         | -0.24712467713396   |
| RBM27       | -0.291188703222856  |
| SEPTIN10.3  | -0.254606924708081  |
| GATE        | -0.25007943636821   |
| CFAP97.1    | -0.263052683549961  |
| ECT1.1      | -0.280986239630329  |
| CPSE1.3     | -0.261261751641672  |
| SMARCC2.1   | -0.27181153446103   |
| POD5A       | -0.244421819516307  |
| ATAD5.3     | -0.26557819298252   |
| MCM3.5      | -0.365793881186239  |
| GTSE1.3     | -0.359883224011128  |
| CLIP1.2     | -0.301268278321773  |
| HNRNPD5     | -0.389326278988352  |
| CTPS1.2     | -0.26224848157996   |
| TPL3        | -0.331308017412392  |
| CAV1.7      | -0.26291207032774   |
| RNF145      | -0.261671074912058  |
| SLK         | -0.3408185780307078 |
| CD46        | -0.250669181919002  |
| SPG7.1      | -0.29500640703513   |
| ZNF24       | -0.266519742046641  |
| AHCTF1.1    | -0.28995375973383   |
| DBP4.5      | -0.38609741854379   |
| VREL1.5     | -0.34399357808875   |
| TMX1        | -0.261459782452125  |
| JADE1.2     | -0.2616818131795118 |
| PLEKHO1     | -0.2899054704702    |
| FOG2        | -0.279193716244667  |
| HNRNPU3.3   | -0.446583112384819  |
| SEC14L1.2   | -0.297948140774749  |
| CCL4L1.3    | -0.351472902980584  |
| AURKB.5     | -0.32056477495662   |
| PRCL1.2     | -0.32788104109541   |
| SRM1        | -0.2627531187071    |
| ADD3.3      | -0.27874532523923   |
| CCDC42P1.4  | -0.273573251975485  |
| SRK1.2      | 0.319649749262523   |
| FADS2.1     | -0.260623370954217  |
| OCDL4       | -0.308265514117574  |
| NOL8        | -0.30627180096356   |
| RGS10.5     | -0.40129207260943   |
| PXBP1       | -0.25131894321675   |
| NCMA5       | -0.26694931052312   |
| NPC2.5      | -0.3202889731802    |
| CBX5.3      | -0.31958083900366   |
| RMTX1.1     | -0.30760216254798   |
| CHML        | -0.2611220563482    |
| TCDF1.6     | -0.29213031123436   |
| RNF2.2      | -0.25108488307206   |
| ZFP612.2    | -0.28058061954843   |
| YLP1        | -0.2545398231117    |
| GPA1CH2.1   | -0.2776333436561    |
| AMOT1.1     | -0.26252735805454   |
| TET1.4      | -0.339461187631943  |
| PDLIM2      | -0.2580627398574    |
| SMARCA5.4   | -0.29282667208047   |
| BXN906A.2.4 | -0.254268484592782  |
| USP4        | -0.25863760774296   |
| PIGL.2      | -0.35472902891919   |
| NCAPG.4     | -0.358104503923076  |
| NASP.5      | -0.27190496805002   |
| RHEF2       | -0.27702965313133   |
| RHOB.4      | -0.360758951510703  |
| PRK2        | -0.323104841743742  |
| APC.2       | -0.36064971817547   |
| LRN1.3      | -0.32339388616249   |
| PMR1G.5     | -0.336612201414019  |
| MARK2.2     | -0.3995871780821    |
| MYBL2.5     | -0.301101307075285  |
| MUP2.2      | -0.326119104521315  |
| TNKL.3      | -0.36978524711104   |
| KLHL23.4    | -0.33125252471805   |
| GAS2.2      | 0.4224204888073     |
| CHAF114.4   | -0.277115946230403  |
| UBL1.1      | -0.301324577126591  |
| RRS1.1      | -0.26960474885323   |
| POU3D3.1    | -0.2782100787693    |
| ZFAS1.1     | -0.320486454795296  |
| SNHG17.3    | -0.256112960332244  |
| COM1L2      | 0.31849751079455    |
| HMG2.5      | -0.350916639284333  |
| PPIRF.2     | -0.253820272883487  |
| CTSLM1.3    | 0.28774348466365    |
| ATRN1F1.5   | 0.2986731703001     |
| AMD1.1      | -0.2925422392751    |
| LINC00461.4 | -0.35183297267737   |
| CENP.5      | -0.274029402727383  |
| STAT1.4     | -0.28353020898482   |
| NAV1.3      | -0.30023522724522   |
| RNKL.5      | -0.34876112013582   |

NME4.3 0.326619828149929  
KIF20B.5 -0.407115547802102  
MISL2 -0.535998463518136  
POU2F1 0.25154880701775  
CHDB 0.293197751091425  
YWHAH.4 -0.27490716422003  
FEAL1.5 0.28558970444136  
CCL2.6 -0.638719970376635  
MOS15A.5 -0.284937674772139  
NDU1F1.2 0.17544871202003  
KIF11.3 0.286339924772708  
CYBA.6 0.465659396787839  
FASN.3 0.439912266962087  
HACD3.3 0.269273513127051  
HSPA8.3 0.310009901515534  
CANE1 0.321758566711296  
ROMD1.1 0.37434496340519  
PAK1IP2 0.356182792600155  
ATAD2.4 0.32882120556421  
MGST3.4 0.278753340438832  
PA2G4.5 0.269112227433468  
CCPF1.4 0.300808148119171  
CENPE.5 0.48123624753398  
CDMB1.2 0.295537566924286  
FENL4 0.2979725484628  
SPTCL.4 0.389701386614514  
GART.4 0.261420844605776  
MCM6.5 -0.363126810203209  
EFA3.3 0.312772423814778  
GLI3.3 0.25299901223621  
SMCHD1 0.2804476705484  
RPS10.1 0.37171573892104  
USP10 0.258628199979113  
CTCF.1 0.383420331777611  
NDUFA1.2 0.38218461351276  
SLC6A1.5 0.283856377059269  
ATP5MG.1 0.2861261361791034  
NMPY205.3 0.286495131156028  
NN2 0.271119688389403  
ZWNV.5 0.258531624649688  
MAP3B.1 0.38888686145178  
CD63.6 0.26941483899692  
NDUFA11 0.254130177921171  
ATXN2 0.355912684938668  
SLC39A6.1 0.25335777943125  
ARHGAP21.1 0.282349647374398  
CCK2B.5 0.340086601198969  
CCDC112.1 0.262192064507486  
HSPD8B.3 0.349730937255937  
TP53BP1.1 0.323465471337084  
BASP1.4 0.45434242683675  
ATP5ME3 0.300924038111367  
TGFB3 0.310313402028018  
METZA 0.31742714482299  
DKC1.4 0.26917014024682  
MGA1.7 0.3088489590939  
KSHL1.1 0.25748236070592  
RCAN1.6 0.336138922918718  
SNRP.5 0.27022602122065  
ATP5MD1 0.26861256418277  
DDX5.2 0.25116183227436  
SRGAP4 0.40027657500939  
PRTL6 0.45417668798418  
TOMM7.4 0.265544672109834  
MGI5BP1.5 0.317020376109154  
CCK2L.5 0.451517865405748  
ATF3.3 0.309956935246089  
CXCR2 0.28499014676519  
ATP5FD1 0.274351090176821  
GLRX.4 0.2670566045187  
ACLY1 0.25896755056377  
SLC25A8 0.358972003018368  
RNA.6 0.676754423103985  
SQLE.1 0.375519191600349  
SDCA3 0.325700303593162  
H2AFY2.3 0.251039003550216  
SMC3.1 0.37976164934917  
MIFNDC4 0.31187171423775  
BAZ1A.1 0.27404938253963  
SNX3.4 0.2632341226862  
SELENOV2 0.251731074057948  
CD151.4 0.31500348193738  
MYE2.1 0.274697135378676  
HNRNP.4 0.37427287228868  
DLAGP5.5 0.48627932877949  
CRBP1.7 0.50282598324209  
RPNB1.4 0.3448480826629202  
ANGU11.3 0.313921694897448  
UQCXB.4 0.2961778484197  
PMP2.6 0.40192979204444  
SUPT16H.3 0.3211741166793154  
NETO2.1 0.278308890826582  
GNAN1 0.374483551211618  
SPR12.3 0.37801661966437  
DICER1.2 0.277288670309565  
DNIL2.2 0.454387909799376  
NSD1.7 0.35006103820393  
JARID2.3 0.322412959043869  
SNHCAF.5 0.36043808342422  
USP1.3 0.39973182323014  
USURP.2 0.256271178709061  
EDH3 0.280951622638138  
NDUFA3 0.360318026242328  
FUS.5 0.290033195547151  
FOXP1 0.325419201658936  
TST1.7 0.39071945082832  
GLUL2 0.262621066661094  
TAF1D 0.3174287484224  
DRAP1.3 0.28381074610917  
ZMYND8.3 0.296336294888114  
ZIC 0.25993714141491  
LUC1B.3 0.355853812619328  
NDUFA11.1 0.280599961920466  
SNHG14.5 0.481304986498858  
LBR.4 0.312397638861151  
RNF58A.5 0.37924851791677  
ATP5MF.1 0.277566306486  
PMPF1.4 0.382745571344844  
ACAT1.5 0.37924851791677  
SLC25A2.2 0.3667190188632  
GTF2.4 0.38379807018649  
RANBP1.7 0.3683486495476  
HMG2.6 0.740755410960196  
SRP2.6 0.47466099757768  
NSD1.6 0.35500400370049  
MKR4.3 0.30787973264621  
CDK1.7 0.474476712212554  
RAB41C.4 0.253133666967037  
MKI67.3 0.530243069612594  
HMGCR.4 0.3334793734881741  
SRA.3 0.2155158251513  
POU5F1.6 0.59113832776983  
SRP2.5 0.391918014808962  
SMC1.2 0.38487984113946  
FBLN1.3 0.267418940401904  
NPM1.6 0.451189916182947  
NDUFA7 0.28230287191445  
GAP43.5 0.2916689027306  
BAZ2B.3 0.281426320438833  
MTL8B 0.30956177183336  
TM6SF1.3 0.372748352265148  
TUBB2A.5 0.3466164945185  
KCF1CRL2 0.274869495009179  
SEC63.3 0.2747836090288  
HMMR.5 0.42670242262045  
PKNOX.5 0.27468083939305  
FAF2.0.2 0.267907980215881  
PALM2-AKAP2.2 0.3476304804939  
HSTYH4C.6 1.2755310290129  
RBM3.3 0.25364816677365  
SIOB1.1 0.320516443845644  
MAP3.3 0.2735402688067  
FSTL1.4 0.32896621784122  
UACA.3 0.257514277050091  
GIBBP.2 0.26361098821269  
TUT4.1 0.21704490686375  
SRSF7.5 0.333169206082882  
TLE1 0.273992931662465  
LRI.6 0.36030781548091  
RIZ2L.3 0.252699733707287  
HSPAS.5 0.3979315568476  
HNPFP.5 0.3986233593068  
MYCBP2.2 0.292516576614248  
SPPI.5 0.2566670743745467  
CLY1.1 0.2513169389716635  
AP2M1.2 0.28654424587381  
AITS2.3 0.260821932323504  
RIMA.4 0.29263342499396  
SYNE2.3 0.332689912820407  
UBR2.6 0.461008336004365  
SPRY4 0.257633044418707  
TNXB.2 0.318460370971451  
PK3R3.3 0.34225160906557  
CTN2.3 0.265047578418653  
ARHGAP29.5 0.4052046303647  
TCERG1.2 0.254687091328207  
POU3F2.5 0.357649969793545  
ITGB.6 0.25642704746082



|              |                     |
|--------------|---------------------|
| SNHG25.2     | 0.253518827045823   |
| HNRNP.M6     | -0.26834780283141   |
| SCP2.2       | 0.256793762394791   |
| FNBP1.3      | -0.271509922964707  |
| STMM1.6      | -0.487431675582921  |
| EFBP         | 0.291284796353591   |
| TUBA3.5      | -0.41177995157851   |
| HMG3.5       | -0.259051563666307  |
| APOL7        | -0.521509180080129  |
| FNUR.2       | -0.25257701074407   |
| ARL6P1.4     | -0.374416652388899  |
| MT-ND1.4     | -0.366495507966282  |
| SLICK1.1     | 0.248518285111187   |
| TCAF1.3      | -0.270446637873356  |
| PNX.3        | -0.26293556667442   |
| SOX1.3       | -0.39165239595373   |
| ANKRD12.4    | -0.269300155677881  |
| RIF1.4       | -0.357302286689429  |
| JUST.5       | -0.39165037840386   |
| KRT18.7      | -0.71757156424365   |
| TUBB2.4      | -0.31315788523963   |
| DLL3.7       | -0.88251051423825   |
| RPA3.6       | -0.2867136966867    |
| UBE2C.6      | -0.593479617081675  |
| ANKRD11.3    | -0.30486704617736   |
| NTRK2.6      | -0.2922819594610706 |
| IGFBP1.4     | -0.36264049739983   |
| KDC3.7       | -0.472280249714605  |
| DNAH1.5      | -0.28280847905821   |
| ANP32E.4     | -0.271805947311453  |
| NGU.5        | -0.332481517313497  |
| CDK4.6       | -0.50752763117804   |
| GABPB1-AS1.2 | -0.255579544242216  |
| LN28A.3      | -0.365517887836613  |
| NRP1.5       | -0.3847463308048    |
| LMNB1.4      | -0.284211719930627  |
| NAHNA.5      | -0.31336767998745   |
| THCA.4       | -0.5081815728722    |
| HLA-B.6      | -0.50145218617868   |
| CH24.4       | -0.26998845767254   |
| DNAH14.4     | -0.378887007031618  |
| NKTR.2       | -0.266452753910117  |
| ARL1C.6      | -0.283663472631608  |
| FNID1.4      | -0.28409951166676   |
| CCNB2.5      | -0.376291758971214  |
| IG3.4        | -0.697968687841757  |
| CDK1.3       | -0.373708712437556  |
| KDMSB.3      | -0.25285788123337   |
| TMPO.3       | -0.330276571495132  |
| RHOQ2.4      | -0.35029792040332   |
| CKS1B.7      | -0.303374056580628  |
| SESN3.4      | -0.262464725717219  |
| ORCL6        | -0.379715891354608  |
| NEFL.6       | -0.813757687544352  |
| HLA-C.5      | -0.258888164454559  |
| AIFP1B.3     | -0.30280704712761   |
| RUFY3.4      | -0.273523280296765  |
| TUBB3.7      | -0.5028852915256    |
| IG2.3        | -0.3821159149418    |
| CAMK1N1.7    | -0.50428742822924   |
| CCN2.6       | -0.679590536461458  |
| KIDINS20.4   | -0.277396089309585  |
| NEL.5        | -0.37057410260581   |
| FN1.6        | -0.514240713749503  |
| HMG2.4       | -0.27772756553127   |
| DISP4.4      | -0.3056411646726    |
| WSB1.4       | -0.29517124147357   |
| DPP4.4       | -0.2889416384965    |
| KRT6         | -0.2837752523909    |
| ITGAV.6      | -0.256528727683729  |
| SOX11.5      | -0.39333488256109   |
| MYC.3        | 0.65126491273471    |
| CRABP2.5     | -0.298653128602881  |
| CCNB1.6      | -0.376674897097465  |
| TOP2A.5      | -0.511803182571116  |
| SOD2.7       | -0.403873958626007  |







**Table S3 IPA upstream analysis of treated vs. untreated in all samples**

| Upstream Regulators                          | all    | benign | BIH040 | BIH246 | BIH046 | all_progressive | BIH039 | BIH047 | BIH237-A |
|----------------------------------------------|--------|--------|--------|--------|--------|-----------------|--------|--------|----------|
| glycosaminoglycans                           | 4.768  | 4.434  | 4.543  | 5.202  | 4.856  | 6.746           | 4.868  | 5.218  |          |
| TNF                                          | 3.903  | 3.343  | 3.774  | 4.389  | 4.233  | 5.055           | 4.624  | 3.731  |          |
| IFNG                                         | 2.866  | 3.259  | 3.74   | 4.197  | 3.511  | 6.076           | 3.711  | 4.461  |          |
| tetradecanoylphorbol acetate                 | 3.574  | 2.867  | 2.309  | 3.894  | 3.004  | 3.626           | 3.842  | 3.424  |          |
| IL1B                                         | 2.306  | 3.057  | 2.884  | 3.541  | 3.913  | 4.093           | 2.286  | 3.646  |          |
| poly(I:C)-RNA                                | 2.812  | 1.757  | 2.363  | 3.807  | 3.011  | 4.731           | 3.352  | 3.302  |          |
| IL4                                          | 2.368  | 2.156  | 2.556  | 3.338  | 3.476  | 3.212           | 3.045  | 3.618  |          |
| IFNA2                                        | 1.931  | 2.638  | 2.622  | 2.907  | 3.108  | 4.747           | 2.396  | 3.262  |          |
| RELA                                         | 2.755  | 2.546  | 2.404  | 3.112  | 3.12   | 3.344           | 2.753  | 3.343  |          |
| ETVE-RUNX1                                   | -3.293 | -1.287 | -2.24  | -2.724 | -3.57  | -3.429          | -2.305 | -3.268 |          |
| progesterone                                 | 2.891  | 2.585  | 2.713  | 2.891  | 2.514  | 2.878           | 3.058  | 2.191  |          |
| IL1AT1                                       | 1.837  | 2.863  | 2.794  | 3.484  | 2.484  | 4.020           | 2.045  | 2.202  |          |
| Interferon alpha                             | 1.476  | 1.897  | 1.594  | 2.733  | 3.136  | 4.197           | 2.103  | 3.08   |          |
| fligastin                                    | -2.646 | -1.878 | -2.779 | -2.867 | -2.615 | -2.489          | -2.052 | -2.722 |          |
| IL6                                          | 2.243  | 2.418  | 2.844  | 3.423  | 2.423  | 3.108           | 2.915  | 2.855  |          |
| citric acid                                  | 1.705  | 2.217  | 2.033  | 2.479  | 2.479  | 3.085           | 3.652  | 1.977  |          |
| NFkB (complex)                               | 2.151  | 2.389  | 2.295  | 2.176  | 2.172  | 3.222           | 2.111  | 3.076  |          |
| SP1                                          | 2.087  | 2.583  | 2.589  | 2.186  | 1.937  | 2.237           | 2.084  | 2.884  |          |
| valproic acid                                | 1.137  | -0.115 | -2.101 | -3.427 | -2.944 | -2.996          | -2.9   | -2.979 |          |
| IL2F1                                        | -2.594 | -1.718 | -2.412 | -2.402 | -2.779 | -2.956          | -2.598 | -1.605 |          |
| BHLHE40                                      | 2.333  | 1.664  | 1.121  | 2.144  | 2.897  | 2.878           | 2.53   | 2.121  |          |
| IL6                                          | 2.608  | 1.131  | 1.607  | 2.935  | 2.575  | 1.977           | 3.123  | 1.95   |          |
| TLR7                                         | 1.943  | 1.949  | 1.184  | 2.375  | 2.397  | 3.241           | 1.982  | 2.742  |          |
| P2                                           | 2.274  | 2.768  | 2.401  | 2.689  | 2.827  | 2.413           | 2.656  | 1.892  |          |
| EIF4E                                        | 2.159  | 2.236  | 2.159  | 2.185  | 2.373  | 2.747           | 2.586  | 2.150  |          |
| IRF7                                         | 1      | 1.964  | 2.177  | 2.033  | 2.889  | 3.893           | 1.461  | 2.889  |          |
| N-acetyl-L-cysteine                          | -2.807 | -2.167 | -2.418 | -2.424 | -1.402 | -2.215          | -2.613 | -2.418 |          |
| camptothecin                                 | 1.633  | 2.197  | 2      | 2.265  | 1.997  | 2.829           | 2.832  | 2.829  |          |
| iga                                          | 2.236  | 2.449  | 2.236  | 2.236  | 2.962  | 2.236           | 2.828  | 1.633  |          |
| lhar                                         | 1.432  | N/A    | 1.98   | 2.76   | 1.963  | 3.393           | 2.579  | 2.2    |          |
| ILM2                                         | 1.915  | N/A    | 2.2    | 2.414  | 2.414  | 3.76            | 2.414  | 2.343  |          |
| SB203580                                     | -2.34  | -1.815 | -1.552 | -3.234 | -1.107 | -3.452          | -2.233 | -1.512 |          |
| CITE2D                                       | -1.982 | N/A    | -1.982 | -2.794 | -2.2   | -3.102          | -2.407 | -2.794 |          |
| NXK2-3                                       | -2.440 | -0.819 | N/A    | -3.568 | -3.568 | -3.517          | -2.628 | -1.177 |          |
| TP53                                         | 2.407  | 3.083  | 2.571  | 1.836  | 1.619  | 2.156           | 1.728  | 2.749  |          |
| IRF3                                         | 1.573  | N/A    | 2.136  | 2.431  | 2.748  | 3.36            | 1.925  | 2.748  |          |
| CD437                                        | -2.333 | -0.181 | -3.148 | -2.823 | -2.823 | -2.885          | -2.334 | -2.823 |          |
| sirolimus                                    | -2.321 | -2.56  | -2.057 | 0.173  | -1.896 | -3.438          | -2.404 | -1.684 |          |
| resiquimod                                   | 2.401  | N/A    | 2.401  | 2.764  | 2.126  | 2.396           | 2.16   | 1.947  |          |
| epigallocatechin gallate                     | 2.238  | -1.288 | N/A    | -2.811 | -2.811 | -2.188          | -2.517 | -2.811 |          |
| acetylcystein D                              | -2.238 | 0.469  | -2.433 | -1.912 | -2.804 | -2.433          | -1.138 | -1.636 |          |
| MYC                                          | -1.819 | -0.856 | -2.73  | -3.576 | -2.002 | -1.839          | -1.983 | -1.951 |          |
| IL5                                          | 1.899  | 1.945  | 1.573  | 2.018  | 2.27   | 3.343           | 1.198  | 1.661  |          |
| EP300                                        | 1.97   | 2.175  | 1.744  | 2.18   | 1.356  | 1.97            | 2.18   | 2.183  |          |
| SI008A                                       | 2.219  | N/A    | 1.982  | 2.433  | 2.219  | 2.219           | 2.219  | 2.219  |          |
| CASR                                         | 2.236  | 1      | 2      | 2.433  | 2.449  | 2.9             | 1.912  | 1.633  |          |
| in gamma                                     | 1.982  | N/A    | 1.982  | 2.2    | 2.2    | 2.807           | 1.982  | 1.982  |          |
| OSM                                          | 1.304  | 1.124  | 0.619  | 3.008  | 1.713  | 3.139           | 2.272  | 2.254  |          |
| RLC3H1                                       | -1.942 | N/A    | -2     | -3.331 | -2.138 | -3.606          | -1.706 | -2.138 |          |
| INB1                                         | 1.673  | N/A    | 1.603  | 2.052  | 2.052  | 3.159           | 2.16   | 2.501  |          |
| LMO2                                         | 2.238  | 0      | 1.633  | 2.236  | 2.646  | 2               | 2.449  | 1.89   |          |
| LBD1                                         | 2.236  | 0      | 1.633  | 2.236  | 2.646  | 2               | 2.449  | 1.89   |          |
| IRF1                                         | 1.906  | 0.305  | 1.562  | 2.189  | 2.359  | 3.127           | 1.921  | 2.189  |          |
| lh                                           | 1.484  | N/A    | 1.931  | 1.992  | 2.368  | 2.918           | 1.992  | 2.17   |          |
| IL27                                         | 1.981  | N/A    | N/A    | 2.789  | 2.42   | 2.947           | 2.26   | 2.427  |          |
| IL12B                                        | -1.991 | -0.333 | -0.946 | -1.872 | -1.545 | -2.813          | -1.847 | -1.874 |          |
| VDR                                          | 2.228  | 1.941  | 1.992  | 1.863  | 2.317  | 1.3             | 1.863  | 2.082  |          |
| dexamethasone                                | -1.718 | -1.411 | -1.894 | -2.242 | -2.054 | -2.188          | -1.276 | -1.952 |          |
| IN1                                          | 1.345  | 0.841  | 0.855  | 2.089  | 1.274  | 1.678           | 1.5    | 1.5    |          |
| CD40LG                                       | 1.685  | 0.097  | 0.369  | 2.727  | 2.356  | 1.995           | 2.738  | 1.443  |          |
| doxorubicin                                  | 1.406  | 2.464  | 1.673  | 1.941  | 1.839  | 1.698           | 2.224  | 1.028  |          |
| hemocytoblast                                | 1.820  | 1.985  | 0.763  | 2.984  | 2.113  | 2.174           | 1.863  | 1.820  |          |
| FOXM1                                        | 2.374  | 0.899  | 1.927  | 1.749  | 2.202  | 2.154           | 1.498  | 1.127  |          |
| PLAU                                         | 2.213  | 0.94   | 0.982  | 2.219  | 1.297  | 1.311           | 1.518  | 2.433  |          |
| IN1 beta                                     | 1.293  | 1.087  | 1.907  | 1.888  | 2.344  | 2.334           | 2.242  | 2.242  |          |
| CD28                                         | 2.213  | N/A    | 0.67   | 2.345  | 2.345  | 0.896           | 2.63   | 2.157  |          |
| TNF SF11                                     | 1.708  | 1.445  | 1.394  | 1.263  | 2.289  | 2.112           | 1.86   | 1.574  |          |
| E. coli B4 lipopolysaccharide                | 1.633  | N/A    | 1      | 2.342  | 2.449  | 2.611           | 1.48   | 1.901  |          |
| E. coli B6 lipopolysaccharide                | 1.022  | 1.709  | 1.694  | 1.987  | 2.002  | 2.002           | 1.681  | 1.304  |          |
| IL1                                          | 1.729  | 0.555  | 1.485  | 2.171  | 1.987  | 1.485           | 1.987  | 2.019  |          |
| ST192b                                       | -2.138 | 0.052  | -2.438 | -0.316 | -2.445 | -2.219          | -2.28  | -1.863 |          |
| LJN                                          | 1.188  | 1.167  | 1.315  | 1.744  | 1.457  | 1.906           | 1.18   | 1.636  |          |
| quercetin                                    | -1.982 | N/A    | -2.213 | -1.688 | -1.937 | -1.432          | -2.621 | -1.387 |          |
| SP110                                        | -1.342 | N/A    | -1.897 | -1.897 | -1.899 | -3.937          | -1.134 | -1.833 |          |
| SMARCA4                                      | 1.405  | 1.311  | 0.447  | 1.625  | 2.393  | 2.371           | 1.594  | 1.824  |          |
| CS                                           | 2.177  | N/A    | 1.444  | 1.948  | 1.315  | 2.177           | 2.387  | 1.679  |          |
| PHL                                          | 0.623  | 0.942  | 1.177  | 1.552  | 1.376  | 3.104           | 1.522  | 1.701  |          |
| CD3                                          | 1.725  | 1.109  | 0.156  | 2.111  | 1.937  | 1.939           | 1.925  | 1.865  |          |
| hydrogen peroxide                            | 1.969  | 3.17   | 1.837  | 0.647  | 1.878  | 1.408           | 1.693  | 0.279  |          |
| IFN1                                         | 0.896  | N/A    | 1      | 2.011  | 2.393  | 3.993           | 1.234  | 2.203  |          |
| ILAVL1                                       | 1.051  | 2.188  | N/A    | 1.684  | 1.684  | 2.38            | 1.708  | 1.708  |          |
| AGT                                          | 1.776  | 2.499  | 0.994  | 2.524  | 1.324  | 1.76            | 1.313  | 1.396  |          |
| CREBBP                                       | 1.982  | N/A    | N/A    | 1.219  | 1.219  | 1.982           | 1.96   | 2.19   |          |
| trovafloxacin                                | 1.889  | N/A    | 1.889  | 1.889  | 2.268  | 2.268           | 1.414  | 2.288  |          |
| NFKB1                                        | 0.862  | 2.19   | 0.862  | 1.562  | 1.562  | 1.818           | 1.221  | 1.278  |          |
| MAPP1                                        | -0.544 | -0.235 | -1.867 | -1.769 | -1.999 | -3.315          | -1.408 | -1.474 |          |
| PAK                                          | 1.342  | N/A    | 1.342  | 1.408  | 1.408  | 2.468           | 2.468  | 2.298  |          |
| CTNNB1                                       | 1.777  | 2.222  | 1.2    | 2.189  | 1.943  | 1.913           | 0.952  | 0.954  |          |
| PRKCA                                        | 1.673  | -0.459 | 1.408  | 1.406  | 1.049  | 1.406           | 1.673  | 2.234  |          |
| STAT6                                        | -1.274 | N/A    | N/A    | -2.025 | -2.992 | -2.204          | -1.816 | -2.22  |          |
| INF SF10                                     | 1.986  | 0      | 1.664  | 1.881  | 1.52   | 3.212           | 1.839  | 1.839  |          |
| PIK3R1                                       | 1.986  | N/A    | 0.882  | 2.19   | 1.342  | 2.2             | 1.96   | 1.342  |          |
| TGFB1                                        | 2.241  | 4.11   | 0.699  | 0.883  | -0.337 | 1.467           | 1.288  | 0.55   |          |
| arsenic trioxide                             | 1.404  | 1.186  | 1.862  | 1.877  | 1.811  | 1.943           | 1.943  | 1.943  |          |
| KAT2B                                        | 1.964  | N/A    | 0.91   | 1.964  | 1.964  | 1.964           | 1.964  | 1.72   |          |
| LY294002                                     | -1.429 | -3.198 | -1.221 | -0.945 | -0.533 | -1.577          | -1.429 | -1.697 |          |
| APR                                          | 0.441  | 0.955  | 1.342  | 1.972  | 1.194  | 1.984           | 1.6    | 1.6    |          |
| medroxyprogesterone acetate                  | 1.696  | 1.846  | 0.874  | 1.656  | 1.151  | 1.967           | 1.734  | 1.899  |          |
| PI3K (family)                                | 1.972  | N/A    | 1.513  | 2.196  | 1.009  | 1.513           | 1.972  | 1.795  |          |
| benzoxazin                                   | -1.942 | -1.592 | -1.452 | -2.822 | -1.927 | -1.193          | -1.534 | -1.844 |          |
| CSF2                                         | 0.581  | 1.083  | 1.941  | 0.817  | 1.464  | 2.156           | 1.853  | 1.934  |          |
| PDGF BB                                      | -0.229 | 2.588  | 1.408  | 0.955  | 1.263  | 1.715           | 0.669  | 2.784  |          |
| MUS1                                         | 1.07   | N/A    | 1.983  | 1.983  | 1.846  | 2.414           | 1.336  | 1.336  |          |
| etoposide                                    | 0.818  | 1.79   | 1.412  | 1.812  | 1.516  | 1.154           | 1.224  | 1.788  |          |
| DDX58                                        | N/A    | N/A    | N/A    | 2.383  | 2.397  | 2.372           | 2.178  | 2.178  |          |
| ZALL-CMO                                     | 1.783  | 2.167  | 1.26   | 1.897  | 1.897  | 0.836           | 2.077  | 2.077  |          |
| ATG5                                         | N/A    | N/A    | N/A    | 0.816  | 2.433  | 2.3             | 2      | 2.238  |          |
| deferroxamine                                | 1.026  | 2.769  | 1.026  | 1.026  | 1.294  | 1.709           | 1.539  | 1.091  |          |
| RED1                                         | 1.231  | 0.929  | 1.944  | 2.23   | 1.984  | N/A             | 2.334  | N/A    |          |
| mifepristone                                 | -1.491 | -0.438 | -1.536 | -1.491 | -1.457 | -2.423          | -1.269 | -1.215 |          |
| EGF                                          | 1.023  | 1.167  | 1.23   | 1.562  | 1.019  | 1.193           | 2.227  | 1.702  |          |
| miR-124-3p (and other miRNAs wiseed AAGCAGC) | -1.624 | -2.413 | -1.987 | -1.742 | -1.173 | -1.969          | -1.115 | -0.354 |          |
| CDK12                                        | 1.759  | N/A    | 1.491  | 1.788  | 0.862  | 1.959           | 1.591  | 1.959  |          |
| tasemetostat                                 | -1.248 | N/A    | 1      | -1.227 | -1.729 | -0.938          | -1.119 | -1.566 |          |
| abiraterone                                  | N/A    | N/A    | N/A    | 2.138  | 2.138  | 2.628           | 2.138  | 2.138  |          |

|                                                              |        |        |        |        |        |        |        |        |        |
|--------------------------------------------------------------|--------|--------|--------|--------|--------|--------|--------|--------|--------|
| nicotinotin A                                                |        | -1.375 | 1.375  | -1.213 | -1.292 | -1.814 | -0.326 | -1.879 | -1.853 |
| JAK1                                                         | N/A    | N/A    | N/A    | N/A    | 2.415  | 2.207  | 2.83   | 2.415  | 1.446  |
| Nfya (family)                                                | 1.964  | N/A    | 1.964  | 1.964  | 1.964  | 1.4    | 1.964  | 1.964  |        |
| CSF1                                                         | 1.963  | 1.521  | 1.642  | 1.431  | 1.307  | 1.621  | 1.107  | 1.365  |        |
| TLR3                                                         | N/A    | N/A    | 1.176  | 1.977  | 1.977  | 1.824  | 1.757  | 2.208  |        |
| nicotinic                                                    | 1.633  | 1.152  | N/A    | 1.889  | 2.546  | N/A    | 1.889  | 2.638  |        |
| NONO                                                         | 1.192  | N/A    | N/A    | 1.44   | 1.819  | 3.429  | 0.883  | 2.00   |        |
| EDN1                                                         | 2.216  | 2.39   | N/A    | 1.654  | 0.559  | 1.086  | 1.26   | 1.644  |        |
| nitroson                                                     | 0.947  | 1.246  | 0.78   | 1.186  | 2.594  | 2.594  | 1.213  | 1.313  |        |
| IL2                                                          | 1.832  | N/A    | 0.57   | 2.38   | 1.711  | 0.87   | 1.559  | 1.748  |        |
| TICAM1                                                       | N/A    | N/A    | N/A    | 2.133  | 2.133  | 2.215  | 2.133  | 2.133  |        |
| cigarette smoke                                              | 1.538  | 2.159  | 1.21   | 1.712  | 0.633  | 0.762  | 1.512  | 1.175  |        |
| PRKDC                                                        | 1.492  | 1.941  | 1.423  | 0.35   | 1.452  | 1.423  | 1.119  | 1.445  |        |
| desclabine                                                   | 1.306  | 3.588  | 0.864  | 0.839  | -0.337 | 2.665  | 0.263  | -0.918 |        |
| PF4                                                          | 1.225  | N/A    | 1.225  | 1.543  | 0.816  | 1.543  | 1.543  | 1.73   |        |
| POS                                                          | 1.708  | 1.773  | 0.832  | 0.339  | 0.979  | 1.941  | 0.763  | 1.692  |        |
| Tgf beta                                                     | 1.452  | 1.913  | 2.2    | 1.498  | 0.609  | 2.183  | 0.275  | 1.699  |        |
| inhal                                                        | 1.684  | 2.328  | 1.188  | 0.949  | 0.681  | 1.544  | 1.638  | 1.814  |        |
| IFNA2                                                        | 0.686  | 1.123  | 0.095  | 0.216  | 1.474  | 2.474  | 0.951  | 1.691  |        |
| EBI3L1-Z7B                                                   | N/A    | N/A    | N/A    | 2.219  | 1.982  | 2.186  | 2.219  | 1.62   |        |
| concanavalin a                                               | N/A    | 1.96   | N/A    | 1.974  | 2.2    | N/A    | 2.2    | 2.2    |        |
| NFE2L2                                                       | 1.044  | 1.665  | 1.546  | 0.719  | 0.534  | 2.048  | 2.447  | 0.417  |        |
| JO1                                                          | -1.446 | N/A    | -1.446 | -1.4   | -1.706 | -1.091 | -1.671 | -1.741 |        |
| STAT4                                                        | 1.561  | N/A    | 1.253  | 1.489  | 1.489  | 2.207  | 1.144  | 1.317  |        |
| Igavrin                                                      | N/A    | N/A    | N/A    | 2.138  | 1.912  | 2.813  | 1.664  | 1.912  |        |
| tenofibrate                                                  | 1.698  | N/A    | 1.698  | 1.698  | 1.937  | 0.555  | 1.937  | 0.896  |        |
| IRGM                                                         | -1     | N/A    | N/A    | -1.667 | -1.667 | -3.149 | -0.816 | -1.89  |        |
| 6-bromo-cAMP                                                 | 1.041  | 2.183  | 0.218  | 1.947  | -0.095 | 2.177  | 1.947  | 0.734  |        |
| Cytokine                                                     | 0.536  | N/A    | 1.38   | 1.887  | 1.38   | 1.945  | 1.638  | 1.638  |        |
| AICAR                                                        | 1      | 1.772  | 1      | 1.633  | 1.195  | 1      | 1.633  | 1.095  |        |
| NFATC2                                                       | 3      | N/A    | N/A    | 1.633  | 1.408  | 1.408  | 2.236  | 1.408  |        |
| lamoxifen                                                    | 0.306  | 0.346  | 1.83   | 1.981  | 1.022  | 1.877  | 1.105  | 1.99   |        |
| lecithastin                                                  | 2.031  | 2.062  | 2      | 0.721  | 0.338  | 0.421  | 1.186  | 1.408  |        |
| igm1                                                         | -0.555 | N/A    | N/A    | -1.068 | -1.068 | -2.058 | -1.278 | -2.058 |        |
| Salmonella enterica serotype abortus equi lipopolysaccharide | N/A    | N/A    | N/A    | 1.953  | 1.941  | 1.941  | 2.177  | 2.183  |        |
| SOP2                                                         | N/A    | N/A    | N/A    | -2.218 | -1.762 | -2.592 | -1.553 | -2.028 |        |
| CLDN7                                                        | -1.664 | N/A    | N/A    | -2.2   | -2.294 | -2.236 | -2.2   | -0.92  |        |
| SPZ2                                                         | -1.246 | 1      | -1.227 | -1.229 | -0.836 | N/A    | -1.566 | -2.366 |        |
| TNFSF12                                                      | N/A    | N/A    | 1.98   | N/A    | 1.96   | 1.96   | 2.2    | 1.96   |        |
| ZF-TA-RELA                                                   | N/A    | N/A    | N/A    | 2      | 2      | 2      | 2      | 2      |        |
| IL21                                                         | N/A    | N/A    | N/A    | 2      | 2      | 2      | 2      | 2      |        |
| NOS2                                                         | 1.432  | 1.481  | 0.655  | 1.095  | 1.628  | 1.3    | 0.784  | 1.609  |        |
| flamincinolone acetamide                                     | N/A    | 2      | 1.116  | 1.116  | 1.116  | 2.219  | 0.447  | 1.134  |        |
| NCF                                                          | 1.955  | 1.605  | N/A    | 2      | 1.116  | N/A    | 2.219  | 0.447  |        |
| lofacilimb                                                   | N/A    | N/A    | N/A    | -1.982 | -1.982 | -1.982 | -1.982 | -1.982 |        |
| RNASEH2B                                                     | N/A    | N/A    | N/A    | -1.664 | -1.664 | -2.433 | -1.387 | -2.433 |        |
| RNA11RNA13                                                   | N/A    | N/A    | N/A    | 1.873  | 1.873  | 2.751  | 1.569  | 1.873  |        |
| 1,2-dihydro-3-thione                                         | 1.418  | N/A    | 1.018  | 1.388  | 0.94   | 1.686  | 2.936  | 0.493  |        |
| forskolin                                                    | 0.645  | 1.644  | -0.218 | 1.841  | 0.469  | 2.2    | 0.801  | 2.205  |        |
| NAV1C1                                                       | 1.131  | 0.447  | 1.342  | 1.667  | 1.89   | 0.822  | 1.414  | 1.667  |        |
| 5-fluorouracil                                               | -1.348 | 1.277  | -1.347 | 0.35   | -1.883 | -1.661 | -1.429 | -0.544 |        |
| KLFB                                                         | 1.046  | N/A    | N/A    | 0.961  | 1.199  | 1.97   | 1.474  | 2.16   |        |
| SIPP1                                                        | 1.439  | N/A    | N/A    | 1.458  | 1.458  | 1.087  | 2.213  | 2.173  |        |
| CC                                                           | 0.728  | 0.282  | 1.132  | 1.483  | 1.322  | 1.48   | 2.021  | 1.328  |        |
| CD40                                                         | N/A    | N/A    | N/A    | 2.212  | 1.892  | 1.93   | 1.821  | 1.899  |        |
| ACIN1AC24                                                    | 1      | 2.39   | N/A    | 1.862  | 1.862  | 1.862  | 1.414  | 1.862  |        |
| MTOR                                                         | 1.673  | 1.544  | 1.941  | 0.853  | 0.771  | 1.877  | 0.777  | 0.431  |        |
| ZBTB10                                                       | 0.447  | N/A    | N/A    | 1.195  | 2.219  | 2.379  | 1.195  | 2.219  |        |
| FOXO1                                                        | 0.816  | N/A    | N/A    | 1.941  | 1.265  | 3.051  | 1.265  | 1.265  |        |
| gentofibrate                                                 | 1.213  | 1.213  | 0.655  | 1.913  | 1.529  | 0.833  | 1.213  | 1.213  |        |
| 2-amino-1-methyl-6-phenylimidazo-4,5-b-pyridine              | N/A    | N/A    | N/A    | 2.63   | 1.912  | N/A    | 3.302  | 1.967  |        |
| metylstibestrol                                              | 2.14   | 2.091  | N/A    | 1.987  | 1.987  | N/A    | 1.363  | 1.832  |        |
| CSN1                                                         | 1.965  | N/A    | N/A    | 1.987  | 1.987  | 1.235  | N/A    | 1.965  |        |
| estrogen                                                     | 0.761  | 1.011  | -0.15  | 1.983  | 1.721  | 1.727  | 1.383  | 1.253  |        |
| LDL                                                          | 1.469  | 1.467  | 0.464  | 1.197  | 0.464  | 2.175  | 1.197  | 0.842  |        |
| BF4                                                          | 0.442  | -1     | -1     | -0.971 | -1.706 | -1.452 | -1.383 | -1.383 |        |
| JAK2                                                         | N/A    | N/A    | N/A    | 2.418  | 2.215  | N/A    | 2.418  | 2.215  |        |
| tyrphostin AC490                                             | -0.747 | N/A    | N/A    | -0.786 | -1.839 | -2     | -1.969 | -1.854 |        |
| nitric oxide                                                 | N/A    | 2.382  | 1      | 0.717  | 0.717  | 1      | 0.717  | 1.411  |        |
| REL                                                          | N/A    | N/A    | N/A    | 2.176  | 1.72   | 2.176  | 1.571  | 1.556  |        |
| IKKB                                                         | 0.414  | -0.626 | 1.336  | 1.416  | 0.594  | 1.87   | 1.775  | 0.973  |        |
| IL22                                                         | 1.165  | N/A    | 1.206  | 1.165  | 1.761  | 1.452  | 0.714  | 1.523  |        |
| FSH                                                          | 0.692  | 0.615  | 1.154  | 1.969  | 1.44   | N/A    | 1.351  | 1.705  |        |
| OGA                                                          | 0      | -1.129 | 0.447  | 1.026  | 1.732  | 2.121  | 0.508  | 1.959  |        |
| RPTOR                                                        | 2      | 1.982  | N/A    | 1.342  | N/A    | N/A    | 2.219  | 1.342  |        |
| SENP3                                                        | N/A    | 2      | N/A    | 2.219  | 2      | 2.433  | 2.219  | N/A    |        |
| PD98059                                                      | -1.408 | -0.618 | 0.477  | -0.952 | -0.616 | -1.126 | -1.405 | -2.274 |        |
| CHUK                                                         | 0.767  | 0.302  | 1.199  | 1.288  | 0.895  | 2.144  | 0.874  | 1.467  |        |
| CREB1                                                        | 0.954  | 1.664  | 0.478  | 1.586  | 0.589  | 1.947  | 0.954  | 1.664  |        |
| MYD88                                                        | N/A    | N/A    | 1.099  | 1.722  | 1.722  | 1.722  | 2.207  | 0.685  |        |
| TRAF2                                                        | N/A    | N/A    | N/A    | -1.915 | -1.871 | -2.58  | -1.4   | -1.4   |        |
| AR                                                           | -0.481 | 0.555  | 0.083  | 1.121  | -1.314 | 0.692  | -0.266 | -0.266 |        |
| TRPO                                                         | 1.154  | 1.154  | 1.154  | 1.1    | 1.446  | 1.491  | 1      | 1.446  |        |
| NRG1                                                         | 1.356  | 1.7    | N/A    | 3.363  | 3.327  | N/A    | 1.034  | 1.877  |        |
| JAK1/2                                                       | N/A    | N/A    | N/A    | 2.219  | 2.219  | 2.219  | 2.219  | 1.982  |        |
| tiogilazone                                                  | -0.952 | 1.854  | -0.73  | 0.046  | -1.509 | -1.279 | 0.128  | -1.132 |        |
| PAF1                                                         | N/A    | N/A    | N/A    | 2.342  | 2      | 2.236  | 2      | 2      |        |
| ESR2                                                         | 0.894  | 1.943  | 0.092  | 0.634  | 1.955  | -0.098 | 1.39   | 0.75   |        |
| NFKBIA                                                       | 1.678  | 0.501  | 1.094  | 1.462  | 0.75   | 0.886  | 1.014  | 1.212  |        |
| RICTOR                                                       | -0.798 | N/A    | -1.109 | 0.319  | -2.111 | -1.726 | -1.192 | -1.238 |        |
| chromopyridine                                               | N/A    | N/A    | N/A    | 1.406  | 1.406  | 2.598  | 1.406  | 1.406  |        |
| atalimyrin                                                   | N/A    | N/A    | N/A    | 2.273  | 1.406  | 2.598  | 1.406  | 1.406  |        |
| IFNAR2                                                       | N/A    | N/A    | N/A    | 1.636  | 2.236  | 2      | N/A    | 2      |        |
| estrogen                                                     | N/A    | N/A    | N/A    | 2.219  | 2      | 2.219  | N/A    | 2.238  |        |
| estrogen receptor                                            | -1.36  | -1.342 | -1.408 | -1.539 | -0.563 | -0.64  | -0.956 | -0.647 |        |
| CgG ODN 2006                                                 | N/A    | N/A    | N/A    | 2.132  | 1.886  | 2.549  | N/A    | 1.886  |        |
| nitroimid                                                    | -1.475 | -0.152 | -0.816 | -0.484 | -0.484 | -1.264 | -1.588 | -0.804 |        |
| NLR5                                                         | N/A    | N/A    | N/A    | 2.216  | 1.983  | 1.981  | 2.216  | N/A    |        |
| Tnf (family)                                                 | 1.165  | N/A    | 1.165  | N/A    | 1.452  | 1.709  | 1.452  | 1.452  |        |
| ERBB2                                                        | 1.164  | 1.908  | 0.967  | 0.673  | 0.566  | 0.997  | -0.528 | 1.691  |        |
| IL3                                                          | 1.198  | 2.183  | N/A    | 0.577  | 0.129  | 1.715  | 1.752  | N/A    |        |
| NCQA2                                                        | 1.165  | N/A    | 1.165  | 1.287  | 1.016  | 1.452  | 0.912  | 1.287  |        |
| SP901Z5                                                      | -1.949 | -1.019 | -0.396 | -1.172 | -1.067 | -0.639 | -1.469 | -0.265 |        |
| estamimophen                                                 | 1.705  | N/A    | 1.086  | 1.086  | 1.086  | N/A    | 1.912  | 1.463  |        |
| PAX3-FOXO1                                                   | -0.707 | -1.134 | -0.447 | -2.343 | -1.718 | N/A    | -0.632 | -1.219 |        |
| IL5                                                          | N/A    | N/A    | 2      | 0.896  | 0.647  | 0      | 1.492  | -0.647 |        |
| salmonella minnesota R595 lipopolysaccharides                | N/A    | N/A    | N/A    | 1.965  | 1.965  | N/A    | 2.163  | 1.965  |        |
| DICER1                                                       | -1.718 | -1.604 | N/A    | 0.965  | N/A    | -1.718 | -1.263 | -1.647 |        |
| P38 MAPK                                                     | 0.684  | 2.216  | 0.201  | 1.223  | 0.252  | 1.935  | N/A    | 1.559  |        |
| phosphonate-1-phosphate                                      | -2.183 | N/A    | N/A    | 2.216  | 1.709  | N/A    | 2.219  | N/A    |        |
| NR3C1                                                        | -1.543 | -0.267 | -1.177 | -1.144 | -0.369 | -1.144 | -1.029 | -1.177 |        |
| prostaglandin J2                                             | N/A    | N/A    | N/A    | 1.898  | 1.937  | 1.067  | 2.187  | 1.154  |        |
| IL18                                                         | N/A    | N/A    | N/A    | 1.823  | 1.823  | 2.474  | N/A    | 1.823  |        |
| curcumin                                                     | -0.794 | 0.53   | -0.359 | -1.197 | -1.278 | -1.335 | -1.036 | -1.226 |        |
| peptidoglycan                                                | N/A    | N/A    | N/A    | 1.969  | 1.969  | N/A    | 1.969  | 1.969  |        |
| CoRII analog                                                 | N/A    | N/A    | 0.896  | N/A    | -1.156 | -0.707 | -2.449 | -1.134 |        |

|                                                                |     |        |        |        |        |        |        |        |        |
|----------------------------------------------------------------|-----|--------|--------|--------|--------|--------|--------|--------|--------|
| SNCA                                                           | N/A | N/A    | N/A    | 2.213  | 2.213  | N/A    | 1.982  | 1.982  | 1.432  |
| G protein alpha                                                | N/A | N/A    | N/A    | 1.941  | 1.962  | 1.969  | 1.941  | N/A    | 1.303  |
| mR-5a5p (and other miRNAs wisseed CGCAGUG)                     | N/A | -1.078 | -1.998 | N/A    | -0.544 | -1.108 | -1.408 | -0.277 | -1.303 |
| CNDN1                                                          | N/A | 1.342  | N/A    | N/A    | 0.816  | N/A    | N/A    | -1.134 | 1.673  |
| SVYV1                                                          | N/A | 2.688  | 2.246  | 1.134  | 0.378  | 2.236  | 1.89   | 0.816  | 0.816  |
| betosterone                                                    | N/A | 0.708  | 2.688  | 0.043  | 0.033  | 0.95   | 0.845  | 0.303  | 0.303  |
| ILRN                                                           | N/A | -0.152 | 0      | -1.709 | -2.012 | -1.709 | -1.172 | -1.028 | -1.028 |
| nitroflorant                                                   | N/A | 0.798  | 2      | 1.342  | 0.087  | 1.121  | -0.152 | 1.601  | 0.656  |
| CS15                                                           | N/A | -1.068 | -2.131 | -1     | -0.533 | -0.577 | -1     | -1.298 | -1     |
| metforman                                                      | N/A | 0.816  | 1.457  | 1.242  | 1.134  | 1.364  | 0.378  | 0.707  | 0.573  |
| miR-21                                                         | N/A | -1.068 | -2.132 | 0.283  | -0.485 | -1.533 | -0.558 | -0.584 | -0.724 |
| MYCN                                                           | N/A | -0.8   | -0.465 | -0.585 | -2.131 | -0.163 | 0.621  | -1.584 | 1.061  |
| methsilylene                                                   | N/A | N/A    | N/A    | N/A    | 2      | 1.898  | N/A    | 1.89   | 1.833  |
| coristerone                                                    | N/A | N/A    | N/A    | -1.941 | -2     | -2.368 | N/A    | N/A    | -1.082 |
| Jnk                                                            | N/A | 1.928  | N/A    | 1.229  | 1.483  | 0.62   | N/A    | 1.22   | 0.892  |
| BC12                                                           | N/A | -1.458 | -1.968 | N/A    | -0.663 | -1.018 | N/A    | -0.784 | -1.474 |
| 5-O-methyl-beta-araf-1-(2->5-O-mycloyl-alpha-araf-1-o-1-glyco) | N/A | N/A    | N/A    | 1.342  | 1.411  | 2      | 2      | N/A    | 2      |
| PLX2                                                           | N/A | 1.117  | N/A    | 0.264  | 0.264  | 1.411  | 1.117  | 1.929  | 1.488  |
| beta-estradiol                                                 | N/A | 0.923  | 2.161  | -0.455 | -0.734 | -1.141 | 1.133  | 0.788  | 0.474  |
| prednisolone                                                   | N/A | N/A    | N/A    | -0.816 | N/A    | N/A    | -2.236 | -2.236 | -2.236 |
| molybdenum disulfide                                           | N/A | -0.707 | -1.342 | N/A    | 1.342  | 1.633  | N/A    | N/A    | 2.236  |
| budesonide                                                     | N/A | 0.138  | N/A    | N/A    | 1.981  | 1.352  | N/A    | 1.758  | 1.794  |
| FGF2                                                           | N/A | 0.204  | 0.833  | -0.391 | 1.339  | 1.331  | -0.174 | 1.333  | 1.625  |
| PM1                                                            | N/A | 0.365  | 1.523  | -0.73  | 1.322  | 0.998  | 1.504  | -0.296 | 0.458  |
| STK11                                                          | N/A | 0.229  | -1     | -1.687 | N/A    | N/A    | N/A    | 0.333  | -0.958 |
| PCR                                                            | N/A | 0.928  | 1.711  | 0.928  | 0.404  | 1.004  | 0.718  | 0.388  | 1.063  |
| CEBPB                                                          | N/A | -0.478 | 0.932  | 0.64   | -0.27  | 0.27   | 1.873  | 1.895  | 0.262  |
| ubiquitin                                                      | N/A | 0.713  | 0.985  | 0.713  | 1.282  | 1.316  | 0.713  | 0.387  | 1.033  |
| SP1                                                            | N/A | 0.497  | N/A    | 0.343  | 1.107  | 1.281  | 2.355  | -0.059 | 1.411  |
| PP2A/G1879 tyrosine kinase inhibitor                           | N/A | N/A    | N/A    | N/A    | -2.2   | -1.342 | N/A    | -1.342 | -2.2   |
| cythoxosterone                                                 | N/A | 1.028  | 2.368  | 0.772  | -0.381 | -0.381 | 1.484  | -0.277 | 0.343  |
| cythoxophamide                                                 | N/A | -2.144 | N/A    | N/A    | -0.967 | -0.808 | -1.131 | -0.673 | -1.314 |
| PNP1                                                           | N/A | N/A    | N/A    | N/A    | -1.981 | -2     | -2.795 | N/A    | -2.236 |
| CFH                                                            | N/A | N/A    | N/A    | N/A    | N/A    | N/A    | N/A    | -2.188 | -2.188 |
| cytoposin A                                                    | N/A | -1.608 | 0.221  | -1.54  | 0.093  | -0.951 | -1.072 | -0.427 | -1.05  |
| iron                                                           | N/A | 0.974  | N/A    | 1.989  | 0.974  | -1.072 | 0.974  | 1.061  | 1.061  |
| gadolin                                                        | N/A | N/A    | N/A    | N/A    | -1.864 | -2.218 | -1.387 | -1.864 | N/A    |
| FN alphabeta                                                   | N/A | N/A    | N/A    | N/A    | 2.236  | N/A    | 2.4    | 2.236  | N/A    |
| D-glucose                                                      | N/A | 0.488  | -0.101 | -0.05  | 2.318  | 1.466  | 0.578  | 1.364  | 0.478  |
| rasagilazine                                                   | N/A | -0.438 | N/A    | -0.568 | -1.253 | -0.81  | 0.117  | -1.483 | -2.131 |
| gabapentin                                                     | N/A | 0.438  | N/A    | 0.568  | 1.633  | 0.447  | 2.828  | 0.95   | 0.95   |
| tanespimycin                                                   | N/A | -0.8   | 0.528  | -1.091 | -0.552 | -0.149 | -1.4   | -0.877 | -1.604 |
| mR-182-5p (and other miRNAs wisseed UUGGCA)                    | N/A | N/A    | N/A    | N/A    | -1.833 | -0.816 | -2.236 | -0.447 | -1.833 |
| gpc                                                            | N/A | 0.123  | -2.236 | -1.342 | 0.38   | -0.211 | -2.135 | -0.277 | -1.061 |
| diclofenac                                                     | N/A | 0.555  | 1.154  | 0.391  | 0.447  | 0.896  | 1.4    | 0.896  | 0.97   |
| S-azacytidine                                                  | N/A | 1.984  | 1.941  | N/A    | 1.4    | N/A    | -2.449 | -0.818 | -0.557 |
| LGALS3                                                         | N/A | 1.172  | N/A    | N/A    | 1.27   | 1.953  | N/A    | 0.985  | 1.286  |
| BRCA1                                                          | N/A | -1.387 | 1.749  | N/A    | 0.816  | -0.254 | 2.449  | 0      | 0.393  |
| rasinon                                                        | N/A | -1.387 | N/A    | -1.067 | -0.387 | -0.478 | -1.982 | N/A    | 1.343  |
| Lh                                                             | N/A | N/A    | N/A    | N/A    | -2.308 | 0.625  | N/A    | -0.748 | 1.951  |
| capitain                                                       | N/A | 0.772  | 2.451  | 0.374  | 0.854  | 0.536  | 0.435  | 0.75   | 0.369  |
| fenamic acid                                                   | N/A | 0.657  | N/A    | 1.123  | 1.378  | 1.373  | 1.521  | 1.521  | 1.521  |
| ESR1                                                           | N/A | 0.932  | 0.357  | -1.107 | -1.148 | -0.63  | -1.534 | -0.368 | -1.428 |
| bezafibrate                                                    | N/A | -0.768 | 0.152  | -0.44  | -1.471 | -1.316 | -0.068 | -1.054 | -1.198 |
| NRAS                                                           | N/A | 0.895  | 0.152  | -0.768 | -0.188 | 0.478  | -2     | -0.086 | 0.086  |
| LEP                                                            | N/A | 0.747  | 1.505  | 0.668  | 1.088  | 1.188  | 0.592  | 1.991  | 1.991  |
| ERK                                                            | N/A | 0.328  | 1.671  | 0.768  | 0.803  | 0.301  | 0.865  | 0.328  | 1.428  |
| HMGCoA                                                         | N/A | -1.442 | -2.236 | -0.994 | -0.322 | -1.287 | -0.133 | -0.369 | N/A    |
| metformin                                                      | N/A | -0.951 | -0.463 | -0.85  | -1.388 | -0.621 | -1.075 | -1.075 | -0.235 |
| metformazole                                                   | N/A | -1.342 | N/A    | N/A    | -1     | -1.633 | N/A    | -1.342 | -1     |
| ESRRA                                                          | N/A | 1.982  | 1.912  | N/A    | N/A    | 0.555  | N/A    | 1.71   | 1.015  |
| KDM5B                                                          | N/A | 0.447  | 0      | 0.898  | 0.607  | 1.897  | 1.127  | 0.362  | 0.362  |
| ACT1                                                           | N/A | 1.073  | -1.342 | -0.221 | 1.073  | 0.293  | -0.585 | -0.091 | 1.59   |
| ARNT                                                           | N/A | 0.815  | 2.032  | 0.931  | -0.593 | -0.78  | 0.463  | -0.294 | -0.374 |
| TECFE                                                          | N/A | 1.208  | -1.581 | 0.703  | 0.163  | 0.38   | 1.059  | 0.273  | 0.851  |
| SMARCB1                                                        | N/A | -0.625 | N/A    | N/A    | -1.673 | -1.23  | 0.937  | -1.23  | -0.526 |
| IFNARI                                                         | N/A | N/A    | N/A    | N/A    | 1.994  | N/A    | 2.229  | 1.994  | N/A    |
| E. coli serotype O127B8 lipopolysaccharide                     | N/A | 0.651  | N/A    | 0.651  | 0.39   | 0.57   | 1.432  | 0.91   | 0.97   |
| ethanol                                                        | N/A | 0.508  | 2.189  | 1.131  | 0.456  | -0.267 | 0.087  | 0.811  | 0.721  |
| RASSF1                                                         | N/A | 0.81   | 1.633  | N/A    | 0.64   | 0.508  | -1.067 | -0.478 | 1.238  |
| cythosin AG 1478                                               | N/A | -0.911 | N/A    | N/A    | -1.27  | -0.911 | N/A    | -0.911 | -2.098 |
| ZFP56                                                          | N/A | N/A    | N/A    | N/A    | -1.981 | -1.98  | N/A    | N/A    | -2.213 |
| ETS1                                                           | N/A | N/A    | N/A    | N/A    | 1.987  | 1.969  | N/A    | N/A    | 2.213  |
| LARP1                                                          | N/A | N/A    | N/A    | N/A    | 3.188  | N/A    | N/A    | N/A    | 3      |
| TEAD4                                                          | N/A | 2.213  | N/A    | N/A    | 1.715  | 1.982  | N/A    | N/A    | -0.246 |
| NR4A1                                                          | N/A | N/A    | N/A    | N/A    | 1.751  | 2.418  | N/A    | N/A    | 1.977  |
| MLXPL                                                          | N/A | N/A    | N/A    | N/A    | -3.188 | N/A    | N/A    | N/A    | -2.188 |
| obetimer                                                       | N/A | N/A    | -1.927 | N/A    | -1.988 | N/A    | N/A    | -2.628 | N/A    |
| NCOA3                                                          | N/A | N/A    | N/A    | N/A    | 1.758  | 1.758  | N/A    | 1.944  | 0.596  |
| Pfam3-Cys-Ser-Lys4                                             | N/A | N/A    | N/A    | N/A    | 1.236  | N/A    | 2.407  | 1.236  | 1.176  |
| ribonolone                                                     | N/A | N/A    | N/A    | N/A    | 1.4    | 1.915  | N/A    | 2.2    | 1.522  |
| colistin                                                       | N/A | -1.342 | N/A    | N/A    | -1     | -1.342 | N/A    | -1.342 | -1     |
| kanamycin A                                                    | N/A | -1.342 | N/A    | N/A    | -1     | -1.342 | N/A    | -1.342 | -1     |
| 1-Deoxy-delta-12,14-IP4J2                                      | N/A | -0.168 | 2.384  | 0.15   | -0.707 | -0.96  | -0.904 | -0.214 | -0.917 |
| geldanamycin                                                   | N/A | 1.633  | N/A    | 0.87   | 0.113  | 0.113  | -1     | 0.915  | -0.469 |
| TIF                                                            | N/A | N/A    | N/A    | N/A    | N/A    | N/A    | 2      | N/A    | 2      |
| greasensB                                                      | N/A | N/A    | 2      | N/A    | N/A    | N/A    | 2      | N/A    | 2      |
| ACOX1                                                          | N/A | -0.378 | -1.89  | 0      | -0.447 | -0.378 | -1     | -1.195 | -0.707 |
| APP                                                            | N/A | 1.127  | 1.573  | 0.292  | -0.115 | 0.303  | 1.451  | 0.213  | 0.904  |
| KAT5                                                           | N/A | N/A    | N/A    | N/A    | 1.982  | N/A    | N/A    | 1.982  | 0.262  |
| SMAD4                                                          | N/A | -0.678 | 0.771  | -1.133 | -0.748 | -0.468 | -0.901 | -1.103 | -0.15  |
| PIK3CG                                                         | N/A | N/A    | N/A    | -0.133 | -1.98  | N/A    | -1.98  | -1.98  | N/A    |
| genistein                                                      | N/A | 0      | 1.912  | 0      | -1.13  | -0.418 | 1.38   | 0.816  | -0.303 |
| TO-901317                                                      | N/A | -0.555 | N/A    | -1.067 | -1.067 | -1.067 | N/A    | -1.067 | -1.067 |
| Go 697b                                                        | N/A | -0.388 | N/A    | N/A    | -1.98  | -1.98  | N/A    | N/A    | 1.198  |
| 3'-dinolymethane                                               | N/A | -0.388 | 1.177  | N/A    | -2.463 | 0.327  | 1.432  | 1.243  | 0.933  |
| TAZ                                                            | N/A | N/A    | 1.999  | N/A    | 1.131  | 1.597  | 2.219  | 0.896  | N/A    |
| methylxanthinosoguanidine                                      | N/A | N/A    | 1.999  | N/A    | 1.939  | N/A    | N/A    | N/A    | 1.933  |
| niobolone                                                      | N/A | N/A    | N/A    | N/A    | 1.307  | 2.218  | N/A    | 2.218  | 2.218  |
| SRC                                                            | N/A | N/A    | N/A    | N/A    | 1.539  | 1.103  | N/A    | 1.208  | 1.972  |
| carbon tetrachloride                                           | N/A | 0.179  | 1.981  | 0.849  | 0.762  | -0.414 | N/A    | 0.762  | 0.871  |
| oxalipatin                                                     | N/A | 0.44   | 1.161  | N/A    | 1.4    | 0      | 0.447  | 0.928  | 1.472  |
| IL4                                                            | N/A | 1.053  | 1.982  | 0.718  | -0.351 | 0.327  | 1.087  | -0.984 | -1.917 |
| caloplatin C                                                   | N/A | -0.958 | N/A    | N/A    | -0.554 | -0.958 | N/A    | -0.958 | -1.917 |
| SMAD3                                                          | N/A | 2.222  | 2.12   | 0.264  | 1.12   | -0.744 | -0.514 | 0.962  | -0.767 |
| trametere                                                      | N/A | 0.44   | N/A    | N/A    | 0.407  | 0.409  | 0.389  | 0.449  | 0.449  |
| allopurinol                                                    | N/A | 0.44   | N/A    | N/A    | 1      | 1.265  | 1      | 1.32   | 0.707  |
| gentamicin C                                                   | N/A | 0.44   | N/A    | N/A    | 1      | 1.265  | 1      | 1.265  | 1.707  |
| TNFRSF1A                                                       | N/A | N/A    | N/A    | N/A    | 0.625  | 0.946  | 1.103  | 0.951  | 1.044  |
| BCLE                                                           | N/A | N/A    | N/A    | N/A    | -1.067 | -1.067 | -1.067 | -1.067 | -1.387 |
| FOXO1                                                          | N/A | 0.529  | 0.376  | -0.094 | 0.565  | 0.639  | 1.053  | 1.053  | 1.27   |
| N-Ac-Leu-Neurofascin                                           | N/A | -0.338 | 0.607  | 0.246  | -1.087 | -0.642 | -1.273 | -0.932 | -0.604 |
| genistein                                                      | N/A | 0.431  | 1.923  | 0.047  | -0.075 | 0.51   | 0.758  | 0.535  | 1.226  |
| metnab                                                         | N/A | 0.3172 | N/A    | N/A    | -0.277 | -1.456 | -0.882 | -1.4   | -1.105 |

|                                              |        |        |        |        |        |        |        |        |
|----------------------------------------------|--------|--------|--------|--------|--------|--------|--------|--------|
| STAT5B                                       | 0.046  | 0.128  | -0.659 | -1.847 | -0.267 | 0.906  | -1.412 | 0.215  |
| Vegf                                         | N/A    | N/A    | N/A    | -1.178 | -2.398 | N/A    | N/A    | -1.891 |
| RET                                          | 1.103  | N/A    | 1.406  | 1.406  | 0.218  | 0.254  | 1.534  | 0.943  |
| Dehydroisoandrosterone                       | 1.091  | N/A    | N/A    | 1.091  | N/A    | N/A    | 1.091  | 1.091  |
| borizoximib                                  | 0.055  | 1.688  | -0.437 | 0.913  | 0.39   | 0.146  | -1.132 | 0.688  |
| PLC32                                        | N/A    | N/A    | N/A    | -1.227 | -1.227 | -2.608 | -2.608 | N/A    |
| sulfafas                                     | -0.128 | 2.169  | 0.64   | -0.478 | -1.037 | -0.152 | 0.342  | 0.497  |
| GPER1                                        | -1.439 | N/A    | 2      | 0.832  | 0.41   | 0.518  | N/A    | 1.213  |
| enalapril                                    | 0.471  | N/A    | N/A    | -1.438 | -1.438 | -0.194 | N/A    | -0.397 |
| streptozocin                                 | N/A    | 1.727  | N/A    | N/A    | -0.666 | N/A    | -1.671 | -1.298 |
| PRMT1                                        | 1.154  | N/A    | 1.969  | 1.154  | 0.537  | N/A    | 0.537  | N/A    |
| BRG4                                         | N/A    | N/A    | N/A    | 1.982  | 1.982  | N/A    | N/A    | 1.982  |
| ss7                                          | -1.956 | N/A    | N/A    | -1.486 | -1.486 | 0.437  | N/A    | -1.47  |
| SIM1                                         | N/A    | N/A    | N/A    | 1.342  | N/A    | 2      | 2      | N/A    |
| ARR2                                         | N/A    | N/A    | N/A    | 1.342  | N/A    | 2      | 2      | N/A    |
| HIF1A                                        | 0.107  | 2.329  | -0.365 | 0.095  | -0.827 | 0.659  | 0.518  | -0.439 |
| ceftaxime                                    | 0.085  | 0.614  | 1.378  | 0.987  | 0.162  | 1.233  | 0.704  | -0.161 |
| PPARGC1A                                     | 1.153  | -0.64  | N/A    | 0.610  | 1.059  | -0.17  | N/A    | 1.876  |
| GLP1                                         | 1.191  | N/A    | N/A    | -0.969 | -0.969 | -2.2   | -2.2   | -1.18  |
| KAT2A                                        | 1.114  | N/A    | N/A    | 1.114  | 1.673  | N/A    | 1.41   | -0.195 |
| UGT2                                         | -1.103 | 0      | -1.103 | -1.103 | -0.625 | N/A    | -1.103 | -0.254 |
| UNT3A                                        | 1.191  | N/A    | 0.201  | N/A    | 1.256  | N/A    | 1.91   | N/A    |
| Alpha catenin                                | N/A    | N/A    | N/A    | -1.067 | -1.451 | N/A    | -1.741 | -0.97  |
| Pdgf (complex)                               | 0.714  | 0.499  | N/A    | 1.082  | N/A    | N/A    | 0.796  | 2.173  |
| h98                                          | -0.686 | N/A    | N/A    | -0.686 | -0.686 | N/A    | -1.068 | -1.715 |
| let-7a-5p (and other miRNAs wiseed GAGGUAG)  | -2.419 | -2.231 | N/A    | N/A    | 0.556  | N/A    | N/A    | -1.082 |
| TP63                                         | -1.406 | 1.436  | N/A    | -0.36  | 0.032  | N/A    | 0.248  | 1.7    |
| SCR (complex)                                | 1.981  | N/A    | N/A    | N/A    | 1.461  | N/A    | N/A    | 1.761  |
| ethionine                                    | N/A    | N/A    | N/A    | 1.134  | 1.414  | 1      | 0.816  | 0.816  |
| SIRT1                                        | 0.707  | N/A    | 1.342  | 0.745  | -0.578 | -1.732 | -0.043 | 0      |
| PRKAA1                                       | 1.342  | 0.496  | 0      | 0.816  | 1.381  | N/A    | N/A    | 0      |
| AT1A                                         | 0.294  | N/A    | -0.311 | -0.728 | -0.792 | N/A    | 0.555  | -0.368 |
| nu-96                                        | N/A    | N/A    | N/A    | -1     | 1      | 2      | N/A    | N/A    |
| baclofen                                     | -0.73  | N/A    | N/A    | -0.653 | -1.026 | 0      | -0.649 | -0.553 |
| pyrimidine dithiocarbamate                   | N/A    | N/A    | N/A    | -1.491 | -1.154 | N/A    | -1.154 | -1.154 |
| CDKN1B                                       | -0.618 | N/A    | -0.618 | -0.312 | -0.895 | -0.994 | -0.618 | -0.848 |
| IL13RA                                       | N/A    | N/A    | N/A    | N/A    | -0.896 | N/A    | -1.862 | N/A    |
| vorinostat                                   | -1.501 | N/A    | N/A    | N/A    | -2.4   | N/A    | -1.434 | -1.07  |
| CDPSS5                                       | -0.707 | -1.633 | -0.816 | -1.195 | -1.026 | N/A    | -0.478 | 0      |
| RAF-1                                        | 0.963  | N/A    | N/A    | 0.953  | 0.183  | N/A    | 0.861  | 1.854  |
| mR-20b-3p (and other miRNAs wiseed AGCACCA)  | -1.501 | -2.76  | N/A    | 0      | 0.284  | N/A    | -0.218 | -1.25  |
| thapsigargin                                 | N/A    | 1.567  | N/A    | -0.739 | -1.252 | N/A    | N/A    | -1.252 |
| ERBB3                                        | 0.186  | N/A    | -1     | -1.342 | -0.186 | -1.387 | -0.707 | 0      |
| glucocorticoid                               | 1.118  | N/A    | 0.817  | 1.387  | 0.721  | N/A    | 0.721  | 0      |
| progesterone                                 | 1.098  | N/A    | N/A    | 0.721  | 1.098  | 1.098  | N/A    | 1.468  |
| mR-16-5p (and other miRNAs wiseed AGCGACA)   | N/A    | -0.636 | N/A    | N/A    | N/A    | -0.52  | -2.167 | -1.847 |
| RL4                                          | 0.455  | N/A    | N/A    | -0.32  | -0.52  | 0.717  | 0.717  | -0.823 |
| mR-1-3p (and other miRNAs wiseed GGAUAGU)    | -1.406 | N/A    | N/A    | -0.462 | -0.765 | N/A    | -1.58  | -0.052 |
| IGF1R                                        | 0.257  | 2.183  | N/A    | -0.968 | -0.588 | N/A    | -0.713 | -0.084 |
| EGF7                                         | N/A    | N/A    | N/A    | 1.195  | 0.444  | N/A    | 0.852  | 2.2    |
| methoxsalate                                 | -2.218 | N/A    | N/A    | N/A    | -1.134 | N/A    | -1.342 | N/A    |
| hexachlorobenzene                            | 0.277  | N/A    | N/A    | 0.853  | 1.117  | 0.853  | 0.853  | 0.563  |
| PTEN                                         | 0.021  | 0.171  | -0.918 | -0.869 | -0.869 | -0.918 | -0.781 | -0.48  |
| DUSP1                                        | -0.447 | N/A    | -1     | -0.096 | -0.456 | -1.938 | 0.254  | -0.456 |
| thioacetamide                                | 0.175  | N/A    | N/A    | 1.238  | 0.632  | 1      | 1.294  | 0.269  |
| immunoglobulin                               | -1.571 | -0.98  | -0.156 | -0.044 | -0.19  | 0.619  | -0.369 | -0.497 |
| CD44                                         | -0.651 | 1      | N/A    | -1.311 | -0.039 | N/A    | -0.651 | -1.131 |
| HRAS                                         | 0.669  | 0.525  | 0.071  | 0.501  | 0.492  | -0.093 | -0.303 | 1.877  |
| CEBPA                                        | 0.021  | 1.842  | 0.931  | -0.322 | 0.423  | -0.154 | 0.342  | 0.562  |
| NR1H4                                        | N/A    | N/A    | N/A    | 1.699  | N/A    | 1      | N/A    | 1      |
| IKBK3                                        | N/A    | N/A    | N/A    | -0.551 | 0.589  | 1.804  | 1.16   | 0.588  |
| PI3K (complex)                               | 0.541  | 1.696  | 0.541  | 0.048  | -0.07  | N/A    | -0.392 | 1.195  |
| RAF                                          | -0.765 | 0.625  | -0.836 | -0.11  | -0.486 | -0.186 | -0.457 | -0.457 |
| GAST                                         | N/A    | N/A    | N/A    | 0.566  | N/A    | 1.936  | 1.919  | N/A    |
| SMAD7                                        | -1.958 | -0.99  | N/A    | -0.439 | -0.336 | N/A    | 0.723  | N/A    |
| glycophorinagglutinin                        | N/A    | N/A    | N/A    | 1.071  | 1.412  | 1.412  | 1.568  | N/A    |
| FOXO4                                        | -0.87  | -0.412 | -0.557 | 0.349  | 0.649  | 0      | -0.2   | 1.334  |
| FCGR2A                                       | N/A    | N/A    | N/A    | 1.067  | N/A    | 2.219  | 1.067  | N/A    |
| STAT2                                        | N/A    | N/A    | N/A    | 0.566  | 0.646  | 2.172  | 0.328  | 0.646  |
| YAP1                                         | N/A    | 1.226  | N/A    | 1.009  | 0.296  | N/A    | 1.82   | N/A    |
| TEAD1                                        | 2.2    | N/A    | N/A    | N/A    | 1.964  | N/A    | N/A    | -0.179 |
| ERF type 1                                   | N/A    | N/A    | N/A    | 1.949  | N/A    | 2.391  | N/A    | N/A    |
| diglitzone                                   | -0.581 | 1.958  | -0.289 | -0.533 | -0.263 | 0.034  | -0.263 | -0.411 |
| CALCA                                        | 0      | N/A    | 0.447  | -0.816 | -0.816 | -0.447 | -0.447 | -1.342 |
| methylprednisolone                           | 0.937  | 1.123  | 0.254  | -2.44  | 0.566  | 0.263  | 0.566  | -0.328 |
| ascorbic acid                                | 0.447  | N/A    | 1      | 0.218  | 0.943  | N/A    | N/A    | 1.647  |
| GKI                                          | N/A    | N/A    | N/A    | -0.713 | -1.342 | N/A    | -0.243 | -1.974 |
| growth hormone                               | N/A    | N/A    | N/A    | 1.181  | 1.459  | N/A    | 0.422  | 1.161  |
| peroxymethyl aminonucleoside                 | -0.61  | N/A    | 0.2    | 0.845  | 1.073  | 0.063  | 0.845  | 0.3    |
| UCHL1                                        | N/A    | N/A    | -0.83  | -0.297 | -0.83  | -1.96  | N/A    | -0.321 |
| growth hormone                               | N/A    | N/A    | N/A    | 1.181  | 1.459  | N/A    | 0.422  | 1.161  |
| RN3                                          | N/A    | N/A    | N/A    | 0.64   | 1.109  | 2.236  | N/A    | 0.4    |
| MARK9                                        | N/A    | -0.619 | 0.762  | 0.64   | 1.109  | 2.236  | N/A    | 0.4    |
| epoxomicin                                   | N/A    | N/A    | 0.353  | 1.412  | 0.674  | N/A    | 1.412  | 0.353  |
| TFAP2A                                       | N/A    | N/A    | N/A    | 1.937  | N/A    | 0.014  | 1.067  | 1.192  |
| MAPK14                                       | 0.651  | N/A    | N/A    | 1.194  | 0.014  | 1.222  | 0.666  | 0.443  |
| MAVS                                         | N/A    | N/A    | N/A    | N/A    | 1.98   | 2.2    | N/A    | N/A    |
| mR-338-3p (miRNAs wiseed CCAGCAU)            | -2.364 | 2      | N/A    | N/A    | N/A    | N/A    | N/A    | N/A    |
| h11                                          | -1.964 | 2.183  | N/A    | N/A    | N/A    | N/A    | N/A    | N/A    |
| COL18A1                                      | -0.762 | N/A    | N/A    | -0.762 | 0.057  | -1.461 | -0.334 | -0.762 |
| EGR1                                         | -0.447 | 1.961  | 1      | -0.083 | 0.128  | 0.264  | 0.264  | 0.254  |
| patatinin C                                  | N/A    | 2.172  | N/A    | N/A    | -0.968 | N/A    | N/A    | N/A    |
| LUSP18                                       | N/A    | N/A    | N/A    | -1.067 | N/A    | -1.982 | -1.067 | N/A    |
| mir-29                                       | -1.96  | -1.192 | N/A    | 2.168  | 0.88   | N/A    | 1.934  | 0.08   |
| PLG                                          | N/A    | N/A    | N/A    | 2.168  | 0.88   | N/A    | 1.934  | 0.08   |
| DGT                                          | -0.577 | 1.214  | N/A    | 0.447  | -0.447 | N/A    | 0.816  | 0.6    |
| mR-199a-5p (and other miRNAs wiseed CCAGUGU) | -1.387 | N/A    | N/A    | -1.172 | -1.387 | N/A    | 0.152  | N/A    |
| SOX11                                        | N/A    | N/A    | N/A    | -1.694 | -1.067 | -1.342 | N/A    | N/A    |
| CYP19A1                                      | N/A    | N/A    | N/A    | N/A    | 1.029  | N/A    | 1.981  | 1.029  |
| mR-21-5p (and other miRNAs wiseed AGCUUUA)   | -1.967 | -1.095 | N/A    | N/A    | N/A    | N/A    | -0.964 | N/A    |
| BDNF                                         | 0.351  | N/A    | N/A    | -0.158 | 0.158  | 0.053  | 1.318  | 0.522  |
| TSC2                                         | 0.216  | -1.091 | N/A    | 0.426  | 0.384  | 0      | -0.713 | 1.195  |
| CRP                                          | N/A    | N/A    | N/A    | N/A    | 2      | N/A    | 2      | N/A    |
| PS-1145                                      | N/A    | N/A    | N/A    | N/A    | 2      | N/A    | 2      | N/A    |
| S100A9                                       | N/A    | N/A    | N/A    | N/A    | 2      | N/A    | 2      | N/A    |
| NOTCH1                                       | 0.862  | N/A    | N/A    | 0.681  | 0.358  | N/A    | 1      | 0.959  |
| pentoxifylline                               | N/A    | N/A    | N/A    | 0.545  | -0.096 | -0.329 | 1.04   | N/A    |
| dimethyl itaconate                           | 0.416  | -0.487 | -0.368 | -0.54  | -1.982 | N/A    | -1.982 | 0.702  |
| PDLIM2                                       | N/A    | N/A    | N/A    | -1.387 | -1.387 | -0.128 | -1.067 | N/A    |
| PCZF3                                        | N/A    | N/A    | N/A    | -1.982 | N/A    | -1.982 | N/A    | N/A    |
| PTGS2                                        | 1.131  | N/A    | N/A    | 0.492  | N/A    | 1.131  | 0.808  | 0.6    |
| RARA                                         | 0.447  | -1     | N/A    | -0.632 | -0.302 | -1.269 | 0      | -0.302 |
| SHC1                                         | 0.271  | N/A    | 1.009  | -0.821 | -0.961 | -0.106 | 0.465  | 0.811  |
| TP73                                         | N/A    | 1.227  | N/A    | 0.566  | -0.978 | -0.808 | -0.228 | -0.105 |
| NS-398                                       | N/A    | N/A    | N/A    | -1.968 | N/A    | N/A    | -1.968 | N/A    |
| RF2                                          | 0.728  | N/A    | N/A    | 0.728  | 1.41   | 0.277  | 0.277  | 0.522  |



|                                           |     |        |        |        |        |        |        |        |        |        |       |
|-------------------------------------------|-----|--------|--------|--------|--------|--------|--------|--------|--------|--------|-------|
| GW3965                                    | N/A | N/A    | N/A    | N/A    | -1.964 | N/A    | -1.964 | N/A    | N/A    | N/A    | 0.281 |
| ADIPOQ                                    |     | -0.82  | N/A    | -0.82  | -1.184 | N/A    | 0.447  | -0.82  | 1      |        |       |
| PLT1                                      |     | 1      | -0.447 | N/A    | N/A    | 0.447  | 0      |        | 1      |        |       |
| PTPN6                                     | N/A | N/A    | N/A    | N/A    | -1.091 | -1.091 | N/A    |        | -0.6   | -1.091 |       |
| GHI                                       |     | -0.447 | N/A    | N/A    | -0.447 | -1.633 | N/A    | -1.342 | N/A    |        |       |
| PTPAA1                                    |     | 0      | 0.915  | N/A    | 1.253  | -0.808 | N/A    | -0.492 | -0.391 |        |       |
| CDKMTA                                    |     | 0.138  | 0.13   | 0.085  | 1.197  | -0.488 | 0.543  | 0.648  | 0.632  |        |       |
| arsenite                                  | N/A | N/A    | 2.141  | N/A    | N/A    | 0.6    | N/A    | 1.051  | N/A    |        |       |
| nr-8                                      |     | -0.975 | -0.273 | -0.598 | -0.241 | 0.215  | -0.598 | -0.681 | 0.222  |        |       |
| tosimane                                  |     | 0.447  | N/A    | N/A    | 0.707  | N/A    | 1.294  | 1.285  | 0.378  |        |       |
| CIITA                                     | N/A | N/A    | N/A    | N/A    | 1.241  | N/A    |        | 1.264  | N/A    |        |       |
| FGFR1                                     |     | 0.447  | N/A    | N/A    | 1.348  | N/A    | N/A    | N/A    | 2.421  |        |       |
| nosine                                    | N/A | 0.447  | N/A    | N/A    | 0      | 1.216  | N/A    | 1.093  | N/A    |        |       |
| ILR2                                      | N/A | N/A    | -0.762 | N/A    | N/A    | 0      | 1.688  | N/A    | 0.548  | 0.749  |       |
| MKNK1                                     |     | 1.134  | N/A    | N/A    | -0.447 | 0.707  | N/A    | 0.447  | -0.7   |        |       |
| IFAK                                      | N/A | N/A    | N/A    | N/A    | N/A    | 0.625  | N/A    | 0.243  | 1.103  |        |       |
| ADRB                                      |     | 0.781  | -1.172 | N/A    | -0.13  | 0.87   | 0.283  | 0.2    | 0.115  |        |       |
| SMARCA5                                   | N/A | N/A    | -2     | N/A    | -0.6   | N/A    | N/A    | -1.091 | N/A    |        |       |
| JAG1                                      | N/A | N/A    | 1.446  | N/A    | 0.686  | N/A    | 2.206  | N/A    | N/A    |        |       |
| C22c2                                     |     | 0.555  | N/A    | 0.686  | -0.391 | 1.339  | N/A    | N/A    | 0.714  |        |       |
| KLF11                                     |     | -0.686 | N/A    | N/A    | -1.719 | -0.152 | N/A    | N/A    | -1.067 |        |       |
| IL33                                      |     | 0.585  | N/A    | 0.585  | 0.585  | 0.106  | 0.585  | 0.585  | 0.585  |        |       |
| RAS                                       | N/A | N/A    | N/A    | 1.202  | 1.117  | N/A    | 0.305  | N/A    | 0.978  |        |       |
| IRF5                                      | N/A | N/A    | N/A    | N/A    | 0.692  | N/A    | 2.213  | 0.692  | N/A    |        |       |
| EGFR                                      |     | -0.459 | 0.028  | -1.226 | 0.178  | -0.036 | 0.217  | 1.051  | 0.401  |        |       |
| IFIT1                                     |     | 0.277  | 0.661  | N/A    | 0.44   | N/A    | 0.882  | 0.882  | 0.444  |        |       |
| FAS                                       |     | -0.459 | 0.200  | -0.389 | -0.093 | -0.959 | 0.134  | 0.275  | -0.272 |        |       |
| Collagen type 1 (complex)                 | N/A | N/A    | N/A    | N/A    | 1.982  | -0.147 | N/A    | N/A    | 1.432  |        |       |
| IGFBP2                                    |     | N/A    | N/A    | N/A    | N/A    | 0.317  | N/A    | 0.277  | N/A    |        |       |
| pyrocholic acid                           |     | -0.478 | N/A    | 1      | -0.152 | -0.152 | -0.896 | -0.152 | 0.238  | -0.478 |       |
| PRDM1                                     |     | 0.781  | N/A    | 1      | 0.152  | -0.373 | N/A    | -0.719 | 0.345  | -0.835 |       |
| COL5A1                                    |     | -1.067 | N/A    | N/A    | -0.896 | -0.088 | -1.447 | N/A    | -1     |        |       |
| lansomycin                                |     | -1.068 | N/A    | N/A    | -0.896 | -0.088 | 0.113  | -0.788 | 0.075  | 0.47   |       |
| NORAD                                     |     | 1.342  | N/A    | 2      | N/A    | -0.152 | N/A    | N/A    | N/A    |        |       |
| STAT3                                     |     | -0.468 | -0.418 | 0.563  | -0.171 | -0.416 | 0.679  | -0.539 | -0.398 | -0.103 |       |
| ERK1/2                                    |     | 0.114  | 0.114  | 0.114  | 0.114  | -0.736 | -0.82  | -0.366 | -0.611 |        |       |
| salolol                                   |     | 0.057  | 1.408  | 0.44   | 0.458  | -0.247 | 0.479  | -0.307 | -0.307 | -0.038 |       |
| 2-bromoethylamine                         |     | 0.447  | N/A    | N/A    | 0.378  | 1      | N/A    | 1.265  | 0.378  |        |       |
| Collagen type IV                          |     | 0      | N/A    | N/A    | 1.982  | N/A    | 0.447  | N/A    | N/A    | 1.458  |       |
| casomium                                  | N/A | N/A    | N/A    | N/A    | N/A    | N/A    | N/A    | N/A    | N/A    | 1.458  |       |
| FOXO3                                     |     | -0.033 | -0.528 | N/A    | -0.38  | 0.015  | 1.226  | 0.443  | -0.138 | 0.677  |       |
| KLF2                                      |     | 0.075  | -0.596 | N/A    | 0.687  | 0.482  | 1.118  | 0.088  | 0.82   | 0.258  |       |
| neostigmine                               |     | -0.033 | 1.82   | 0.687  | 0.011  | 0.163  | 0.33   | 0.53   | -0.091 | -0.251 |       |
| PPARA                                     |     | -1.079 | N/A    | N/A    | 0.25   | -0.976 | -0.379 | N/A    | -0.606 | -0.128 |       |
| bunamycin                                 | N/A | N/A    | 1.281  | N/A    | N/A    | N/A    | -1.944 | -0.192 | N/A    | N/A    |       |
| CAT45                                     | N/A | 1.446  | 1.989  | N/A    | N/A    | N/A    | N/A    | N/A    | N/A    | N/A    |       |
| vitamin E                                 | N/A | N/A    | N/A    | N/A    | N/A    | N/A    | -1.408 | N/A    | N/A    | N/A    |       |
| E2F3                                      |     | 0.447  | N/A    | N/A    | N/A    | 0.816  | N/A    | N/A    | 1.134  | 1      |       |
| VIP                                       |     | 0.849  | N/A    | 0.849  | -0.357 | 1.508  | 0.849  | -0.357 | 0.964  | 0.056  |       |
| ATG7                                      |     | N/A    | -0.728 | N/A    | 0.849  | -0.728 | -1.406 | N/A    | -1.948 | N/A    |       |
| SOX4                                      |     | N/A    | N/A    | N/A    | N/A    | -1.406 | N/A    | -1.948 | N/A    | N/A    |       |
| CDKN2A                                    |     | -0.228 | 1.064  | N/A    | 0.108  | -0.882 | N/A    | -0.25  | 0.877  | 0.313  |       |
| 4-hydroxylamoxifen                        |     | 0.027  | 2.185  | N/A    | 0.332  | 0.027  | -0.081 | 0.332  | -0.081 | 0.863  |       |
| BMP10                                     | N/A | N/A    | N/A    | N/A    | N/A    | -1     | 0.2    | 0      | -1.342 | N/A    |       |
| KLF5                                      |     | 1.922  | N/A    | N/A    | N/A    | 1.412  | N/A    | N/A    | N/A    | N/A    |       |
| ELK2                                      |     | 1.941  | -0.842 | N/A    | N/A    | N/A    | 1.508  | 0.52   | N/A    | N/A    |       |
| enaldomide                                | N/A | N/A    | N/A    | -0.651 | 1.408  | N/A    | N/A    | 1.109  | N/A    | 0.13   |       |
| 6-hydroxydopamine                         | N/A | N/A    | N/A    | N/A    | N/A    | 1.109  | N/A    | 2.164  | N/A    | N/A    |       |
| HDXA10                                    |     | 0      | N/A    | N/A    | 0.447  | N/A    | 0.15   | N/A    | 0.816  | 0.42   |       |
| MADK1                                     | N/A | N/A    | N/A    | N/A    | 1.601  | N/A    | -0.662 | N/A    | 2.238  | 1.172  |       |
| APC                                       |     | -0.339 | N/A    | N/A    | N/A    | -0.662 | N/A    | -1     | -1     | -1.214 |       |
| nr-1                                      | N/A | N/A    | N/A    | N/A    | N/A    | -1.067 | N/A    | -2.178 | N/A    | N/A    |       |
| IFIT1                                     | N/A | N/A    | N/A    | N/A    | N/A    | N/A    | N/A    | N/A    | N/A    | N/A    |       |
| FGF8                                      |     | 1.941  | N/A    | N/A    | N/A    | 1.292  | N/A    | N/A    | N/A    | N/A    |       |
| HSF1                                      | N/A | N/A    | 0.415  | N/A    | 1.192  | -0.074 | 0.585  | N/A    | N/A    | N/A    |       |
| L-glutamic acid                           | N/A | N/A    | N/A    | N/A    | 1.164  | -0.239 | N/A    | 0.708  | N/A    | 1.154  |       |
| BMP4                                      |     | 0.895  | 1.985  | N/A    | N/A    | 0.34   | N/A    | N/A    | N/A    | N/A    |       |
| ZBTB16                                    |     | 0      | -1.981 | 0.152  | N/A    | 0.152  | -0.927 | N/A    | N/A    | N/A    |       |
| Bay 11-7082                               | N/A | N/A    | N/A    | -1.067 | N/A    | -1.067 | N/A    | N/A    | N/A    | -1.067 |       |
| nr-158                                    | N/A | -0.13  | N/A    | N/A    | -0.13  | -0.798 | -0.933 | -0.485 | -0.577 |        |       |
| GAPDH                                     | N/A | N/A    | N/A    | N/A    | 0      | -0.816 | -1.915 | 0      | -0.447 |        |       |
| RAC1                                      | N/A | N/A    | N/A    | N/A    | 1.939  | 0.344  | N/A    | 0.894  | N/A    | N/A    |       |
| nitrochloridbenzodiox                     |     | 0.484  | -0.512 | N/A    | N/A    | 1.317  | -0.048 | N/A    | 0.964  | 0.718  |       |
| nr-17-sp (and other mRNAs wiseed AAAGUGC) |     | -1.928 | N/A    | N/A    | N/A    | -1.231 | N/A    | N/A    | N/A    | N/A    |       |
| levodopa                                  |     | -0.426 | 0.378  | N/A    | 0.777  | 0.612  | N/A    | -0.169 | 0.777  | -0.426 |       |
| herbimycin                                |     | -1     | N/A    | N/A    | -0.686 | N/A    | N/A    | N/A    | N/A    | -1.067 |       |
| GSTO1                                     | N/A | N/A    | 1.131  | N/A    | N/A    | N/A    | N/A    | -2     | N/A    | N/A    |       |
| STING1                                    | N/A | N/A    | N/A    | N/A    | 1.179  | N/A    | 1.944  | N/A    | N/A    | N/A    |       |
| SF3                                       |     | 1.091  | N/A    | N/A    | N/A    | 0.865  | N/A    | N/A    | 1.159  | 1.550  |       |
| INF4A                                     |     | -0.102 | N/A    | 0.508  | -1.127 | -0.708 | 0      | -0.338 | 0.333  | 0.333  |       |
| APOE                                      |     | 0      | N/A    | -1     | -0.128 | -0.239 | -1.387 | -0.342 | N/A    | N/A    |       |
| IL10                                      | N/A | N/A    | 1.997  | N/A    | N/A    | 0.072  | N/A    | N/A    | N/A    | 0.802  |       |
| ilfataxin B1                              | N/A | N/A    | 2.236  | N/A    | N/A    | N/A    | N/A    | N/A    | N/A    | 1.166  |       |
| teneldine                                 | N/A | N/A    | N/A    | N/A    | N/A    | -1.109 | -1.941 | N/A    | N/A    | N/A    |       |
| ANGP12                                    |     | N/A    | N/A    | N/A    | -0.223 | -0.156 | N/A    | 1.951  | 0.714  | 0.714  |       |
| ETV5                                      |     | -1     | N/A    | N/A    | 0.272  | -0.426 | N/A    | -0.62  | 0.816  | 0.816  |       |
| PAX6                                      | N/A | N/A    | N/A    | N/A    | N/A    | -1.206 | N/A    | -0.9   | -0.911 | 1.067  |       |
| KDMA5                                     | N/A | N/A    | N/A    | N/A    | 1.387  | 0.555  | N/A    | N/A    | N/A    | N/A    |       |
| SABF2                                     | N/A | N/A    | N/A    | N/A    | -1     | -1     | N/A    | N/A    | N/A    | N/A    |       |
| SABF                                      | N/A | N/A    | N/A    | N/A    | -1     | -1     | N/A    | N/A    | N/A    | N/A    |       |
| IFNGR1                                    | N/A | N/A    | N/A    | N/A    | 1      | N/A    | N/A    | 1      | 1      | 1      |       |
| disody/maleimide 1                        |     | -0.692 | N/A    | N/A    | -0.218 | -0.294 | N/A    | -1.067 | -0.692 | -0.692 |       |
| IL17A                                     |     | 0.768  | 0      | 0.768  | -0.035 | -0.174 | 0.398  | -0.378 | 0.372  | 0.372  |       |
| Carbon monoxide                           | N/A | N/A    | N/A    | N/A    | -0.9   | -1.109 | N/A    | -0.9   | N/A    | N/A    |       |
| SRP                                       |     | N/A    | 0.81   | N/A    | 1.122  | -0.094 | N/A    | -1.067 | N/A    | N/A    |       |
| uranyl nitrate                            |     | -0.97  | N/A    | N/A    | 0.784  | 0.218  | N/A    | 0.114  | 0.114  | 0.762  |       |
| butyric acid                              |     | -0.621 | -0.561 | -0.105 | -0.255 | -0.375 | 0      | -0.819 | -0.108 | -0.108 |       |
| TWIST1                                    |     | 0.218  | -0.277 | N/A    | 0.218  | -0.678 | N/A    | -0.446 | -0.446 | -0.446 |       |
| CDX1                                      | N/A | N/A    | N/A    | N/A    | N/A    | N/A    | N/A    | N/A    | N/A    | 0.832  |       |
| cleoteycin                                |     | 0.246  | N/A    | N/A    | 1.308  | 0.507  | N/A    | N/A    | 1      | 0.742  |       |
| HDAC2                                     |     | 1      | -0.975 | N/A    | 0.447  | N/A    | N/A    | N/A    | -0.377 | -0.377 |       |
| HAC                                       |     | -0.083 | 0.573  | 0.657  | -0.363 | -0.282 | 0.293  | 0.315  | 0.243  | 0.243  |       |
| RCS2                                      |     | 0      | N/A    | N/A    | -0.447 | -0.447 | N/A    | -1     | -1     | -1.342 |       |
| VHL                                       |     | 0.359  | -0.604 | 0.577  | 0.45   | 0.514  | N/A    | 0.203  | -0.955 | -0.955 |       |
| PTH                                       |     | N/A    | N/A    | N/A    | N/A    | -0.786 | -1.206 | N/A    | -1.154 | -0.798 |       |
| SMAD2                                     | N/A | N/A    | N/A    | N/A    | N/A    | -1.109 | N/A    | N/A    | -1.154 | -0.452 |       |
| TGFBR2                                    | N/A | N/A    | 0.186  | -0.594 | N/A    | 0.543  | N/A    | 0.371  | 1.044  | 1.044  |       |
| MKR                                       |     | 1      | N/A    | N/A    | 1      | 0.728  | N/A    | N/A    | N/A    | N/A    |       |
| nosine                                    |     | 1.239  | N/A    | N/A    | N/A    | 1.458  | N/A    | N/A    | N/A    | N/A    |       |
| CDK19                                     |     | N/A    | -2.646 | N/A    | N/A    | N/A    | N/A    | N/A    | N/A    | N/A    |       |
| isopropylphosphoric acid                  |     | N/A    | N/A    | N/A    | 1.898  | 0.748  | N/A    | N/A    | N/A    | N/A    |       |
| IRF8                                      |     | N/A    | 0.254  | N/A    | -0.18  | -0.579 | N/A    | -0.898 | -0.73  | -0.73  |       |
| caffeic acid phenethyl ester              |     | -0.927 | N/A    | 0.132  | -0.351 | -0.715 | N/A    | -0.351 | 0.132  | 0.132  |       |
| cobalt chloride                           |     | N/A    | 2.2    | N/A    | N/A    | -0.132 | N/A    | -0.132 | -0.132 | -0.132 |       |
| RBI                                       |     | N/A    | -1     | N/A    | N/A    | -0.243 | N/A    | 0.277  | -0.069 | -0.069 |       |
| N-methyl-L-arginine methyl ester          |     | N/A    | -1.067 | N/A    | 1.521  | N/A    | N/A    | N/A    | N/A    | N/A    |       |







**Table S4 Antibody information**

| <b>Antibody</b>                  | <b>Dilution</b> | <b>Company</b>                                                      | <b>Clone</b> |
|----------------------------------|-----------------|---------------------------------------------------------------------|--------------|
| anti-Nestin                      | 1:100           | Invitrogen (Human Neural Stem Cell Immunocytochemistry Kit, A24354) | N/A          |
| anti-PAX6                        | 1:100           | Invitrogen (Human Neural Stem Cell Immunocytochemistry Kit, A24354) | N/A          |
| anti-SOX1                        | 1:100           | Invitrogen (Human Neural Stem Cell Immunocytochemistry Kit, A24354) | N/A          |
| anti-SOX2                        | 1:100           | Invitrogen (Human Neural Stem Cell Immunocytochemistry Kit, A24354) | N/A          |
| anti- $\beta$ -tubulin III       | 1:250           | Biolegend (801201)                                                  | TUJ1         |
| anti-MAP2                        | 1:100           | Santa Cruz (sc-74421)                                               | A-4          |
| anti-IL17R                       | 1:50            | Santa Cruz (sc-376374)                                              | G-9          |
| anti-TNF-R1                      | 1:100           | Santa Cruz (sc-8436)                                                | H-5          |
| AF 488 anti NF-H (SMI32)         | 1:250           | Biolegend (801706)                                                  | SMI 32       |
| AF 594 anti NF-H (SMI31)         | 1:200           | Biolegend (801610)                                                  | SMI 31       |
| AF 647 anti NF-L                 | 1:200           | Biolegend (845908)                                                  | NFL3         |
| anti-AQP4                        | 1:100           | Elabscience (E-AB-64864)                                            | Polyclonal   |
| anti-GFAP                        | 1:250           | Agilent (GA52461-2)                                                 | Polyclonal   |
| Goat anti-Rabbit Alexa fluor 488 | 1:1000          | Invitrogen (A-11008)                                                | Polyclonal   |
| Goat anti-Mouse Alexa fluor 488  | 1:1000          | Invitrogen (A-11001)                                                | Polyclonal   |
| Goat anti-Rabbit Alexa fluor 594 | 1:1000          | Invitrogen (A-11012)                                                | Polyclonal   |
| Goat anti-Mouse Alexa fluor 594  | 1:1000          | Invitrogen (A-11005)                                                | Polyclonal   |
